# Supplementary material for: Synthesis of polycyclic spiroindolines by highly diastereoselective interrupted Ugi cascade reactions of 3-(2-isocyanoethyl)indoles
Source: Royal Society of Chemistry journal article supplement (doi:10.1039/c6cc07459f), 2016-01-01
Supplement: c6cc07459f1.pdf [file c6cc07459f1.pdf]

## Electronic Supplementary Information for

### Synthesis of polycyclic spiroindolines by highly diastereo-selective interrupted Ugi cascade reactions of 3-(2-isocyano-ethyl)indoles

**Jordy M. Saya,<sup>†</sup> Barry Oppelaar,<sup>†</sup> Răzvan C. Cioc,<sup>†</sup> Gydo van der Heijden,<sup>†</sup> Christophe M. L. Vande Velde,<sup>‡</sup> Romano V. A. Orru,<sup>†</sup> Eelco Ruijter<sup>\*,†</sup>**

<sup>†</sup> Department of Chemistry & Pharmaceutical Sciences and Amsterdam Institute for Molecules, Medicines & Systems (AIMMS), Vrije Universiteit Amsterdam, De Boelelaan 1108, 1081 HZ Amsterdam, The Netherlands

<sup>‡</sup> Faculty of Applied Engineering, Advanced Reactor Technology, University of Antwerp, Groenenborgerlaan 171, 2020 Antwerpen, Belgium

E-mail: [e.ruijter@vu.nl](mailto:e.ruijter@vu.nl)

## Content

|                                                                               |    |
|-------------------------------------------------------------------------------|----|
| General information .....                                                     | 3  |
| Synthetic procedures .....                                                    | 4  |
| General procedure A: Synthesis of the tryptamine derived isocyanides. ....    | 4  |
| General procedure B: interrupted Ugi reaction to form spiroindolines.....     | 5  |
| General procedure C: Subsequent Ugi reaction to form compounds of type 8..... | 14 |
| One pot interrupted Ugi / Joullié-Ugi towards 8a. ....                        | 16 |
| X-ray analysis .....                                                          | 17 |
| Copies of Spectra .....                                                       | 18 |
| References .....                                                              | 44 |

## General information

Unless stated otherwise, all solvents and commercially available reagents were used as purchased. Dry dichloromethane was obtained by an Inert Solvent Purification System. All other solvents were used as purchased. 1-methyltryptamine<sup>1</sup>, 2-methyltryptamine<sup>2</sup> and 1-methylcyclohexane-1-carboxaldehyde<sup>3</sup> were synthesized according to literature procedures.

Nuclear magnetic resonance (NMR) spectra were recorded on a Bruker Avance 500 (125.78 MHz for <sup>13</sup>C) or Bruker Avance 300 (83.85 MHz for <sup>13</sup>C) using the residual solvent as internal standard (<sup>1</sup>H: δ 7.26 ppm, <sup>13</sup>C{<sup>1</sup>H}: δ 77.16 ppm for CDCl<sub>3</sub>, <sup>1</sup>H: δ 2.50 ppm, <sup>13</sup>C{<sup>1</sup>H}: δ 39.52 ppm for DMSO-*d*<sub>6</sub>). Chemical shifts (δ) are given in ppm and coupling constants (J) are quoted in hertz (Hz). Resonances are described as s (singlet), d (doublet), t (triplet), q (quartet), quint (quintet), sex (sextet), sep (septet), br (broad singlet) and m (multiplet) or combinations thereof. Infrared (IR) spectra were recorded neat using a Shimadzu FTIR-8400s spectrophotometer and wavenumbers are reported in cm<sup>-1</sup>. Electrospray Ionization (ESI) high-resolution mass spectrometry (HRMS) was carried out using a Bruker microTOF-Q instrument in positive ion mode (capillary potential of 4500 V). Flash chromatography was performed on Silicycle Silia-P Flash Silica Gel (particle size 40-63 μm, pore diameter 60Å) using the indicated eluent. Thin Layer Chromatography (TLC) was performed using TLC plates from Merck (SiO<sub>2</sub>, Kieselgel 60 F254 neutral, on aluminium with fluorescence indicator) and compounds were visualized by UV detection (254 nm) and KMnO<sub>4</sub> stain. X-ray analysis was performed on an Agilent SuperNova diffractometer with Cu K(α) microsource, mirror monochromator and Atlas CCD detector. The data were reduced and corrected for absorption with CrysAlisPro, Agilent Technologies, Version 1.171.38.41r (Rigaku OD, 2015). The structure was solved with SHELXS-2014/7<sup>3</sup> and refined with SHELXL-2014/7<sup>4</sup> and the ShelxLE graphical interface<sup>5</sup>.

## Synthetic procedures

### General procedure A: Synthesis of the tryptamine derived isocyanides.

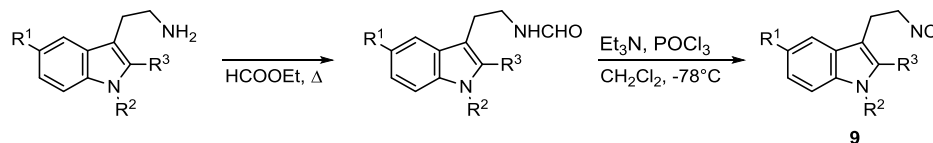

Prepared according to a modified procedure by Zhao and coworkers. Tryptamine was mixed with ethyl formate (1.25 M) and heated to reflux for 16 h. The excess ethyl formate was concentrated *in vacuo*. Without further purification, the crude formamide was dissolved in anhydrous dichloromethane (0.5 M). Subsequently triethylamine (5 equiv) and phosphoryl chloride (1.5 equiv) were respectively dropwise added at  $-78^{\circ}\text{C}$ . After mixing for 3 h at this temperature, the reaction was quenched by addition of the crude mixture in ice-cold water. The product was extracted three times with dichloromethane, washed with water and brine, dried over sodium sulfate and concentrated *in vacuo*. Pure isocyanide could be obtained by flash column chromatography using dichloromethane as eluent.

#### 3-(2-isocyanoethyl)-1H-indole (9a)

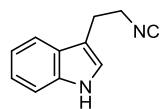

According to procedure A the formamide was prepared using tryptamine (10 g, 62.4 mmol) and ethyl formate (50 ml). Subsequently, the isocyanide could be obtained using crude formamide, triethylamine (43.5 ml, 312 mmol) and phosphoryl chloride (8.7 mL, 96.6 mmol) in dichloromethane (120 ml). The title compound was isolated as a brownish solid (6.1 g, 36 mmol, 57%).

$^1\text{H}$  NMR (500 MHz,  $\text{CDCl}_3$ )  $\delta$  8.19 (s, 1H), 7.60 (d,  $J = 7.7$  Hz, 1H), 7.40 (d,  $J = 8.1$  Hz, 1H), 7.28 (td,  $J = 9.0, 8.1, 2.8$  Hz, 1H), 7.21 (td,  $J = 7.5, 2.8$  Hz, 1H), 7.10 (t,  $J = 2.1$  Hz, 1H), 3.67 (tt,  $J = 7.0, 1.9$  Hz, 2H), 3.18 (tt,  $J = 7.0, 2.0$  Hz, 2H).

#### 3-(2-isocyanoethyl)-5-methoxy-1H-indole (9b)

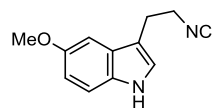

5-methoxytryptamine hydrochloric acid (4.5 g, 20 mmol) was mixed with ethyl formate (20 ml) and potassium carbonate (2.76 g, 20 mmol) and heated to reflux for 16 h. Water was added to the mixture and the product was extracted with ethyl acetate. After washing with brine, drying over sodium sulfate and concentrating *in vacuo*, the crude formamide was directly used without additional purification in the isocyanide synthesis. Following procedure A the isocyanide could be obtained using crude formamide, triethylamine (13.9 mL, 100 mmol) and phosphoryl chloride (2.79 mL, 30 mmol) in dichloromethane (40 ml). The title compound was isolated as a brownish solid (1.21 g, 6.0 mmol, 30%).

$^1\text{H}$  NMR (500 MHz, Chloroform-*d*)  $\delta$  7.99 (s, 1H), 7.13 (d,  $J = 1.9$  Hz, 1H), 6.98 (d,  $J = 2.0$  Hz, 1H), 6.89 (dd,  $J = 8.8, 2.3$  Hz, 1H), 3.87 (s, 2H), 3.66 (t,  $J = 7.1$  Hz, 2H), 3.14 (t,  $J = 7.0$  Hz, 2H).

### 5-chloro-3-(2-isocyanoethyl)-1H-indole (9c)

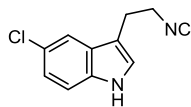

5-chlorotryptamine hydrochloric acid (2.8 g, 12.1 mmol) was mixed with ethyl formate (15 ml) and potassium carbonate (1.67 g, 12.1 mmol) and heated to reflux for 16 h. Water was added to the mixture and the product was extracted with ethyl acetate. After washing with brine, drying over sodium sulfate and concentrating *in vacuo*, the crude formamide was directly used without additional purification in the isocyanide synthesis. Following procedure A the isocyanide could be obtained using crude formamide, triethylamine (8.43 mL, 60.5 mmol) and phosphoryl chloride (1.69 mL, 18.2 mmol) in dichloromethane (24 ml). The title compound was isolated as a brownish solid (0.52 g, 2.54 mmol, 21%).

$^1\text{H}$  NMR (500 MHz,  $\text{CDCl}_3$ )  $\delta$  8.14 (s, 1H), 7.51 (d,  $J = 1.8$  Hz, 1H), 7.31 (d,  $J = 8.6$  Hz, 1H), 7.23 – 7.13 (m, 2H), 3.66 (tt,  $J = 6.9, 1.8$  Hz, 2H), 3.12 (td,  $J = 6.9, 3.7$  Hz, 2H).

### 3-(2-isocyanoethyl)-1-methyl-1H-indole (9d)

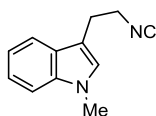

According to procedure A the formamide was prepared using 1-methyltryptamine (1.23 g, 7 mmol) and ethyl formate (10 ml). Subsequently, the isocyanide could be obtained using crude formamide, triethylamine (4.9 ml, 35 mmol) and phosphoryl chloride (0.98 mL, 10.5 mmol) in dichloromethane (14 ml). The title compound was isolated as a colorless oil (0.38 g, 2.06 mmol, 29%).

$^1\text{H}$  NMR (500 MHz,  $\text{CDCl}_3$ )  $\delta$  7.54 (d,  $J = 7.9$  Hz, 1H), 7.33 (d,  $J = 8.2$  Hz, 1H), 7.25 (t,  $J = 7.6$  Hz, 2H), 7.14 (t,  $J = 7.5$  Hz, 1H), 7.01 (s, 1H), 3.78 (s, 3H), 3.65 (tt,  $J = 7.1, 1.8$  Hz, 2H), 3.16 (tt,  $J = 7.0, 3.8, 1.5$  Hz, 2H).

### 3-(2-isocyanoethyl)-2-methyl-1H-indole (9e)

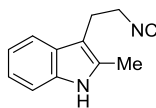

According to procedure A the formamide was prepared using 2-methyltryptamine (1.66 g, 9.5 mmol) and ethyl formate (13 ml). Subsequently, the isocyanide could be obtained using crude formamide, triethylamine (6.63 ml, 47.6 mmol) and phosphoryl chloride (1.33 mL, 14.3 mmol) in dichloromethane (14 ml). The title compound was isolated as a colorless oil (1.26 g, 6.84 mmol, 72%).

$^1\text{H}$  NMR (500 MHz,  $\text{CDCl}_3$ )  $\delta$  7.87 (s, 1H), 7.44 (d,  $J = 7.6$  Hz, 1H), 7.30 (d,  $J = 7.9$  Hz, 1H), 7.17 – 7.13 (m, 1H), 7.12 – 7.08 (m, 1H), 3.59 (tt,  $J = 7.2, 1.8$  Hz, 2H), 3.13 (tt,  $J = 7.1, 2.0$  Hz, 2H), 2.45 (s, 3H).

### General procedure B: interrupted Ugi reaction to form spiroindolines.

To a solution of isocyanide **1** (1.0 equiv) in TFE (0.1M) was added amine (1.1 equiv) and aldehyde (1.1 equiv). The reaction mixture was stirred at room temperature for 16 – 48 h (isocyanide consumption monitored with TLC). Afterwards the reaction was concentrated *in vacuo*. Purification by silica gel chromatography afforded the desired product with an eluent system of either mixtures of MeOH/ $\text{CH}_2\text{Cl}_2$  or cyclohexane/EtOAc.

#### 4,5-diphenyl-1,2,4,5,5a,6-hexahydropyrrolo[3',2':3,4]pyrrolo[2,3-b]indole (8aa)

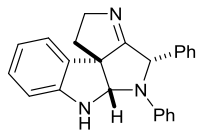

Prepared from isocyanide **1a** (170 mg, 1.0 mmol), aniline (100  $\mu$ L, 1.1 mmol) and benzaldehyde (112  $\mu$ L, 1.1 mmol) according to general procedure B within 48 h. Purification: column chromatography on silicagel (cyclohexane/EtOAc 4:1,  $R_f$  = 0.31 in cyclohexane/EtOAc 4:1). Isolated as yellow foamy solids (155 mg, 0.44 mmol, 44%).

$^1\text{H}$  NMR (500 MHz,  $\text{CDCl}_3$ )  $\delta$  7.24 (d,  $J$  = 7.6 Hz, 2H), 7.02 (dd,  $J$  = 12.5, 5.4 Hz, 6H), 6.81 (t,  $J$  = 7.3 Hz, 1H), 6.69 – 6.61 (m, 4H), 6.51 (t,  $J$  = 7.4 Hz, 1H), 5.35 (s, 1H), 5.25 (s, 1H), 5.10 (s, 1H), 4.42 – 4.29 (m, 2H), 2.49 – 2.41 (m, 1H), 2.33 (dd,  $J$  = 12.3, 5.0 Hz, 1H);  $^{13}\text{C}$  NMR (126 MHz,  $\text{CDCl}_3$ )  $\delta$  182.8 ( $\text{C}_q$ ), 148.8 ( $\text{C}_q$ ), 145.2 ( $\text{C}_q$ ), 137.7 ( $\text{C}_q$ ), 130.4 (CH), 129.9 (CH), 129.0 (CH), 128.3 (CH), 127.2 (CH), 125.4 (CH), 123.4 (CH), 120.3 (CH), 118.3 (CH), 112.3 (CH), 110.6 (CH), 79.9 (CH), 67.6 ( $\text{C}_q$ ), 65.8 ( $\text{CH}_2$ ), 64.3 (CH), 38.7 ( $\text{CH}_2$ ); IR (neat):  $\nu_{\text{max}}$  ( $\text{cm}^{-1}$ ) = 2923 (s), 2354 (s), 1678 (s), 1593 (m), 1500 (m), 1483 (m), 1468 (m), 1313 (s), 740 (l), 725 (l); HRMS (ESI):  $m/z$  calculated for  $\text{C}_{24}\text{H}_{22}\text{N}_3$   $[\text{M}+\text{H}]^+$  352.1808, found: 352.1798.

#### 4-(2-bromophenyl)-5-(4-methoxyphenyl)-1,2,4,5,5a,6-hexahydropyrrolo[3',2':3,4]pyrrolo[2,3-b]indole (8ab)

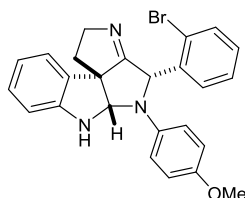

Prepared from isocyanide **1a** (170 mg, 1.0 mmol), *p*-anisidine (135  $\mu$ L, 1.1 mmol) and 2-bromobenzaldehyde (148  $\mu$ L, 1.1 mmol) according to general procedure B within 48 h. Purification: column chromatography on silicagel (cyclohexane/EtOAc 4:1,  $R_f$  = 0.28 in cyclohexane/EtOAc 4:1). Isolated as a brown oil (170 mg, 0.37 mmol, 37%).

$^1\text{H}$  NMR (300 MHz,  $\text{CDCl}_3$ )  $\delta$  7.51 (d,  $J$  = 8.0 Hz, 1H), 7.10 (t,  $J$  = 8.0 Hz, 1H), 6.92 (t,  $J$  = 8.4 Hz, 1H), 6.82 (d,  $J$  = 9.0 Hz, 2H), 6.76 – 6.72 (m, 2H), 6.67 (d,  $J$  = 8.8 Hz, 1H), 6.65 – 6.56 (m, 1H), 6.48 (t,  $J$  = 8.5 Hz, 3H), 5.68 (s, 1H), 5.29 (s, 1H), 5.10 (s, 1H), 4.40 (d,  $J$  = 7.1 Hz, 2H), 3.72 (s, 3H), 2.51 – 2.39 (m, 1H), 2.31 (dd,  $J$  = 12.8, 5.4 Hz, 1H);  $^{13}\text{C}$ -NMR (126 MHz,  $\text{CDCl}_3$ ):  $\delta$  181.8 ( $\text{C}_q$ ), 152.6 ( $\text{C}_q$ ), 148.9 ( $\text{C}_q$ ), 139.0 ( $\text{C}_q$ ), 136.6 ( $\text{C}_q$ ), 133.2 (CH), 130.7 ( $\text{C}_q$ ), 129.2 (CH), 128.9 (CH), 127.9 (CH), 127.2 (CH), 123.7 (CH), 122.4 (CH), 120.5 ( $\text{C}_q$ ), 115.4 (CH), 113.0 (CH), 110.7 (CH), 80.0 (CH), 68.3 ( $\text{C}_q$ ), 65.9 ( $\text{CH}_2$ ), 64.3 (CH), 55.8 ( $\text{CH}_3$ ), 38.9 ( $\text{CH}_2$ ); IR (neat):  $\nu_{\text{max}}$  ( $\text{cm}^{-1}$ ) = 2923 (s), 2354 (s), 1678 (s), 1593 (m), 1500 (m), 1483 (m), 1468 (m), 1313 (s), 740 (l), 725 (l); HRMS (ESI):  $m/z$  calculated for  $\text{C}_{25}\text{H}_{23}\text{BrN}_3\text{O}$   $[\text{M}+\text{H}]^+$  460.1019, found: 460.0937.

#### 5-(3-chlorophenyl)-4-(4-chlorophenyl)-1,2,4,5,5a,6-hexahydropyrrolo[3',2':3,4]pyrrolo [2,3-b]indole (8ac)

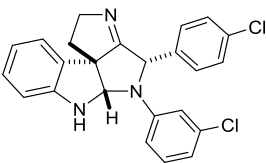

Prepared from isocyanide **1a** (170 mg, 1.0 mmol), 3-chloroaniline (116  $\mu$ L, 1.1 mmol) and 4-chlorobenzaldehyde (155 mg, 1.1 mmol) according to general procedure B in HFIP instead of TFE (reaction was finished within 1.5 h). Purification: column chromatography on silicagel (cyclohexane/EtOAc 4:1,  $R_f$  = 0.61 in cyclohexane/EtOAc 4:1). Isolated as yellow foamy solids (105 mg, 0.25 mmol, 25%).

$^1\text{H}$  NMR (500 MHz,  $\text{CDCl}_3$ )  $\delta$  7.11 (t,  $J$  = 8.1 Hz, 1H), 7.05 (t,  $J$  = 7.6 Hz, 1H), 6.98 (d,  $J$  = 8.4 Hz, 2H), 6.92 (d,  $J$  = 8.4 Hz, 2H), 6.78 (d,  $J$  = 7.9 Hz, 1H), 6.70 (d,  $J$  = 7.8 Hz, 1H), 6.66 (d,  $J$  = 7.5 Hz, 1H), 6.63 (s, 1H), 6.56 (t,

$J = 7.4$  Hz, 1H), 6.40 (d,  $J = 8.3$  Hz, 1H), 5.31 (s, 1H), 5.18 (s, 1H), 5.14 (s, 1H), 4.42 – 4.29 (m, 2H), 2.49 – 2.40 (m, 1H), 2.33 (dd,  $J = 12.6, 5.4$  Hz, 1H);  $^{13}\text{C}$  NMR (126 MHz,  $\text{CDCl}_3$ )  $\delta$  182.0 ( $\text{C}_q$ ), 148.4 ( $\text{C}_q$ ), 146.2 ( $\text{C}_q$ ), 135.8 ( $\text{C}_q$ ), 135.6 ( $\text{C}_q$ ), 133.1 (CH), 130.9 ( $\text{C}_q$ ), 130.1 (CH), 129.2 (CH), 128.6 (CH), 126.8 (CH), 123.3 (CH), 120.7 (CH), 118.5 (CH), 112.1 (CH), 110.9 (CH), 110.7 (CH), 80.0 (CH), 67.7 ( $\text{C}_q$ ), 65.7 ( $\text{CH}_2$ ), 63.6 (CH), 38.7 ( $\text{CH}_2$ ); IR (neat):  $\nu_{\text{max}}$  ( $\text{cm}^{-1}$ ) = 2930 (s), 2341 (s), 1593 (l), 1485 (l), 1406 (m), 1265 (s), 1092 (s), 1026 (s), 908 (s), 729 (l); HRMS (ESI):  $m/z$  calculated for  $\text{C}_{24}\text{H}_{20}\text{Cl}_2\text{N}_3$   $[\text{M}+\text{H}]^+$  420.1029, found: 420.1011.

#### 4-benzyl-5-(4-methoxyphenyl)-1,2,4,5,6a,6-hexahydropyrrolo[3',2':3,4]pyrrolo[2,3-b]indole (8ad)

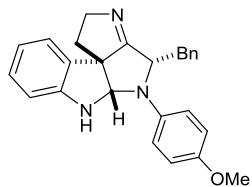

Prepared from isocyanide **1a** (170 mg, 1.0 mmol), *p*-anisidine (135  $\mu\text{L}$ , 1.1 mmol) and phenylacetaldehyde (128  $\mu\text{L}$ , 1.1 mmol) according to general procedure B within 24 h. Purification: column chromatography on silicagel (cyclohexane/EtOAc 4:1,  $R_f = 0.35$  in cyclohexane/EtOAc 4:1). Isolated as a brown oil (249 mg, 0.63 mmol, 63%).

$^1\text{H}$  NMR (500 MHz,  $\text{CDCl}_3$ )  $\delta$  7.28 (d,  $J = 8.2$  Hz, 2H), 7.23 – 7.14 (m, 3H), 7.07 (d,  $J = 7.3$  Hz, 2H), 6.92 (d,  $J = 8.8$  Hz, 2H), 6.88 (t,  $J = 7.4$  Hz, 1H), 6.72 (d,  $J = 7.7$  Hz, 1H), 6.67 (d,  $J = 8.9$  Hz, 2H), 5.18 (s, 1H), 4.88 (s, 1H), 4.44 – 4.32 (m, 2H), 4.26 (dd,  $J = 14.6, 7.8$  Hz, 1H), 3.79 (s, 3H), 3.02 (dd,  $J = 13.7, 3.9$  Hz, 1H), 2.43 – 2.33 (m, 2H), 2.10 – 1.98 (m, 1H);  $^{13}\text{C}$  NMR (126 MHz,  $\text{CDCl}_3$ )  $\delta$  181.9 ( $\text{C}_q$ ), 152.0 ( $\text{C}_q$ ), 148.9 ( $\text{C}_q$ ), 138.8 ( $\text{C}_q$ ), 137.3 ( $\text{C}_q$ ), 131.1 ( $\text{C}_q$ ), 129.3 (CH), 129.2 (CH), 128.6 (CH), 126.8 (CH), 123.1 (CH), 120.3 (CH), 115.7 (CH), 111.9 (CH), 111.1 (CH), 79.9 (CH), 67.8 ( $\text{C}_q$ ), 65.8 ( $\text{CH}_2$ ), 60.7 (CH), 56.0 ( $\text{CH}_3$ ), 39.2 ( $\text{CH}_2$ ), 38.9 ( $\text{CH}_2$ ); IR (neat):  $\nu_{\text{max}}$  ( $\text{cm}^{-1}$ ) = 1678 (m), 1605 (s), 1508 (l), 1483 (m), 1466 (m), 1236 (m), 1036 (m), 812 (m), 740 (l), 698 (m); HRMS (ESI $^+$ ) calculated  $\text{C}_{26}\text{H}_{26}\text{N}_3\text{O}$   $[\text{M}+\text{H}]^+$  396.2070, found 396.2068.

#### 4-(tert-butyl)-2,4,5a,6-tetrahydro-1H-pyrrolo[3',2':3,4]furo[2,3-b]indole (11ae)

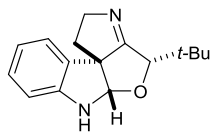

Prepared from isocyanide **1a** (170 mg, 1.0 mmol) and pivaldehyde (119  $\mu\text{L}$ , 1.1 mmol) and 6-amino-2-picoline (119 mg, 1.1 mmol) according to general procedure B within 24 h. Purification: column chromatography on silicagel (cyclohexane/EtOAc 6:1,  $R_f = 0.65$  in cyclohexane/EtOAc 4:1). Isolated as a yellow oil (95 mg, 0.37 mmol, 37%).

$^1\text{H}$  NMR (500 MHz,  $\text{CDCl}_3$ )  $\delta$  7.14 (t,  $J = 8.3$  Hz, 1H), 7.08 (d,  $J = 7.4$  Hz, 1H), 6.78 (t,  $J = 7.8$  Hz, 1H), 6.70 (d,  $J = 7.8$  Hz, 1H), 5.25 (s, 1H), 4.93 (s, 1H), 4.57 – 4.43 (m, 2H), 3.88 (d,  $J = 3.3$  Hz, 1H), 2.31 – 2.24 (m, 1H), 2.20 (dd,  $J = 12.6, 5.8$  Hz, 1H), 1.03 (s, 9H);  $^{13}\text{C}$  NMR (126 MHz,  $\text{CDCl}_3$ )  $\delta$  185.3 ( $\text{C}_q$ ), 148.2 ( $\text{C}_q$ ), 130.1 ( $\text{C}_q$ ), 128.9 (CH), 123.0 (CH), 119.7 (CH), 109.7 (CH), 93.2 (CH), 80.9 (CH), 70.5 ( $\text{C}_q$ ), 67.6 ( $\text{CH}_2$ ), 36.5 ( $\text{CH}_2$ ), 34.0 ( $\text{C}_q$ ), 25.5 ( $\text{CH}_3$ ); IR (neat):  $\nu_{\text{max}}$  ( $\text{cm}^{-1}$ ) = 3340 (m), 2955 (s), 1670 (m), 1608 (m), 1470 (m), 1254 (s), 1178 (s), 970 (m), 945 (m), 864 (m), 742 (l); HRMS (ESI):  $m/z$  calculated for  $\text{C}_{16}\text{H}_{21}\text{N}_2\text{O}$   $[\text{M}+\text{H}]^+$  257.1648, found 257.1636.

#### 4-(tert-butyl)-5-(2-(5-methoxy-1H-indol-3-yl)ethyl)-1,2,4,5,5a,6-hexahydropyrrolo[3',2':3,4]pyrrolo[2,3-b]indole (8af)

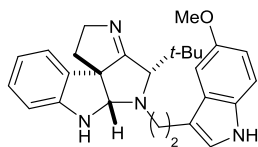

Prepared from isocyanide **1a** (170 mg, 1.0 mmol), 5-methoxytryptamine (209 mg, 1.1 mmol) and pivaldehyde (119  $\mu$ L, 1.1 mmol) according to general procedure B within 16 h. Purification: column chromatography on silicagel (cyclohexane/EtOAc 4:1,  $R_f$  = 0.20 in cyclohexane/EtOAc 4:1). Isolated as a light brown oil (304 mg, 0.71 mmol, 71%).

$^1\text{H}$  NMR (500 MHz,  $\text{CDCl}_3$ )  $\delta$  8.19 (s, 1H), 7.34 (d,  $J$  = 8.0 Hz, 1H), 7.20 – 7.12 (m, 2H), 7.10 (d,  $J$  = 7.6 Hz, 2H), 6.96 (dd,  $J$  = 8.8, 2.3 Hz, 1H), 6.81 (t,  $J$  = 7.4 Hz, 1H), 6.67 (d,  $J$  = 7.8 Hz, 1H), 4.59 – 4.45 (m, 1H), 4.43 – 4.34 (m, 2H), 3.93 (s, 3H), 3.30 – 3.24 (m, 2H), 3.16 – 3.07 (m, 2H), 2.46 – 2.35 (m, 1H), 2.31 (dd,  $J$  = 12.3, 5.4 Hz, 1H), 0.81 (s, 9H);  $^{13}\text{C}$  NMR (126 MHz,  $\text{CDCl}_3$ )  $\delta$  187.7 ( $\text{C}_q$ ), 154.0 ( $\text{C}_q$ ), 149.1 ( $\text{C}_q$ ), 131.2 ( $\text{C}_q$ ), 128.5 (CH), 127.6 ( $\text{C}_q$ ), 123.6 (CH), 122.6 (CH), 119.4 (CH), 113.3 (CH), 112.4 ( $\text{C}_q$ ), 112.0 (CH), 110.4 (CH), 100.2 (CH), 86.6 (CH), 74.0 (CH), 69.1 ( $\text{C}_q$ ), 66.0 ( $\text{CH}_2$ ), 58.3 ( $\text{CH}_2$ ), 55.8 ( $\text{CH}_3$ ), 41.5 ( $\text{CH}_2$ ), 35.4 ( $\text{C}_q$ ), 29.8 ( $\text{C}_q$ ), 27.1 ( $\text{CH}_3$ ), 25.2 ( $\text{CH}_2$ ); IR (neat):  $\nu_{\text{max}}$  ( $\text{cm}^{-1}$ ) = 2926 (m), 1655 (m), 1605 (m), 1483 (m), 1464 (m), 1213 (m), 1103 (s), 1094 (s), 1026 (m), 740 (l); HRMS (ESI):  $m/z$  calculated for  $\text{C}_{27}\text{H}_{33}\text{N}_4\text{O}$   $[\text{M}+\text{H}]^+$  429.2649, found 429.2643.

#### 4-(tert-butyl)-5-isopropyl-1,2,4,5,5a,6-hexahydropyrrolo[3',2':3,4]pyrrolo[2,3-b]indole (8ag)

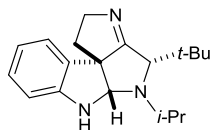

Prepared from isocyanide **1a** (170 mg, 1.0 mmol), isopropylamine (95  $\mu$ L, 1.1 mmol) and pivaldehyde (119  $\mu$ L, 1.1 mmol) according to general procedure B within 16 h. Evaporation of the solvent and excess starting materials afforded the compound as an orange solid (294 mg, 0.99 mmol, 99%). No further purification was required.

$^1\text{H}$  NMR (500 MHz,  $\text{CDCl}_3$ )  $\delta$  7.06 (t,  $J$  = 7.7 Hz, 1H), 7.00 (d,  $J$  = 7.5 Hz, 1H), 6.70 (t,  $J$  = 7.3 Hz, 1H), 6.61 (d,  $J$  = 7.7 Hz, 1H), 4.53 (s, 1H), 4.45 – 4.34 (m, 1H), 4.26 (dd,  $J$  = 14.5, 7.7 Hz, 1H), 3.24 (s, 1H), 3.17 – 3.04 (m, 1H), 2.29 (d,  $J$  = 5.2 Hz, 2H), 1.24 (d,  $J$  = 6.8 Hz, 3H), 1.00 (d,  $J$  = 6.3 Hz, 3H), 0.63 (s, 9H).  $^{13}\text{C}$  NMR (126 MHz,  $\text{CDCl}_3$ )  $\delta$  188.2 ( $\text{C}_q$ ), 149.8 ( $\text{C}_q$ ), 131.2 ( $\text{C}_q$ ), 128.8 (CH), 123.5 (CH), 119.4 (CH), 110.2 (CH), 77.6 (CH), 72.2 (CH), 68.8 ( $\text{C}_q$ ), 66.1 ( $\text{CH}_2$ ), 53.2 (CH), 41.8 ( $\text{CH}_2$ ), 35.3 ( $\text{C}_q$ ), 27.0 ( $\text{CH}_3$ ), 23.4 ( $\text{CH}_3$ ), 15.3 ( $\text{CH}_3$ ); IR (neat):  $\nu_{\text{max}}$  ( $\text{cm}^{-1}$ ) = 3275 (s), 2962 (s), 1653 (m), 1605 (m), 1460 (m), 1263 (s), 1164 (m), 1045 (s), 966 (m), 854 (s), 737 (l); HRMS (ESI):  $m/z$  calculated for  $\text{C}_{19}\text{H}_{28}\text{N}_3$   $[\text{M}+\text{H}]^+$  298.2278, found: 298.2267

#### 5-benzyl-4-(tert-butyl)-1,2,4,5,5a,6-hexahydropyrrolo[3',2':3,4]pyrrolo[2,3-b]indole (8ah)

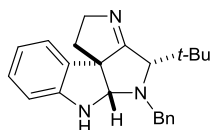

Prepared from isocyanide **1a** (170 mg, 1.0 mmol), benzylamine (120  $\mu$ L, 1.1 mmol) and pivaldehyde (119  $\mu$ L, 1.1 mmol) according to general procedure B within 16 h. Purification: column chromatography on silicagel (cyclohexane/EtOAc 4:1,  $R_f$  = 0.43 in cyclohexane/EtOAc 4:1). Isolated as a yellow solid (307 mg, 0.89 mmol, 89%).

m.p.: 140–144  $^\circ\text{C}$ ;  $^1\text{H}$  NMR (500 MHz,  $\text{CDCl}_3$ )  $\delta$  7.46 (d,  $J$  = 7.2 Hz, 2H), 7.40 (t,  $J$  = 7.4 Hz, 2H), 7.34 (t,  $J$  = 7.2 Hz, 1H), 7.03 (t,  $J$  = 7.6 Hz, 1H), 6.99 (d,  $J$  = 7.3 Hz, 1H), 6.69 (t,  $J$  = 7.2 Hz, 1H), 6.44 (d,  $J$  = 7.8 Hz, 1H), 4.47 – 4.38 (m, 1H), 4.32 (dd,  $J$  = 14.8, 8.4 Hz, 1H), 4.26 – 4.18 (m, 2H), 3.85 (d,  $J$  = 13.4 Hz, 1H), 3.27 (s, 1H), 2.37 – 2.29 (m, 1H), 2.16 (dd,  $J$  = 12.3, 5.3 Hz, 1H), 0.80 (s, 9H);  $^{13}\text{C}$  NMR (126 MHz,  $\text{CDCl}_3$ )  $\delta$  187.6



(C<sub>q</sub>), 148.8 (C<sub>q</sub>), 139.7 (C<sub>q</sub>), 130.8 (C<sub>q</sub>), 128.8 (CH), 128.8 (CH), 128.4 (CH), 127.7 (CH), 123.7 (CH), 119.0 (CH), 110.0 (CH), 87.7 (CH), 73.5 (CH), 69.1 (C<sub>q</sub>), 65.9 (CH<sub>2</sub>), 62.1 (CH<sub>2</sub>), 41.0 (CH<sub>2</sub>), 35.7 (C<sub>q</sub>), 27.2 (CH<sub>3</sub>); IR (neat):  $\nu_{\max}$  (cm<sup>-1</sup>) = 2951 (s), 2866 (s), 1657 (m), 1605 (m), 1479 (s), 1464 (m), 1086 (s), 1049 (s), 926 (s), 752, (l), 743 (l); HRMS (ESI):  $m/z$  calculated for C<sub>23</sub>H<sub>28</sub>N<sub>3</sub> [M+H]<sup>+</sup> 346.2278, found: 346.2266.

**(4S,5aS,10bS)-4-(tert-butyl)-5-(thiophen-2-ylmethyl)-1,2,4,5,5a,6-hexahydropyrrolo[3',2':3,4]pyrrolo[2,3-b]indole (8ai)**

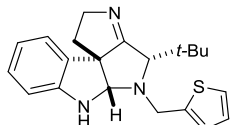

Prepared from isocyanide **1a** (170 mg, 1.0 mmol), 2-thiophenemethylamine (112  $\mu$ L, 1.1 mmol) and pivaldehyde (120  $\mu$ L, 1.1 mmol) according to general procedure B within 16 h. Purification: column chromatography on silicagel (cyclohexane/EtOAc 4:1, R<sub>f</sub> = 0.13 in cyclohexane/EtOAc 5:1). Isolated as a yellow oil (246 mg, 0.70 mmol, 70%).

<sup>1</sup>H NMR (500 MHz, CDCl<sub>3</sub>)  $\delta$  7.30 (d,  $J$  = 5.0 Hz, 1H), 7.07 – 7.01 (m, 2H), 7.01 – 6.97 (m, 2H), 6.70 (t,  $J$  = 7.4 Hz, 1H), 6.51 (d,  $J$  = 7.8 Hz, 1H), 4.46 – 4.36 (m, 1H), 4.35 – 4.27 (m, 2H), 4.25 – 4.14 (m, 2H), 3.94 (s, 1H), 3.28 (s, 1H), 2.38 – 2.26 (m, 1H), 2.18 (dd,  $J$  = 12.3, 5.4 Hz, 1H), 0.78 (s, 9H); <sup>13</sup>C NMR (126 MHz, CDCl<sub>3</sub>)  $\delta$  187.35 (C<sub>q</sub>), 149.02 (C<sub>q</sub>), 143.13 (C<sub>q</sub>), 130.90 (C<sub>q</sub>), 128.57 (CH), 126.91 (CH), 126.13 (CH), 125.65 (CH), 123.67 (CH), 119.24 (CH), 110.27 (CH), 87.40 (CH), 73.14 (CH), 69.17 (C<sub>q</sub>), 66.09 (CH<sub>2</sub>), 56.23 (CH<sub>2</sub>), 41.18 (CH<sub>2</sub>), 35.65 (C<sub>q</sub>), 27.17 (CH<sub>3</sub>); IR (neat):  $\nu_{\max}$  (cm<sup>-1</sup>) = 2951 (m), 2868 (s), 1736 (m), 1655 (m), 1605 (m), 1481 (m), 1464 (l), 1393 (s), 1310 (s), 1240 (m), 1090 (m), 1047 (m), 1026 (m), 1007 (m), 852 (m), 802 (l), 740 (l); HRMS (ESI):  $m/z$  calculated for C<sub>21</sub>H<sub>26</sub>N<sub>3</sub>S [M+H]<sup>+</sup> 352.1842, found: 352.1845

**(4S,5aS,10bS)-5-(2,2-dimethoxyethyl)-4-(1-methylcyclohexyl)-1,2,4,5,5a,6-hexahydropyrrolo[3',2':3,4]pyrrolo[2,3-b]indole (8aj)**

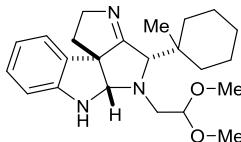

Prepared from isocyanide **1a** (170 mg, 1.0 mmol), aminoacetaldehyde dimethyl acetal (120  $\mu$ L, 1.1 mmol) and 1-methylcyclohexane-1-carboxaldehyde (139 mg, 1.1 mmol) according to general procedure B within 16 h. Purification: column chromatography on silicagel (cyclohexane/EtOAc 3:1, R<sub>f</sub> = 0.44 in cyclohexane/EtOAc 2:1). Isolated as a yellow oil (281 mg, 0.73 mmol, 73%).

<sup>1</sup>H NMR (500 MHz, CDCl<sub>3</sub>)  $\delta$  7.02 (t,  $J$  = 7.5 Hz, 1H), 6.93 (d,  $J$  = 7.3 Hz, 1H), 6.64 (t,  $J$  = 7.3 Hz, 1H), 6.58 (d,  $J$  = 7.7 Hz, 1H), 5.15 (s, 1H), 4.50 (d,  $J$  = 5.2 Hz, 1H), 4.44 – 4.30 (m, 1H), 4.26 (dd,  $J$  = 14.7, 8.3 Hz, 1H), 4.14 (s, 1H), 3.44 (s, 3H), 3.34 (s, 3H), 3.18 (s, 1H), 3.12 (dd,  $J$  = 14.2, 7.3 Hz, 1H), 2.89 (d,  $J$  = 14.0 Hz, 1H), 2.29 (q,  $J$  = 10.8, 10.2 Hz, 1H), 2.18 (dd,  $J$  = 12.1, 5.2 Hz, 1H), 1.51 – 1.36 (m, 2H), 1.36 – 1.29 (m, 1H), 1.28 – 0.97 (m, 7H), 0.45 (s, 3H); <sup>13</sup>C NMR (126 MHz, CDCl<sub>3</sub>)  $\delta$  187.48 (C<sub>q</sub>), 149.30 (C<sub>q</sub>), 131.00 (C<sub>q</sub>), 128.47 (CH), 123.49 (CH), 118.73 (CH), 109.88 (CH), 104.69 (CH), 88.84 (CH), 76.54 (CH), 69.14 (C<sub>q</sub>), 66.00 (CH<sub>2</sub>), 60.40 (CH<sub>2</sub>), 53.59 (CH<sub>3</sub>), 53.12 (CH<sub>3</sub>), 41.26 (CH<sub>2</sub>), 38.12 (C<sub>q</sub>), 35.15 (CH<sub>2</sub>), 34.79 (CH<sub>2</sub>), 26.15 (CH<sub>2</sub>), 21.73 (CH<sub>2</sub>), 21.66 (CH<sub>2</sub>), 19.28 (CH<sub>3</sub>); IR (neat):  $\nu_{\max}$  (cm<sup>-1</sup>) = 2926 (m), 2860 (s), 1655 (m), 1604 (m), 1466 (m), 1310 (s), 1267 (s), 1190 (s), 1115 (m), 1057 (m), 964 (m), 947 (m), 858 (s); HRMS (ESI):  $m/z$  calculated for C<sub>23</sub>H<sub>34</sub>N<sub>3</sub>O<sub>2</sub> [M+H]<sup>+</sup> 384.2646, found: 384.2655

**(4*S*,5*aS*,10*bS*)-4-(1-methylcyclohexyl)-5-phenethyl-1,2,4,5,5*a*,6-hexahydropyrrolo[3',2':3,4]pyrrolo[2,3-*b*]indole (8ak)**

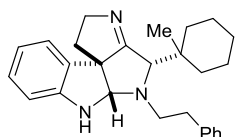

Prepared from isocyanide **1a** (170 mg, 1.0 mmol), phenethylamine (119  $\mu$ L, 1.1 mmol) and 1-methylcyclohexane-1-carboxaldehyde (139 mg, 1.1 mmol) according to general procedure B within 16 h. Purification: column chromatography on silicagel (cyclohexane/EtOAc 4:1,  $R_f$  = 0.40 in cyclohexane/EtOAc 4:1). Isolated as a yellow oil (332 mg, 0.83 mmol, 83%).

$^1\text{H}$  NMR (500 MHz,  $\text{CDCl}_3$ )  $\delta$  7.33 (t,  $J$  = 7.5 Hz, 2H), 7.26 – 7.20 (m, 3H), 7.08 (t,  $J$  = 7.6 Hz, 1H), 7.00 (d,  $J$  = 7.3 Hz, 1H), 6.73 (t,  $J$  = 7.4 Hz, 1H), 6.62 (d,  $J$  = 7.8 Hz, 1H), 4.48 – 4.36 (m, 1H), 4.35 – 4.26 (m, 2H), 4.16 (s, 1H), 3.29 (s, 1H), 3.16 (dt,  $J$  = 13.2, 7.8 Hz, 1H), 3.12 – 3.03 (m, 1H), 2.91 (t,  $J$  = 8.0 Hz, 2H), 2.31 (ddd,  $J$  = 12.3, 10.7, 8.1 Hz, 1H), 2.24 (dd,  $J$  = 12.2, 5.5 Hz, 1H), 1.54 – 1.40 (m, 2H), 1.40 – 1.19 (m, 5H), 1.19 – 0.99 (m, 3H), 0.52 (s, 3H);  $^{13}\text{C}$  NMR (126 MHz,  $\text{CDCl}_3$ )  $\delta$  187.67 ( $\text{C}_q$ ), 149.15 ( $\text{C}_q$ ), 139.60 ( $\text{C}_q$ ), 131.17 ( $\text{C}_q$ ), 128.80 (CH), 128.63 (CH), 128.58 (CH), 126.39 (CH), 119.46 (CH), 110.36 (CH), 86.62 (CH), 74.65 (CH), 69.18 ( $\text{C}_q$ ), 66.06 ( $\text{CH}_2$ ), 59.92 ( $\text{CH}_2$ ), 41.73 ( $\text{CH}_2$ ), 38.19 ( $\text{C}_q$ ), 35.60 ( $\text{CH}_2$ ), 35.14 ( $\text{CH}_2$ ), 34.69 ( $\text{CH}_2$ ), 26.19 ( $\text{CH}_2$ ), 21.83 ( $\text{CH}_2$ ), 21.73 ( $\text{CH}_2$ ), 19.63 ( $\text{CH}_3$ ); IR (neat):  $\nu_{\text{max}}$  ( $\text{cm}^{-1}$ ) = 2926 (l), 2860 (m), 2363 (l), 1654 (m), 1605 (m), 1483 (m), 1466 (m), 1259 (s), 1111 (m), 1094 (s), 964 (m), 698 (m); HRMS (ESI):  $m/z$  calculated for  $\text{C}_{27}\text{H}_{34}\text{N}_3$  [ $\text{M}+\text{H}$ ] $^+$  400.2747, found: 400.2762

**N-(tert-butyl)-1-(4,9-dihydro-3H-pyrido[3,4-*b*]indol-1-yl)-3-methylbutan-1-amine (8al)**

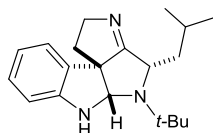

Prepared from isocyanide **1a** (170 mg, 1.0 mmol), *tert*-butylamine (116  $\mu$ L, 1.1 mmol) and isovaleraldehyde (118  $\mu$ L, 1.1 mmol) according to general procedure B within 16 h. Purification: column chromatography on silicagel (cyclohexane/EtOAc 4:1,  $R_f$  = 0.29 in cyclohexane/EtOAc 4:1). Isolated as a yellow oil (125 mg, 0.40 mmol, 40%).

$^1\text{H}$  NMR (500 MHz,  $\text{DMSO}-d_6$ )  $\delta$  6.98 (t,  $J$  = 7.6 Hz, 1H), 6.92 (d,  $J$  = 7.3 Hz, 1H), 6.56 (d,  $J$  = 7.8 Hz, 1H), 6.53 (t,  $J$  = 7.3 Hz, 1H), 4.49 (s, 1H), 4.29 – 4.20 (m, 1H), 4.10 (dd,  $J$  = 14.6, 8.5 Hz, 1H), 3.51 (dd,  $J$  = 11.4, 4.9 Hz, 1H), 2.25 – 2.15 (m, 1H), 1.99 (dd,  $J$  = 12.4, 5.9 Hz, 1H), 1.49 – 1.37 (m, 1H), 1.05 (s, 9H), 0.98 (dq,  $J$  = 14.7, 5.0, 4.6 Hz, 1H), 0.83 (d,  $J$  = 6.5 Hz, 3H), 0.74 – 0.66 (m, 1H), 0.52 (d,  $J$  = 6.7 Hz, 3H);  $^{13}\text{C}$  NMR (126 MHz,  $\text{DMSO}-d_6$ )  $\delta$  185.4 ( $\text{C}_q$ ), 150.0 ( $\text{C}_q$ ), 131.3 ( $\text{C}_q$ ), 128.1 (CH), 122.0 (CH), 117.2 (CH), 109.2 (CH), 79.1 (CH), 67.3 ( $\text{C}_q$ ), 65.3 ( $\text{CH}_2$ ), 55.7 (CH), 54.1 ( $\text{CH}_2$ ), 47.1 ( $\text{CH}_2$ ), 27.6 ( $\text{CH}_3$ ), 24.6 (CH), 23.7 ( $\text{CH}_3$ ), 21.4 ( $\text{CH}_3$ ); IR (neat):  $\nu_{\text{max}}$  ( $\text{cm}^{-1}$ ) = 2359 (s), 1682 (s), 1593 (l), 1560 (s), 1485 (s), 1329 (s), 1090 (m), 1015 (m), 908 (s), 731 (m); HRMS (ESI):  $m/z$  calculated for  $\text{C}_{20}\text{H}_{30}\text{N}_3$  [ $\text{M}+\text{H}$ ] $^+$  312.2434, found: 312.2429.

Note: multiple peaks were not present in the  $^1\text{H}$  and  $^{13}\text{C}$  NMR spectrums or showed unclear splitting patterns when taken in  $\text{CDCl}_3$ .

#### 4-cyclohexyl-5-(2-methylallyl)-1,2,4,5,5a,6-hexahydropyrrolo[3',2':3,4]pyrrolo[2,3-b]indole (8am)

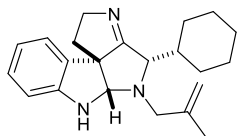

Prepared from isocyanide **1a** (170 mg, 1.0 mmol), 2-methylallylamine (100  $\mu$ L, 1.1 mmol) and cyclohexanecarboxaldehyde (133  $\mu$ L, 1.1 mmol) according to general procedure B within 16 h. Purification: column chromatography on silicagel (cyclohexane/EtOAc 5:1,  $R_f$  = 0.53 in cyclohexane/EtOAc 4:1). Isolated as a yellow oil (124 mg, 0.37 mmol, 37%).

$^1\text{H}$  NMR (500 MHz,  $\text{CDCl}_3$ )  $\delta$  7.08 (t,  $J$  = 7.5 Hz, 1H), 6.99 (d,  $J$  = 7.4 Hz, 1H), 6.72 (t,  $J$  = 7.3 Hz, 1H), 6.64 (d,  $J$  = 7.5 Hz, 1H), 4.98 (s, 1H), 4.88 (s, 1H), 4.44 – 4.33 (m, 1H), 4.29 (dd,  $J$  = 14.7, 8.5 Hz, 1H), 4.17 (s, 1H), 3.33 (d,  $J$  = 13.6 Hz, 1H), 3.24 (d,  $J$  = 13.5 Hz, 1H), 3.07 (d,  $J$  = 4.8 Hz, 1H), 2.29 (q,  $J$  = 11.8 Hz, 1H), 2.13 (dd,  $J$  = 12.4, 5.5 Hz, 1H), 1.77 (s, 3H), 1.73 (d,  $J$  = 10.8 Hz, 1H), 1.65 (s, 1H), 1.58 – 1.41 (m, 2H), 1.32 (d,  $J$  = 12.7 Hz, 1H), 1.17 – 0.95 (m, 4H), 0.85 (q,  $J$  = 12.5 Hz, 1H), 0.63 (q,  $J$  = 11.2 Hz, 1H);  $^{13}\text{C}$  NMR (126 MHz,  $\text{CDCl}_3$ )  $\delta$  186.9 (C<sub>q</sub>), 149.0 (C<sub>q</sub>), 144.9 (C<sub>q</sub>), 131.4 (C<sub>q</sub>), 128.4 (CH), 123.1 (CH), 119.2 (CH), 113.2 (C<sub>q</sub>), 110.2 (CH), 86.4 (CH), 69.3 (CH), 69.0 (C<sub>q</sub>), 66.0 (CH<sub>2</sub>), 62.3 (CH<sub>2</sub>), 41.9 (CH), 39.2 (CH<sub>2</sub>), 30.2 (CH<sub>2</sub>), 28.9 (CH<sub>2</sub>), 26.4 (CH<sub>2</sub>), 26.3 (CH<sub>2</sub>), 26.1 (CH<sub>2</sub>), 20.7 (CH<sub>3</sub>); IR (neat):  $\nu_{\text{max}}$  (cm<sup>-1</sup>) = 2924 (m), 2851 (s), 1664 (s), 1605 (m), 1481 (m), 1464 (m), 1447 (m), 1097 (s), 964 (m), 897 (m), 738 (l); HRMS (ESI):  $m/z$  calculated for C<sub>22</sub>H<sub>30</sub>N<sub>3</sub> [M+H]<sup>+</sup> 336.2434, found: 336.2428

#### (4S,5aS,10bS)-5-cyclohexyl-4-isopropyl-1,2,4,5,5a,6-hexahydropyrrolo[3',2':3,4]pyrrolo[2,3-b]indole (8an)

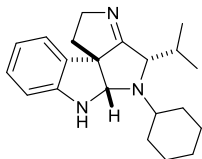

Prepared from isocyanide **1a** (170 mg, 1.0 mmol), cyclohexylamine (126  $\mu$ L, 1.1 mmol) and isobutyraldehyde (99  $\mu$ L, 1.1 mmol) according to general procedure B within 16 h. Purification: column chromatography on silicagel (cyclohexane/EtOAc 5:1,  $R_f$  = 0.21 in cyclohexane/EtOAc 5:1). Isolated as a yellow solid (155 mg, 0.48 mmol, 48%).

m.p.: 122-126  $^{\circ}\text{C}$ ;  $^1\text{H}$  NMR (500 MHz,  $\text{DMSO}-d_6$ )  $\delta$  6.97 – 6.90 (m, 2H), 6.49 (t,  $J$  = 7.5 Hz, 2H), 5.85 (s, 1H), 4.50 (s, 1H), 4.28 (ddd,  $J$  = 15.4, 10.3, 6.0 Hz, 1H), 4.11 (dd,  $J$  = 14.6, 8.4 Hz, 1H), 2.91 (d,  $J$  = 9.3 Hz, 1H), 2.56 (t,  $J$  = 10.7 Hz, 1H), 2.20 (ddd,  $J$  = 11.9, 10.2, 8.8 Hz, 1H), 2.02 (dd,  $J$  = 12.4, 5.7 Hz, 1H), 1.82 (d,  $J$  = 11.5 Hz, 1H), 1.78 – 1.68 (m, 2H), 1.68 – 1.60 (m, 1H), 1.56 (d,  $J$  = 11.9 Hz, 1H), 1.32 – 0.98 (m, 6H), 0.92 – 0.81 (m, 1H), 0.79 (d,  $J$  = 6.4 Hz, 3H), 0.55 (d,  $J$  = 6.5 Hz, 3H);  $^{13}\text{C}$  NMR (126 MHz,  $\text{DMSO}-d_6$ )  $\delta$  186.19 (C<sub>q</sub>), 150.37 (C<sub>q</sub>), 131.35 (C<sub>q</sub>), 128.58 (CH), 122.49 (CH), 117.45 (CH), 108.99 (CH), 79.91 (CH), 67.70 (C<sub>q</sub>), 67.12 (CH), 65.89 (CH<sub>2</sub>), 62.45 (CH), 40.01 (CH<sub>2</sub>), 33.47 (CH), 32.19 (CH<sub>2</sub>), 29.71 (CH<sub>2</sub>), 26.45 (CH<sub>2</sub>), 26.03 (CH<sub>2</sub>), 25.99 (CH<sub>2</sub>), 20.09 (CH<sub>3</sub>), 19.06 (CH<sub>3</sub>); IR (neat):  $\nu_{\text{max}}$  (cm<sup>-1</sup>) = 2922 (m), 2849 (m), 2336 (m), 1664 (m), 1605 (m), 1483 (m), 1466 (m), 1265 (s), 1053 (m), 1041 (m), 964 (m), 708 (m); HRMS (ESI):  $m/z$  calculated for C<sub>21</sub>H<sub>30</sub>N<sub>3</sub> [M+H]<sup>+</sup> 324.2434, found: 324.2436

Note: multiple peaks were not present in the  $^1\text{H}$  and  $^{13}\text{C}$  NMR spectrums or showed unclear splitting patterns when taken in  $\text{CDCl}_3$ .

### N,N-dibenzyl-1-(4',5'-dihydrospiro[indole-3,3'-pyrrol]-2'-yl)butan-1-amine (12aa)

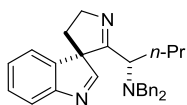

Prepared from isocyanide **1a** (170 mg, 1.0 mmol), dibenzylamine (212  $\mu\text{L}$ , 1.1 mmol) and valeraldehyde (99  $\mu\text{L}$ , 1.1 mmol) according to general procedure B within 16 h.

Purification: column chromatography on silicagel (cyclohexane/EtOAc 6:1,  $R_f$  = 0.60 in cyclohexane/EtOAc 4:1). Isolated as a yellow oil (278 mg, 0.66 mmol, 66%).

$^1\text{H}$  NMR (500 MHz,  $\text{CDCl}_3$ )  $\delta$  8.06 (s, 1H), 7.55 (d,  $J$  = 7.7 Hz, 1H), 7.33 – 7.25 (m, 6H), 7.21 (t,  $J$  = 7.2 Hz, 6H), 7.13 (t,  $J$  = 7.4 Hz, 1H), 7.04 (d,  $J$  = 7.4 Hz, 1H), 4.31 – 4.23 (m, 1H), 4.20 – 4.12 (m, 1H), 3.88 (d,  $J$  = 13.8 Hz, 2H), 3.39 (d,  $J$  = 13.8 Hz, 2H), 2.55 (d,  $J$  = 10.6 Hz, 1H), 2.43 – 2.35 (m, 1H), 2.14 – 2.07 (m, 1H), 2.02 – 1.85 (m, 2H), 1.48 – 1.40 (m, 1H), 1.30 – 1.16 (m, 1H), 0.72 – 0.65 (m, 3H);  $^{13}\text{C}$  NMR (126 MHz,  $\text{CDCl}_3$ )  $\delta$  174.4 ( $\text{C}_q$ ), 173.0 (CH), 155.5 ( $\text{C}_q$ ), 139.2 ( $\text{C}_q$ ), 138.8 ( $\text{C}_q$ ), 129.0 (CH), 128.3 (CH), 128.2 (CH), 126.8 (CH), 126.1 (CH), 121.5 (CH), 121.2 (CH), 74.0 ( $\text{C}_q$ ), 60.5 ( $\text{CH}_2$ ), 57.3 (CH), 54.1 ( $\text{CH}_2$ ), 31.8 ( $\text{CH}_2$ ), 25.0 ( $\text{CH}_2$ ), 19.6 ( $\text{CH}_2$ ), 13.9 ( $\text{CH}_3$ ); IR (neat):  $\nu_{\text{max}}$  ( $\text{cm}^{-1}$ ) = 2954 (s), 1634 (s), 1545 (s), 1495 (s), 1452 (m), 1375 (s), 1124 (m), 995 (s), 908 (s), 744 (l), 698 (l); HRMS (ESI):  $m/z$  calculated for  $\text{C}_{29}\text{H}_{32}\text{N}_3$   $[\text{M}+\text{H}]^+$  422.2591, found: 422.2587.

### 2'-(3-methyl-1-(pyrrolidin-1-yl)butyl)-4',5'-dihydrospiro[indole-3,3'-pyrrole] (12ab)

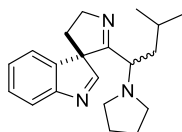

Prepared from isocyanide **1a** (170 mg, 1.0 mmol), pyrrolidine (92  $\mu\text{L}$ , 1.1 mmol) and aldehyde isovaleraldehyde (118  $\mu\text{L}$ , 1.1 mmol) according to general procedure B within 16 h. Purification: column chromatography on silicagel (4% MeOH in  $\text{CH}_2\text{Cl}_2$ ,  $R_f$  = 0.19 in cyclohexane/EtOAc 4:1). Isolated as a brown oil (279 mg, 0.90 mmol, 90%) as a mixture

of diastereoisomers (2.6:1 based on  $^1\text{H}$  NMR).

**Major diastereoisomer:**  $^1\text{H}$  NMR (500 MHz,  $\text{CDCl}_3$ )  $\delta$  7.97 (s, 1H), 7.60 (d,  $J$  = 7.7 Hz, 1H), 7.34 (t,  $J$  = 7.6 Hz, 1H), 7.23 (d,  $J$  = 7.3 Hz, 1H), 7.21 – 7.14 (m, 1H), 4.30 – 4.18 (m, 2H), 2.97 (dd,  $J$  = 10.1, 4.7 Hz, 1H), 2.64 – 2.49 (m, 1H), 2.48 – 2.28 (m, 4H), 2.03 – 1.97 (m, 1H), 1.68 – 1.54 (m, 4H), 1.31 – 1.24 (m, 1H), 1.07 (ddd,  $J$  = 13.9, 9.9, 5.1 Hz, 1H), 0.79 (d,  $J$  = 6.5 Hz, 3H), 0.69 (ddd,  $J$  = 13.9, 10.5, 3.9 Hz, 1H), 0.37 (d,  $J$  = 6.6 Hz, 3H);  $^{13}\text{C}$ -NMR (126 MHz,  $\text{CDCl}_3$ )  $\delta$  178.5 ( $\text{C}_q$ ), 173.7 (CH), 155.0 ( $\text{C}_q$ ), 139.7 ( $\text{C}_q$ ), 128.3 (CH), 126.0 (CH), 121.9 (CH), 121.1 (CH), 72.6 ( $\text{C}_q$ ), 63.5 (CH), 60.1 ( $\text{CH}_2$ ), 50.8 ( $\text{CH}_2$ ), 39.0 ( $\text{CH}_2$ ), 33.5 ( $\text{CH}_2$ ), 24.8 (CH), 23.3 ( $\text{CH}_2$ ), 23.2 ( $\text{CH}_3$ ), 22.2 ( $\text{CH}_3$ ); **Minor diastereoisomer:**  $^1\text{H}$  NMR (500 MHz,  $\text{CDCl}_3$ )  $\delta$  7.90 (s, 1H), 7.60 (d,  $J$  = 7.7 Hz, 1H), 7.34 (t,  $J$  = 7.2 Hz, 1H), 7.21 – 7.13 (m, 2H), 4.28 – 4.19 (m, 2H), 2.64 – 2.49 (m, 2H), 2.47 – 2.29 (m, 4H), 2.20 – 2.12 (m, 1H), 1.77 (ddd,  $J$  = 14.4, 9.6, 5.1 Hz, 1H), 1.69 – 1.55 (m, 4H), 1.40 – 1.30 (m, 1H), 1.13 (ddd,  $J$  = 13.5, 9.0, 4.4 Hz, 1H), 0.75 (d,  $J$  = 6.6 Hz, 3H), 0.43 (d,  $J$  = 6.6 Hz, 3H);  $^{13}\text{C}$  NMR (126 MHz,  $\text{CDCl}_3$ )  $\delta$  176.0 ( $\text{C}_q$ ), 173.3 (CH), 155.9 ( $\text{C}_q$ ), 139.7 ( $\text{C}_q$ ), 128.4 (CH), 126.0 (CH), 121.7 (CH), 120.8 (CH), 73.8 ( $\text{C}_q$ ), 61.0 ( $\text{CH}_2$ ), 54.7 (CH), 47.4 ( $\text{CH}_2$ ), 33.6 ( $\text{CH}_2$ ), 31.1 ( $\text{CH}_2$ ), 24.9 (CH), 23.9 ( $\text{CH}_2$ ), 23.4 ( $\text{CH}_3$ ), 21.6 ( $\text{CH}_3$ ); IR (neat):  $\nu_{\text{max}}$  ( $\text{cm}^{-1}$ ) = 2947 (m), 1629 (m), 1541 (m), 1448 (m), 1113 (s), 986 (m), 879 (m), 750 (l). HRMS (ESI):  $m/z$  calculated for  $\text{C}_{20}\text{H}_{28}\text{N}_3$   $[\text{M}+\text{H}]^+$  310.2278, found: 310.2265.

#### 4-(tert-butyl)-5-(4-chlorobenzyl)-9-methoxy-1,2,4,5,5a,6-hexahydropyrrolo[3',2':3,4]pyrrolo[2,3-b]indole (8ba)

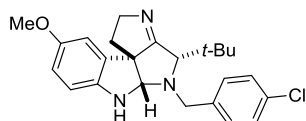

Prepared from isocyanide **1b** (200 mg, 1.0 mmol), 4-chlorobenzylamine (134  $\mu\text{L}$ , 1.1 mmol) and pivaldehyde (119  $\mu\text{L}$ , 1.1 mmol) according to general procedure B within 16 h. Purification: column chromatography on silicagel (cyclohexane/EtOAc 4:1,  $R_f$  = 0.26 in cyclohexane/EtOAc 4:1). Isolated as a yellow oil (385 mg, 0.94 mmol, 94%).

$^1\text{H}$  NMR (500 MHz,  $\text{CDCl}_3$ )  $\delta$  7.37 (q,  $J$  = 8.3 Hz, 4H), 6.64 (d,  $J$  = 8.1 Hz, 1H), 6.60 (s, 1H), 6.42 (d,  $J$  = 8.4 Hz, 1H), 4.44 – 4.35 (m, 1H), 4.32 (dd,  $J$  = 14.9, 8.4 Hz, 1H), 4.20 (s, 1H), 4.16 (d,  $J$  = 13.9 Hz, 1H), 3.86 (d,  $J$  = 14.8 Hz, 1H), 3.72 (s, 3H), 3.25 (s, 1H), 2.32 (q,  $J$  = 11.2 Hz, 1H), 2.17 (dd,  $J$  = 12.3, 5.4 Hz, 1H), 0.81 (s, 9H);  $^{13}\text{C}$  NMR (126 MHz,  $\text{CDCl}_3$ )  $\delta$  187.2 ( $\text{C}_q$ ), 153.9 ( $\text{C}_q$ ), 143.0 ( $\text{C}_q$ ), 138.5 ( $\text{C}_q$ ), 133.5 ( $\text{C}_q$ ), 132.4 ( $\text{C}_q$ ), 130.1 (CH), 129.1 (CH), 113.6 (CH), 110.7 (CH), 110.7 (CH), 88.7 (CH), 73.8 (CH), 69.7 ( $\text{C}_q$ ), 66.2 ( $\text{CH}_2$ ), 61.6 ( $\text{CH}_2$ ), 56.2 ( $\text{CH}_3$ ), 41.0 ( $\text{CH}_2$ ), 35.9 ( $\text{C}_q$ ), 27.4 ( $\text{CH}_3$ ); IR (neat):  $\nu_{\text{max}}$   $\text{cm}^{-1}$  = 2951 (m), 1647 (m), 1488 (l), 1464 (s), 1448 (m), 1435 (s), 1288 (m), 1205 (m), 1090 (m), 1007 (s), 937 (m), 851 (l), 636 (s); HRMS (ESI):  $m/z$  calculated for  $\text{C}_{24}\text{H}_{29}\text{ClN}_3\text{O}$   $[\text{M}+\text{H}]^+$  410.1994, found: 410.1983.

#### 2'-(benzo[d][1,3]dioxol-5-yl(4-methylpiperidin-1-yl)methyl)-5-chloro-4',5'-dihydrospiro[indole-3,3'-pyrrole] (12ca)

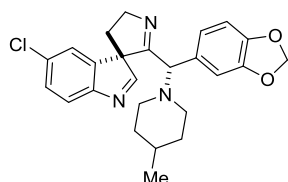

Prepared from isocyanide **1c** (205 mg, 1.0 mmol), 4-methylpiperidine (130  $\mu\text{L}$ , 1.1 mmol) and piperonal (165 mg, 1.1 mmol) according to general procedure B within 16 h. Purification: column chromatography on silicagel (4% MeOH in  $\text{CH}_2\text{Cl}_2$ ,  $R_f$  = 0.30 in cyclohexane/EtOAc 4:1). Isolated as a yellow oil (192 mg, 0.44 mmol, 44%).

$^1\text{H}$  NMR (500 MHz,  $\text{CDCl}_3$ )  $\delta$  7.57 (s, 1H), 7.51 (d,  $J$  = 10.1 Hz, 1H), 7.28 (d,  $J$  = 8.1 Hz, 1H), 6.91 (s, 1H), 6.59 (s, 1H), 6.54 (d,  $J$  = 7.9 Hz, 1H), 6.45 (d,  $J$  = 7.8 Hz, 1H), 5.87 (d,  $J$  = 13.1 Hz, 2H), 4.31 – 4.15 (m, 2H), 3.35 (s, 1H), 2.93 (d,  $J$  = 10.9 Hz, 1H), 2.58 (d,  $J$  = 11.2 Hz, 1H), 2.50 – 2.41 (m, 1H), 2.00 – 1.94 (m, 1H), 1.72 (t,  $J$  = 11.0 Hz, 1H), 1.59 – 1.51 (m, 2H), 1.40 (d,  $J$  = 12.1 Hz, 1H), 1.34 – 1.21 (m, 2H), 1.08 (q,  $J$  = 11.6 Hz, 1H), 0.84 (d,  $J$  = 3.9 Hz, 3H);  $^{13}\text{C}$  NMR (126 MHz,  $\text{CDCl}_3$ )  $\delta$  174.7 ( $\text{C}_q$ ), 173.1 (CH), 153.4 ( $\text{C}_q$ ), 147.5 ( $\text{C}_q$ ), 147.3 ( $\text{C}_q$ ), 141.2 ( $\text{C}_q$ ), 132.0 ( $\text{C}_q$ ), 130.0 (CH), 128.3 (CH), 123.1 (CH), 122.1 (CH), 122.0 (CH), 108.9 (CH), 107.7 (CH), 101.0 ( $\text{C}_q$ ), 73.8 ( $\text{C}_q$ ), 71.5 (CH), 60.2 ( $\text{CH}_2$ ), 53.0 ( $\text{CH}_2$ ), 51.6 ( $\text{CH}_2$ ), 33.9 ( $\text{CH}_2$ ), 33.8 ( $\text{CH}_2$ ), 32.3 ( $\text{CH}_2$ ), 30.7 (CH), 21.8 ( $\text{CH}_3$ ); IR (neat):  $\nu_{\text{max}}$   $\text{cm}^{-1}$  = 2962 (m), 1655 (m), 1605 (m), 1462 (s), 1263 (s), 1163 (m), 1045 (s), 906 (m), 733 (l); HRMS (ESI $^+$ ) calculated  $\text{C}_{25}\text{H}_{27}\text{ClN}_3\text{O}_2$   $[\text{M}+\text{H}]^+$  436.1786, found 436.1804.

#### 4-cyclopentyl-5-(3-methoxyphenethyl)-6-methyl-1,2,4,5,5a,6-hexahydropyrrolo[3',2':3,4]pyrrolo[2,3-b]indole (8db)

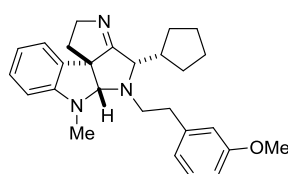

Prepared from isocyanide **1d** (184 mg, 1.0 mmol), 3-methoxyphenethylamine (160  $\mu\text{L}$ , 1.1 mmol) and cyclopentanecarboxaldehyde (117  $\mu\text{L}$ , 1.1 mmol) according to general procedure B within 16 h. Purification: column

chromatography on silicagel (cyclohexane/EtOAc 4:1,  $R_f = 0.57$  in cyclohexane/EtOAc 4:1). Isolated as a yellow oil (299 mg, 0.72 mmol, 72%).

$^1\text{H}$  NMR (500 MHz,  $\text{CDCl}_3$ )  $\delta$  7.21 (t,  $J = 7.8$  Hz, 1H), 7.11 (t,  $J = 7.6$  Hz, 1H), 6.95 (d,  $J = 7.2$  Hz, 1H), 6.79 (d,  $J = 7.4$  Hz, 1H), 6.75 (d,  $J = 8.7$  Hz, 2H), 6.57 (t,  $J = 7.4$  Hz, 1H), 6.34 (d,  $J = 7.8$  Hz, 1H), 4.39 – 4.32 (m, 1H), 4.28 (dd,  $J = 14.7, 8.4$  Hz, 1H), 3.80 (s, 3H), 3.14 (d,  $J = 8.2$  Hz, 1H), 3.07 (t,  $J = 8.2$  Hz, 2H), 2.87 (s, 3H), 2.80 – 2.71 (m, 2H), 2.32 (dd,  $J = 12.6, 5.7$  Hz, 1H), 2.25 – 2.16 (m, 1H), 1.54 – 1.40 (m, 3H), 1.37 – 1.17 (m, 6H).  $^{13}\text{C}$  NMR (126 MHz,  $\text{CDCl}_3$ )  $\delta$  186.5 ( $\text{C}_q$ ), 159.7 ( $\text{C}_q$ ), 150.3 ( $\text{C}_q$ ), 141.4 ( $\text{C}_q$ ), 131.7 ( $\text{C}_q$ ), 129.5 (CH), 128.9 (CH), 122.1 (CH), 121.2 (CH), 117.3 (CH), 114.7 (CH), 111.4 (CH), 106.0 (CH), 90.3 (CH), 67.90 (CH), 66.7 ( $\text{C}_q$ ), 66.0 ( $\text{CH}_2$ ), 58.5 ( $\text{CH}_2$ ), 55.2 ( $\text{CH}_3$ ), 44.5 ( $\text{CH}_3$ ), 40.4 ( $\text{CH}_2$ ), 35.5 ( $\text{CH}_2$ ), 30.9 ( $\text{CH}_2$ ), 30.6 (CH), 28.9 ( $\text{CH}_2$ ), 25.0 ( $\text{CH}_2$ ); IR (neat):  $\nu_{\text{max}}$  ( $\text{cm}^{-1}$ ) = 2954 (m), 2866 (s), 1665 (s), 1601 (m), 1489 (m), 1298 (s), 1258 (m), 1151 (m), 1099 (s), 1043 (s), 953 (s), 738 (m); HRMS (ESI):  $m/z$  calculated for  $\text{C}_{27}\text{H}_{34}\text{N}_3\text{O}$   $[\text{M}+\text{H}]^+$  416.2696, found: 416.2696.

### N-(2-methyl-1-(2-methyl-4',5'-dihydrospiro[indole-3,3'-pyrrol]-2'-yl)propyl)cyclopropanamine (12ea)

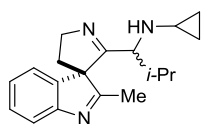

Prepared from isocyanide **1e** (184 mg, 1.0 mmol), cyclopropylamine (76  $\mu\text{L}$ , 1.1 mmol) and isobutyraldehyde (100  $\mu\text{L}$ , 1.1 mmol) according to general procedure B within 16 h. Evaporation of the solvent and excess starting materials afforded the compound as an orange solid. Isolated as an orange oil (292 mg, 0.99 mmol, 99%) as a mixture of diastereoisomers (1:1 based on  $^1\text{H}$  NMR). Separation of the diastereoisomers was not possible, and since no other side products were formed, no further purification was required.

$^1\text{H}$ -NMR (500 MHz,  $\text{CDCl}_3$ )  $\delta$  7.54 (d,  $J = 7.6$  Hz, 2H), 7.40 – 7.29 (m, 2H), 7.19 (s, 2H), 7.15 (d,  $J = 4.4$  Hz, 2H), 4.39 (dt,  $J = 12.2, 6.0$  Hz, 1H), 4.29 (t,  $J = 7.0$  Hz, 2H), 4.18 (dt,  $J = 15.9, 7.9$  Hz, 1H), 2.53 – 2.50 (m, 1H), 2.49 – 2.42 (m, 2H), 2.41 – 2.36 (m, 2H), 2.29 (s, 3H), 2.30 – 2.25 (m, 1H), 2.23 (s, 3H), 2.10 – 2.01 (m, 3H), 1.96 – 1.89 (m, 1H), 1.31 (s, 1H), 1.01 (dd,  $J = 9.6, 3.8$  Hz, 1H), 0.74 – 0.66 (m, 6H), 0.63 (d,  $J = 6.7$  Hz, 3H), 0.56 (d,  $J = 6.9$  Hz, 3H), 0.34 – 0.28 (m, 2H), 0.28 – 0.22 (m, 3H), 0.11 – 0.02 (m, 2H), -0.16 (s, 1H);  $^{13}\text{C}$ -NMR (126 MHz,  $\text{CDCl}_3$ )  $\delta$  181.9 ( $\text{C}_q$ ), 181.2 ( $\text{C}_q$ ), 177.9 ( $\text{C}_q$ ), 177.2 ( $\text{C}_q$ ), 155.8 ( $\text{C}_q$ ), 155.2 ( $\text{C}_q$ ), 141.2 ( $\text{C}_q$ ), 140.9 ( $\text{C}_q$ ), 128.5 (CH), 128.5 (CH), 125.7 (CH), 125.5 (CH), 122.0 (CH), 121.9 (CH), 120.1 (CH), 75.3 ( $\text{C}_q$ ), 62.7 (CH), 62.5 (CH), 60.2 ( $\text{CH}_2$ ), 60.1 ( $\text{CH}_2$ ), 34.3 ( $\text{CH}_2$ ), 33.9 ( $\text{CH}_2$ ), 30.2 (CH), 29.8 (CH), 29.2 (CH), 29.2 (CH), 20.7 ( $\text{CH}_3$ ), 20.1 ( $\text{CH}_3$ ), 17.1 ( $\text{CH}_3$ ), 16.8 ( $\text{CH}_3$ ), 15.6 ( $\text{CH}_3$ ), 15.6 ( $\text{CH}_3$ ), 6.9 ( $\text{CH}_2$ ), 6.7 ( $\text{CH}_2$ ), 6.2 ( $\text{CH}_2$ ); IR ( $\text{cm}^{-1}$ ):  $\nu_{\text{max}}$  = 2957 (s), 1634 (s), 1573 (s), 1456 (s), 1364 (s), 1014 (s), 906 (m), 727 (l); HRMS (ESI):  $m/z$  calculated for  $\text{C}_{19}\text{H}_{26}\text{N}_3$   $[\text{M}+\text{H}]^+$  296.2121, found: 296.2107.

### General procedure C: Subsequent Ugi reaction to form compounds of type 8.

To a solution of **3** (1.0 equiv) in dichloromethane (0.1M) were added carboxylic acid (1.2 equiv) and isocyanide (1.2 equiv). After full depletion of the isocyanide on TLC the reaction was concentrated *in vacuo*. Purification by silica gel chromatography afforded the desired product with an eluent system of cyclohexane/EtOAc.

**3-acetyl-N-(tert-butyl)-4,5-diphenyl-2,3,4,5,5a,6-hexahydropyrrolo[3',2':3,4]pyrrolo[2,3-b]indole-3a(1H)-carboxamide (13a)**

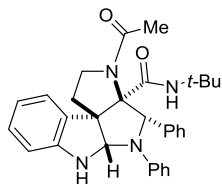

Prepared from interrupted Ugi product **3aa** (86 mg, 0.25 mmol, 1 equiv), acetic acid (15.7  $\mu$ l, 0.275 mmol, 1.1 equiv) and *tert*-butyl isocyanide (31.1  $\mu$ l, 0.275 mmol, 1.1 equiv) according to general procedure B within 24 h. Purification: column chromatography on silicagel (cyclohexane/EtOAc 1:2,  $R_f$  = 0.11 in cyclohexane/EtOAc 1:2). Isolated as a yellow oil (83 mg, 0.17 mmol, 67%).

$^1\text{H}$  NMR (500 MHz,  $\text{CDCl}_3$ )  $\delta$  7.51 – 7.45 (m, 2H), 7.21 – 7.13 (m, 7H), 6.74 – 6.68 (m, 3H), 6.53 (d,  $J$  = 8.2 Hz, 2H), 5.68 (s, 1H), 5.55 (s, 1H), 4.39 (s, 1H), 3.90 (t,  $J$  = 9.5 Hz, 1H), 3.75 – 3.57 (m, 1H), 2.73 (q,  $J$  = 12.5, 10.5 Hz, 1H), 2.30 (dd,  $J$  = 12.7, 6.4 Hz, 1H), 2.12 (s, 3H), 0.87 (s, 9H);  $^{13}\text{C}$  NMR (126 MHz,  $\text{CDCl}_3$ )  $\delta$  170.2 ( $\text{C}_q$ ), 165.7 ( $\text{C}_q$ ), 149.8 ( $\text{C}_q$ ), 144.0 ( $\text{C}_q$ ), 139.5 ( $\text{C}_q$ ), 129.7 (CH), 129.6 (CH), 129.5 (CH), 129.3 (CH), 128.5 (CH), 126.9 (CH), 125.9 ( $\text{C}_q$ ), 119.0 (CH), 117.6 (CH), 112.4 (CH), 109.6 (CH), 82.0 (CH), 81.3 ( $\text{C}_q$ ), 71.9 (CH), 66.8 ( $\text{C}_q$ ), 51.3 ( $\text{C}_q$ ), 46.8 ( $\text{CH}_2$ ), 36.6 ( $\text{CH}_2$ ), 28.0 ( $\text{CH}_3$ ), 23.7 ( $\text{CH}_3$ ); IR (neat):  $\nu_{\text{max}}$  ( $\text{cm}^{-1}$ ) = 2361 (s), 1636 (s), 1504 (s), 1213 (s), 1041 (s), 906 (l), 727 (l); HRMS (ESI):  $m/z$  calculated for  $\text{C}_{31}\text{H}_{35}\text{N}_4\text{O}_2$   $[\text{M}+\text{H}]^+$  495.2755, found: 495.2742.

**3-benzoyl-N-butyl-5-(3-chlorophenyl)-4-(4-chlorophenyl)-2,3,4,5,5a,6-hexahydropyrrolo[3',2':3,4]pyrrolo[2,3-b]indole-3a(1H)-carboxamide (13b)**

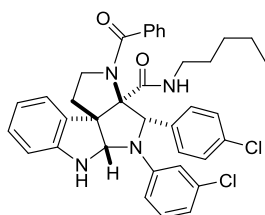

Prepared from interrupted Ugi product **3ac** (59 mg, 0.14 mmol, 1 equiv), benzoic acid (21 mg, 0.17 mmol, 1.2 equiv) and 1-pentyl isocyanide (21.4  $\mu$ l, 0.17 mmol, 1.2 equiv) according to general procedure B within 24 h. Purification: column chromatography on silicagel (cyclohexane/EtOAc 4:1,  $R_f$  = 0.27 in cyclohexane/EtOAc 4:1). Isolated as a yellow oil (40 mg, 0.44 mmol, 44%).

$^1\text{H}$  NMR (500 MHz,  $\text{CDCl}_3$ , rotamers observed in 5:1 ratio)  $\delta$  8.10 (d,  $J$  = 8.0 Hz, 1.2H), 7.63 – 7.51 (m, 4.4H), 7.46 (t,  $J$  = 7.7 Hz, 1.4H), 7.44 – 7.35 (m, 2.6H), 7.25 – 7.14 (m, 3.4H), 7.11 (t,  $J$  = 7.8 Hz, 0.4H), 7.05 (t,  $J$  = 8.2 Hz, 1H), 6.95 (d,  $J$  = 7.6 Hz, 1H), 6.79 – 6.68 (m, 2.6H), 6.62 (s, 1H), 6.52 (s, 0.2H), 6.42 – 6.34 (m, 1.2H), 5.73 (s, 1.2H), 5.67 (s, 1.2H), 4.66 (s, 0.2H), 4.14 (s, 1H), 3.86 – 3.74 (m, 2H), 3.72 – 3.62 (m, 0.2H), 3.58 – 3.50 (m, 0.2H), 3.49 – 3.42 (m, 0.2H), 3.34 – 3.27 (m, 0.2H), 3.13 – 3.04 (m, 1H), 2.97 (dt,  $J$  = 12.8, 5.9 Hz, 0.2H), 2.89 – 2.76 (m, 1.2H), 2.70 (q,  $J$  = 10.7, 10.3 Hz, 1H), 2.22 (dd,  $J$  = 12.8, 5.4 Hz, 1H), 1.11 (h,  $J$  = 7.1 Hz, 2.2H), 0.98 – 0.85 (m, 1H), 0.82 – 0.64 (m, 5.6H);  $^{13}\text{C}$  NMR (126 MHz,  $\text{CDCl}_3$ )  $\delta$  170.9 ( $\text{C}_q$ ), 170.8 ( $\text{C}_q$ ), 170.1 ( $\text{C}_q$ ), 166.3 ( $\text{C}_q$ ), 149.4 ( $\text{C}_q$ ), 147.5 ( $\text{C}_q$ ), 144.9 ( $\text{C}_q$ ), 137.0 ( $\text{C}_q$ ), 136.4 ( $\text{C}_q$ ), 135.4 ( $\text{C}_q$ ), 134.9 ( $\text{C}_q$ ), 133.6 (CH), 130.8 (CH), 130.7 (CH), 130.5 (CH), 130.4 (CH), 130.2 (CH), 130.1 (CH), 129.6 (CH), 129.5 (CH), 128.7 (CH), 128.5 (CH), 128.4 (CH), 127.2 (CH), 125.8 ( $\text{C}_q$ ), 125.7 (CH), 122.4 (CH), 122.3 (CH), 119.8 (CH), 119.6 (CH), 118.9 (CH), 118.6 (CH), 118.1 (CH), 113.7 (CH), 112.4 (CH), 112.0 (CH), 111.5 (CH), 111.2 (CH), 110.1 (CH), 82.0 (CH), 81.5 ( $\text{C}_q$ ), 71.6 (CH), 67.3 ( $\text{C}_q$ ), 62.5 (CH), 48.7 ( $\text{CH}_2$ ), 40.0 ( $\text{CH}_2$ ), 39.7 ( $\text{CH}_2$ ), 37.1 ( $\text{CH}_2$ ), 29.0 ( $\text{CH}_2$ ), 27.8 ( $\text{CH}_2$ ), 27.0 ( $\text{CH}_2$ ), 25.1 ( $\text{CH}_2$ ), 22.3 ( $\text{CH}_2$ ), 14.0 ( $\text{CH}_3$ ); IR (neat):  $\nu_{\text{max}}$  ( $\text{cm}^{-1}$ ) = 3427 (s), 2930 (s), 2357 (s), 2357 (s), 1624 (s), 1593 (l), 1485 (l), 1447 (s), 1406 (m), 1265 (m), 1173 (s), 1092 (m), 1026 (s), 908 (m), 729 (l); HRMS (ESI):  $m/z$  calculated for  $\text{C}_{37}\text{H}_{36}\text{Cl}_2\text{N}_4\text{O}_2$   $[\text{M}+\text{Na}]^+$  661.2108, found: 661.2088.

### One pot interrupted Ugi / Joullié-Ugi towards **8a**.

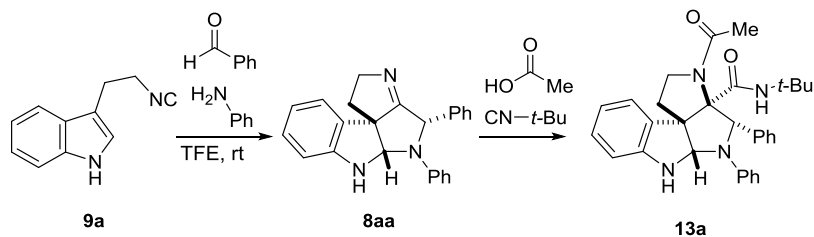

To a solution of isocyanide **1a** (170 mg, 1.0 mmol, 1.0 equiv) in TFE (10.0 mL) was added aniline (100  $\mu\text{l}$ , 1.1 mmol, 1.1 equiv) and benzaldehyde (112  $\mu\text{l}$ , 1.1 mmol, 1.1 equiv). The reaction mixture was stirred at room temperature for 48 h. After full depletion of **1a** (monitored by TLC), acetic acid (69  $\mu\text{l}$ , 1.2 mmol, 1.2 equiv) and *tert*-butyl isocyanide (136  $\mu\text{l}$ , 1.2 mmol, 1.2 equiv) were respectively added. The intermediate interrupted Ugi product was fully converted after 24h. The reaction was concentrated and purified by column chromatography (cyclohexane/EtOAc, 2:1), to afford compound **8a** as a pale yellow oil (207 mg, 0.42 mmol, 42 %).



## X-ray analysis

A single crystal of **8ah** was mounted on a Mitegen kapton loop and placed in the cold stream (104K) of the diffractometer setup described in the experimental section. Data collection and refinement led to the CIF file in the supporting information, in which all further pertinent details are described.

The main finding from the diffraction experiment is that **8ah** crystallizes in the centrosymmetric space group  $P2_1/c$ , as a racemic mixture of two enantiomers, (*S,S,S*) and (*R,R,R*), while NMR allows to conclude that the bulk product is diastereomerically pure. In the packing, the benzyl substituent of one molecule points into the cleft formed by the spiroindole, benzyl and *tert*-butyl substituents of its enantiomer, and *vice versa*. The resulting bimolecular building block is much more regularly shaped and thus easier to pack into a crystal. Intermolecular contacts below the van der Waals radius just barely occur between N12 of the hexahydropyrrole and H3 in the indoline benzene ring of the molecule in the a-direction, and the same N12 and H4 in the same ring of the molecule in the b-direction (both distances 2.72 Å, van der Waals distance 2.75 Å). This is consistent with the packing being largely determined by dispersion forces.

# Copies of Spectra

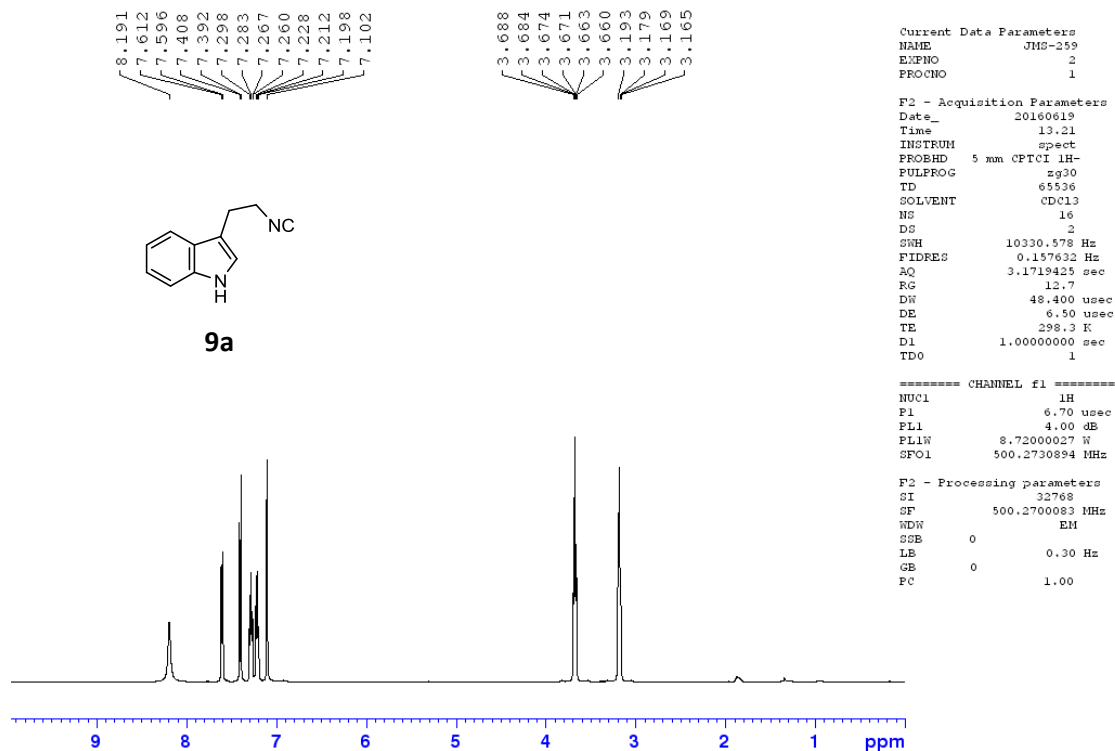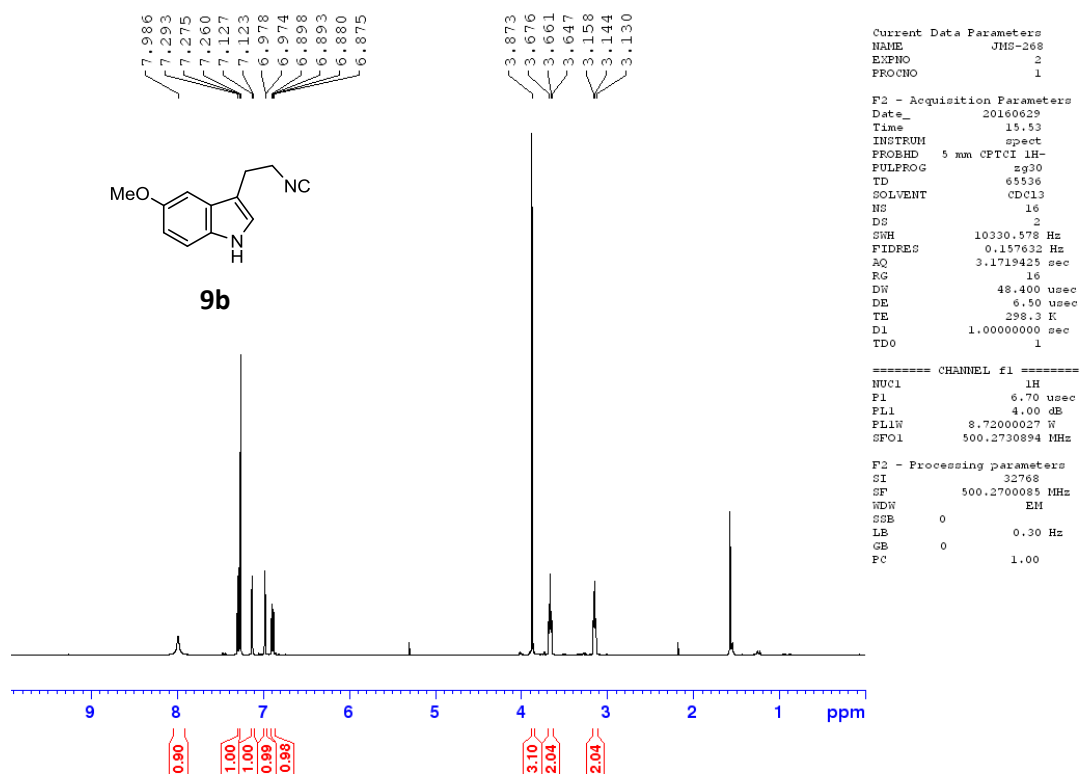

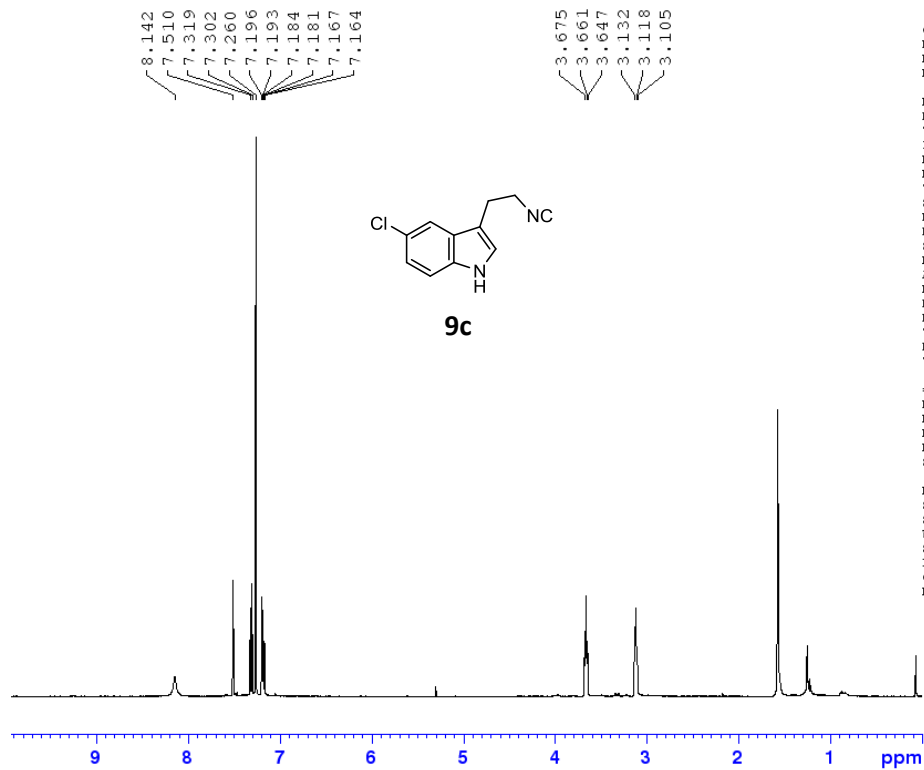

Current Data Parameters  
 NAME BOR-037-1  
 EXPNO 1  
 PROCNO 1

F2 - Acquisition Parameters  
 Date\_ 20160621  
 Time\_ 11.04  
 INSTRUM spect  
 PROBHD 5 mm CPTCI 1H-  
 PULPROG zg30  
 TD 65536  
 SOLVENT CDCl3  
 NS 16  
 DS 2  
 SSB 10330.578 Hz  
 FIDRES 0.157632 Hz  
 AQ 3.1719425 sec  
 RG 18  
 DW 48.400 usec  
 DE 6.50 usec  
 TE 298.3 K  
 D1 1.00000000 sec  
 TDO 1

===== CHANNEL f1 =====  
 NUC1 1H  
 P1 6.70 usec  
 PL1 4.00 dB  
 PLLN 8.72000027 W  
 SFO1 500.2730894 MHz

F2 - Processing parameters  
 SI 32768  
 SF 500.2700084 MHz  
 NDN EM  
 SSB 0  
 LB 0.30 Hz  
 GB 0  
 PC 1.00

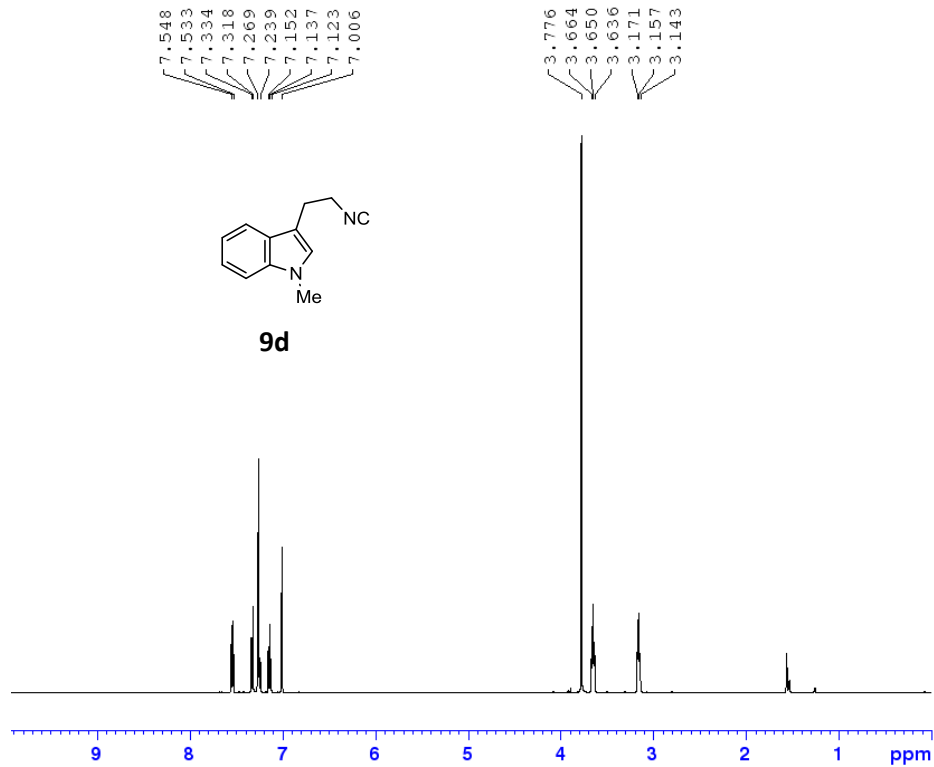

Current Data Parameters  
 NAME JMS-257  
 EXPNO 1  
 PROCNO 1

F2 - Acquisition Parameters  
 Date\_ 20160620  
 Time\_ 17.34  
 INSTRUM spect  
 PROBHD 5 mm CPTCI 1H-  
 PULPROG zg30  
 TD 65536  
 SOLVENT CDCl3  
 NS 16  
 DS 2  
 SSB 10330.578 Hz  
 FIDRES 0.157632 Hz  
 AQ 3.1719425 sec  
 RG 18  
 DW 48.400 usec  
 DE 6.50 usec  
 TE 298.3 K  
 D1 1.00000000 sec  
 TDO 1

===== CHANNEL f1 =====  
 NUC1 1H  
 P1 6.70 usec  
 PL1 4.00 dB  
 PLLN 8.72000027 W  
 SFO1 500.2730894 MHz

F2 - Processing parameters  
 SI 32768  
 SF 500.2700085 MHz  
 NDN EM  
 SSB 0  
 LB 0.30 Hz  
 GB 0  
 PC 1.00

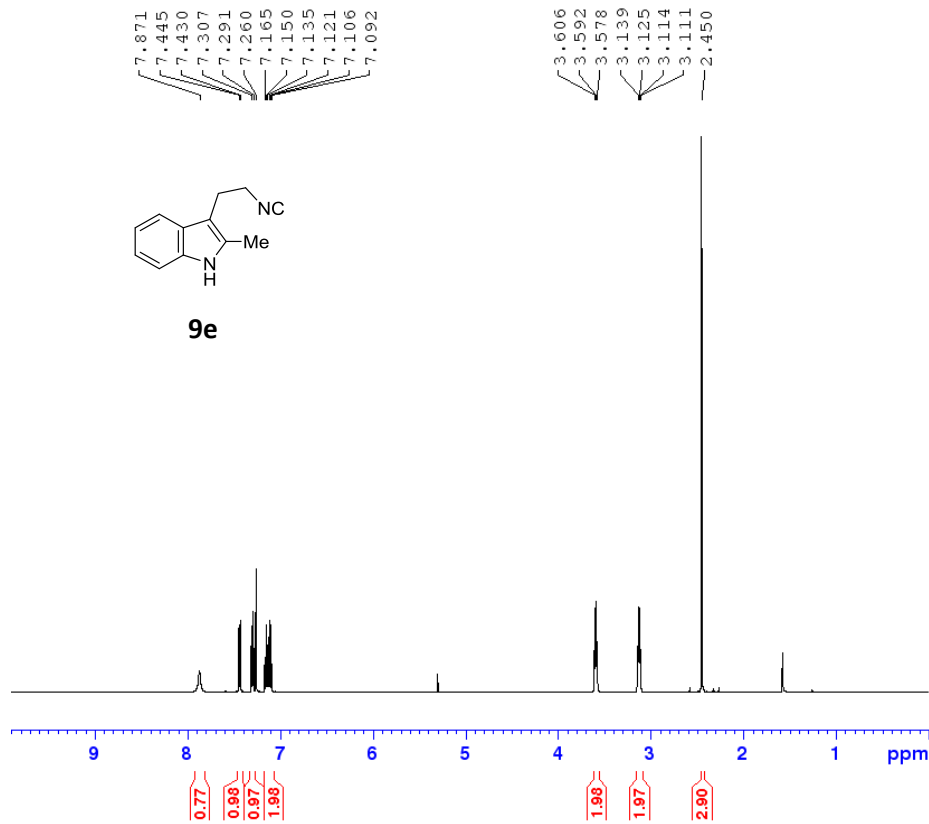

Current Data Parameters  
 NAME JMS-258  
 EXPNO 1  
 PROCNO 1

F2 - Acquisition Parameters  
 Date\_ 20160620  
 Time 17.40  
 INSTRUM spect  
 PROBHD 5 mm CPTCI 1H-  
 PULPROG zg30  
 TD 65536  
 SOLVENT CDCl3  
 NS 16  
 DS 2  
 SWH 10330.578 Hz  
 FIDRES 0.157632 Hz  
 AQ 3.1719425 sec  
 RG 16  
 DW 48.400 usec  
 DE 6.50 usec  
 TE 298.3 K  
 D1 1.00000000 sec  
 TDO 1

===== CHANNEL f1 =====  
 NUC1 1H  
 P1 6.70 usec  
 FL1 4.00 dB  
 PLLN 8.72000027 W  
 SFO1 500.2730894 MHz

F2 - Processing parameters  
 SI 32768  
 SF 500.2700085 MHz  
 WDW EM  
 SSB 0  
 LB 0.30 Hz  
 GB 0  
 FC 1.00

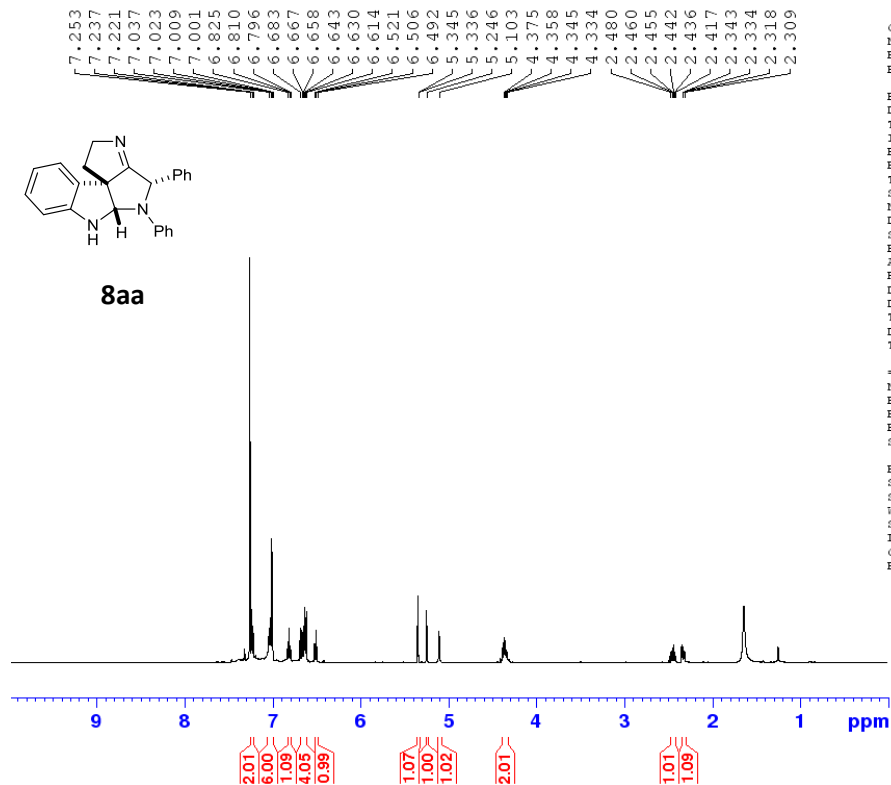

Current Data Parameters  
NAME BOR-024-2  
EXPNO 1  
PROCNO 1

F2 - Acquisition Parameters  
Date\_ 20160716  
Time 17.25  
INSTRUM spect  
PROBHD 5 mm CPTCI 1H-  
PULPROG zg30  
TD 65536  
SOLVENT CDCl3  
NS 128  
DS 0  
SWH 10330.578 Hz  
FIDRES 0.157632 Hz  
AQ 3.1719425 sec  
RG 18  
DW 48.400 usec  
DE 6.50 usec  
TE 286.9 K  
D1 2.00000000 sec  
TDO 1

===== CHANNEL f1 =====  
NUC1 1H  
P1 6.70 usec  
PL1 4.00 dB  
PL1W 8.72000027 W  
SFO1 500.2730894 MHz

F2 - Processing parameters  
SI 32768  
SF 500.2700088 MHz  
WDW EM  
SSB 0  
LB 0.30 Hz  
GB 0  
PC 1.00

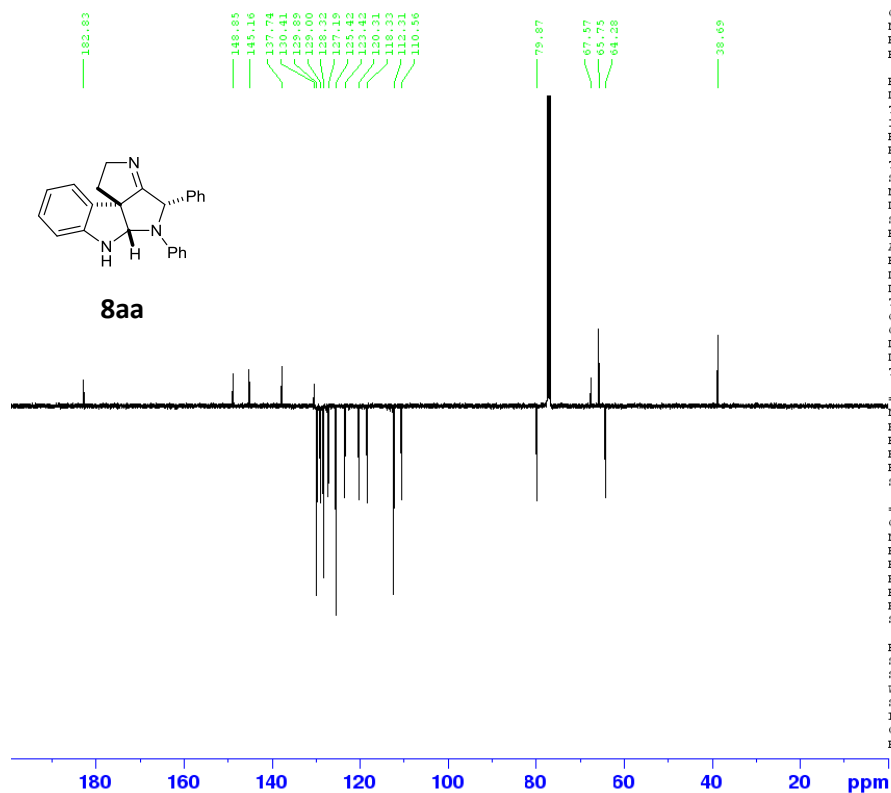

Current Data Parameters  
NAME BOR-024-2  
EXPNO 2  
PROCNO 1

F2 - Acquisition Parameters  
Date\_ 20160716  
Time 19.11  
INSTRUM spect  
PROBHD 5 mm CPTCI 1H-  
PULPROG jmod  
TD 65536  
SOLVENT CDCl3  
NS 2000  
DS 4  
SWH 29761.904 Hz  
FIDRES 0.454131 Hz  
AQ 1.1010048 sec  
RG 2050  
DW 16.800 usec  
DE 6.50 usec  
TE 287.0 K  
CNET2 145.0000000  
CNET11 1.00000000  
D1 2.00000000 sec  
D20 0.00689655 sec  
TDO 1

===== CHANNEL f1 =====  
NUC1 13C  
P1 11.20 usec  
P2 22.40 usec  
PL1 -2.00 dB  
PL1W 88.77790070 W  
SFO1 125.8055709 MHz

===== CHANNEL f2 =====  
CPDPRG[2] waltz16  
NUC2 1H  
PCPD2 80.00 usec  
PL2 4.00 dB  
PL12 25.28 dB  
PL2W 8.72000027 W  
PL12W 0.06494062 W  
SFO2 500.2720011 MHz

F2 - Processing parameters  
SI 32768  
SF 125.7929809 MHz  
WDW EM  
SSB 0  
LB 1.00 Hz  
GB 0  
PC 1.40

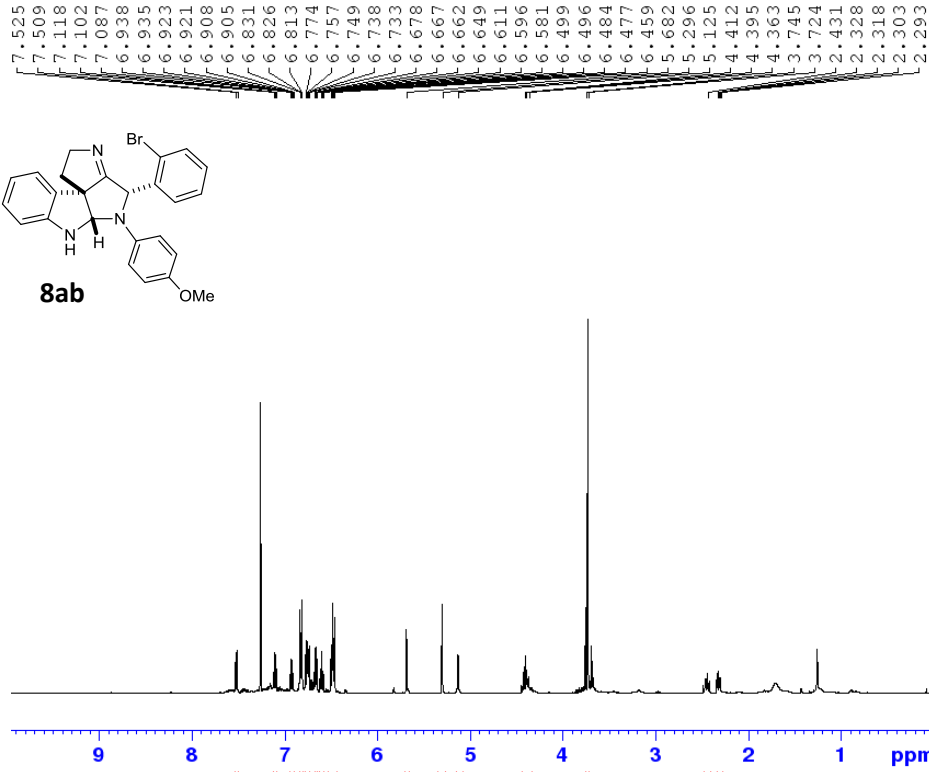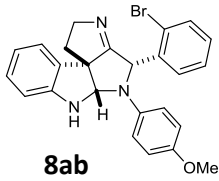

Current Data Parameters  
NAME BOR-024-3  
EXFNO 8  
PROCNO 1

F2 - Acquisition Parameters  
Date\_ 20160715  
Time 17.56  
INSTRUM spect  
PROBHD 5 mm CPTCI LH-  
PULPROG zg30  
TD 65536  
SOLVENT cdcl3  
NS 128  
DS 0  
SWH 10330.578 Hz  
FIDRES 0.157632 Hz  
AQ 3.1719425 sec  
RG 16  
DW 48.400 usec  
DE 6.50 usec  
TE 287.2 K  
D1 2.00000000 sec  
TDO 1

===== CHANNEL f1 =====  
NUC1 1H  
P1 6.70 usec  
PL1 4.00 dB  
PL1W 8.72000027 W  
SF01 500.2730894 MHz

F2 - Processing parameters  
SI 32768  
SF 500.2700085 MHz  
WDW EM  
SSB 0  
LB 0.30 Hz  
GB 0  
FC 1.00

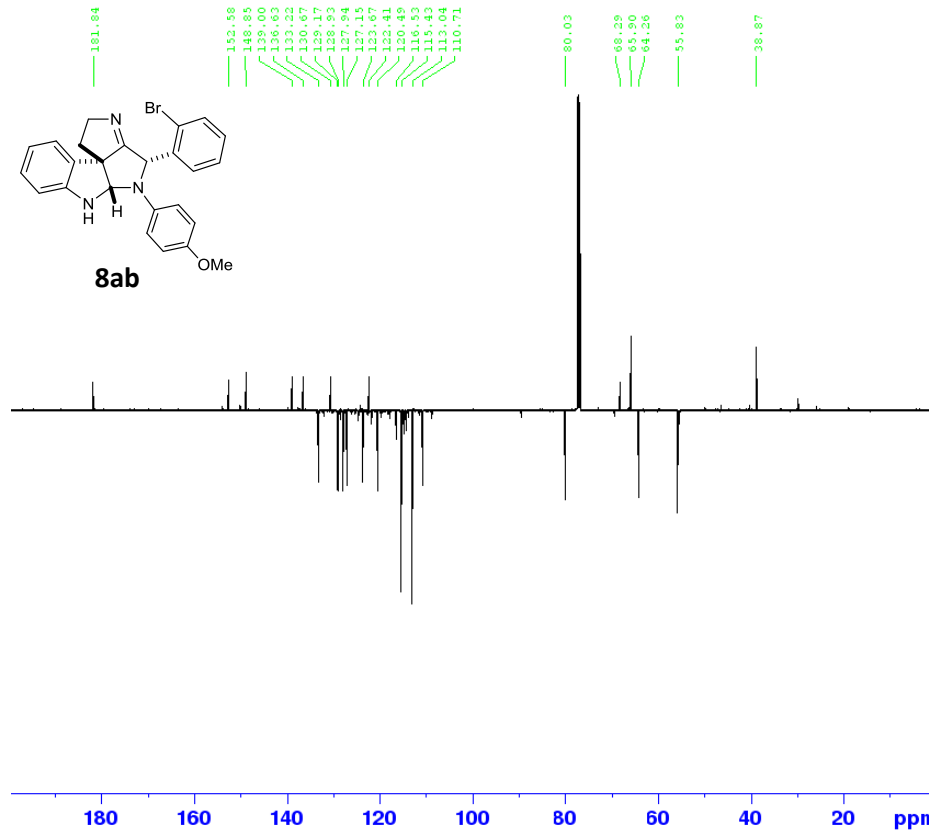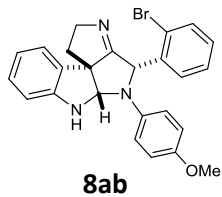

Current Data Parameters  
NAME BOR-024-3  
EXFNO 9  
PROCNO 1

F2 - Acquisition Parameters  
Date\_ 20160716  
Time 21.00  
INSTRUM spect  
PROBHD 5 mm CPTCI LH-  
PULPROG jmod  
TD 65536  
SOLVENT cdcl3  
NS 2000  
DS 4  
SWH 29761.904 Hz  
FIDRES 0.454131 Hz  
AQ 1.1010048 sec  
RG 2050  
DW 16.800 usec  
DE 6.50 usec  
TE 287.0 K

CNST2 145.0000000  
CNST11 1.0000000  
D1 2.00000000 sec  
D20 0.00689655 sec  
TDO 1

===== CHANNEL f1 =====  
NUC1 13C  
P1 11.20 usec  
P2 22.40 usec  
PL1 -2.00 dB  
PL1W 88.77790070 W  
SF01 125.8055709 MHz

===== CHANNEL f2 =====  
CPDPRG2 waltz16  
NUC2 1H  
PCPD2 80.00 usec  
PL2 4.00 dB  
PL12 25.28 dB  
PL2W 8.72000027 W  
PL12W 0.06494062 W  
SF02 500.2720011 MHz

F2 - Processing parameters  
SI 32768  
SF 125.7929828 MHz  
WDW EM  
SSB 0  
LB 1.00 Hz  
GB 0  
FC 1.40

7.088  
7.068  
7.052  
7.038  
6.990  
6.973  
6.927  
6.910  
6.786  
6.770  
6.769  
6.703  
6.687  
6.661  
6.646  
6.629  
6.569  
6.554  
6.539  
6.403  
6.387  
5.311  
5.180  
5.140  
4.407  
4.390  
4.377  
4.361  
4.346  
4.335  
4.326  
4.316  
4.305  
2.468  
2.448  
2.443  
2.423  
2.405  
2.341  
2.331  
2.316  
2.306

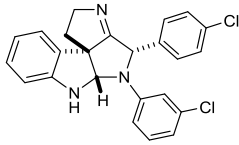

8ac

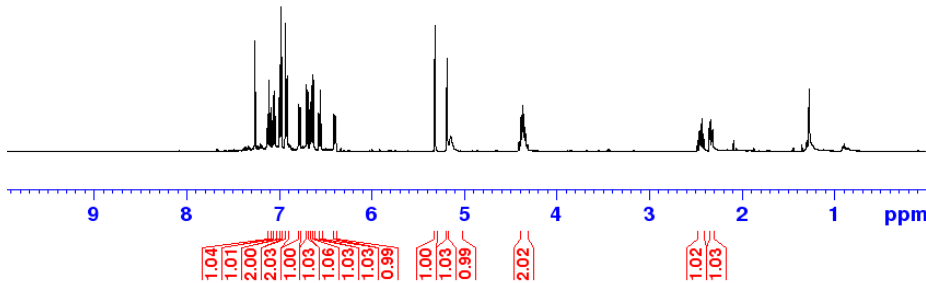

Current Data Parameters  
NAME BOR-048-1  
EXPNO 3  
PROCNO 1

F2 - Acquisition Parameters  
Date\_ 20160722  
Time 7.58  
INSTRUM spect  
PROBHD 5 mm CPTCI 1H-  
PULPROG zg30  
TD 65536  
SOLVENT cdcl3  
NS 16  
DS 2  
SWH 10330.578 Hz  
FIDRES 0.157632 Hz  
AQ 3.1719425 sec  
RG 14.2  
DW 48.400 usec  
DE 6.50 usec  
TE 298.3 K  
D1 1.00000000 sec  
TDO 1

===== CHANNEL f1 =====  
NUC1 1H  
P1 6.70 usec  
PL1 4.00 dB  
PL1W 8.72000027 W  
SFO1 500.2730894 MHz

F2 - Processing parameters  
SI 32768  
SF 500.2700085 MHz  
WDW EM  
SSB 0  
LB 0.30 Hz  
GB 0  
PC 1.00

182.04  
148.45  
146.18  
135.80  
135.59  
130.87  
130.08  
129.22  
128.56  
126.79  
123.34  
119.66  
112.12  
110.90  
110.68  
79.94  
67.70  
63.89  
63.89  
38.71

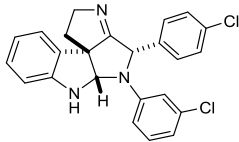

8ac

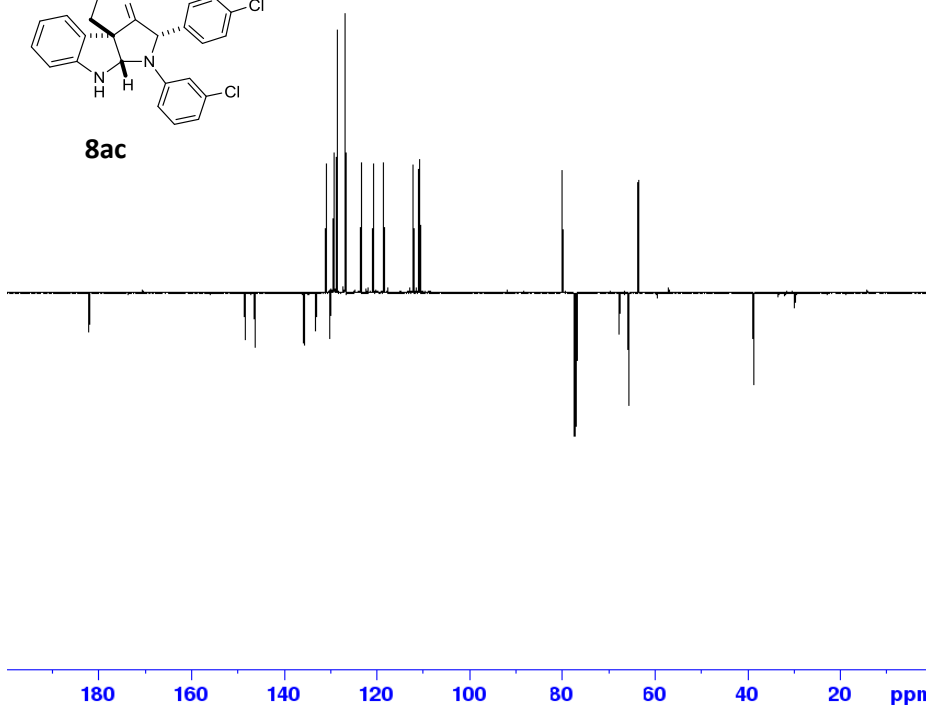

Current Data Parameters  
NAME BOR-048-1  
EXPNO 1  
PROCNO 1

F2 - Acquisition Parameters  
Date\_ 20160720  
Time 8.55  
INSTRUM spect  
PROBHD 5 mm CPTCI 1H-  
PULPROG jmod  
TD 65536  
SOLVENT cdcl3  
NS 500  
DS 4  
SWH 29761.904 Hz  
FIDRES 0.454131 Hz  
AQ 1.1010048 sec  
RG 2050  
DW 16.800 usec  
DE 6.50 usec  
TE 298.2 K  
CNST2 145.0000000  
CNST11 1.0000000  
D1 2.00000000 sec  
D20 0.00689655 sec  
TDO 1

===== CHANNEL f1 =====  
NUC1 13C  
P1 11.20 usec  
F2 22.40 usec  
PL1 -2.00 dB  
PL1W 88.77790070 W  
SFO1 125.8055709 MHz

===== CHANNEL f2 =====  
CFDPRG[2] waltz16  
NUC2 1H  
PCPD2 80.00 usec  
PL2 4.00 dB  
PL12 25.28 dB  
PL2W 8.72000027 W  
FL12W 0.06494062 W  
SFO2 500.2720011 MHz

F2 - Processing parameters  
SI 32768  
SF 125.7929836 MHz  
WDW EM  
SSB 0  
LB 1.00 Hz  
GB 0  
PC 1.40

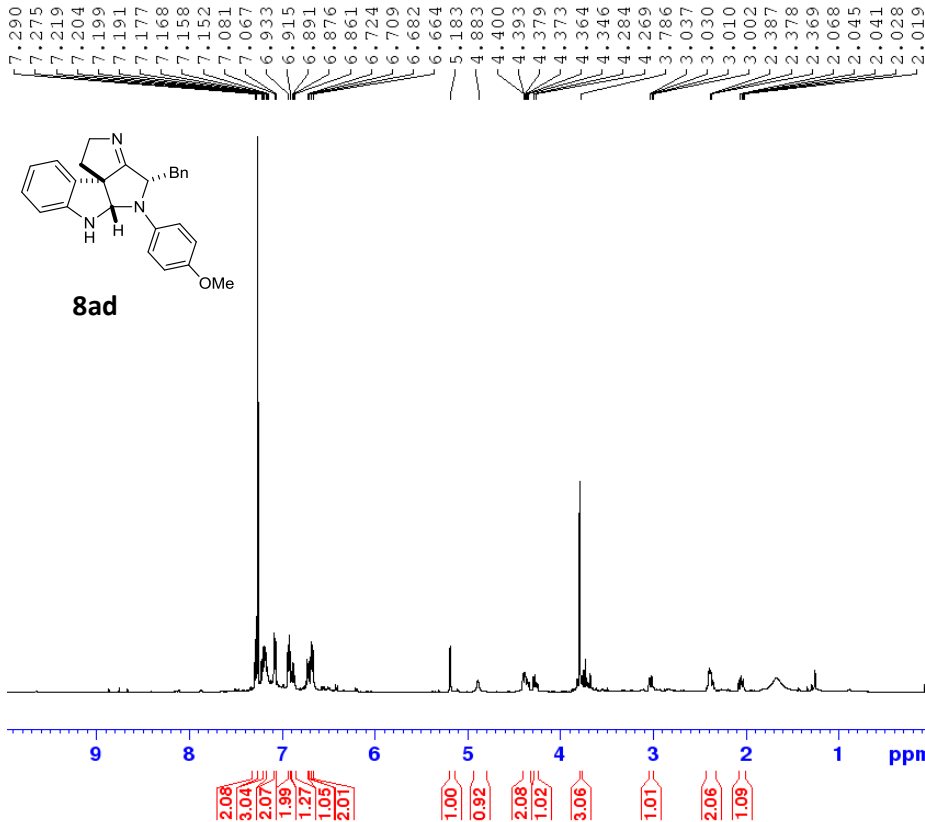

Current Data Parameters  
NAME JMS-265-c  
EXPNO 1  
PROCNO 1

F2 - Acquisition Parameters  
Date\_ 20160716  
Time 15.24  
INSTRUM spect  
PROBHD 5 mm CPTCI 1H-  
PULPROG zg30  
TD 65536  
SOLVENT cdcl3  
NS 128  
DS 0  
SWH 10330.578 Hz  
FIDRES 0.157632 Hz  
AQ 3.1719425 sec  
RG 18  
DW 48.400 usec  
DE 6.50 usec  
TE 287.0 K  
D1 2.00000000 sec  
TDO 1

===== CHANNEL f1 =====  
NUC1 1H  
P1 6.70 usec  
PL1 4.00 dB  
PL1W 8.72000027 W  
SFO1 500.2730894 MHz

F2 - Processing parameters  
SI 32768  
SF 500.2700085 MHz  
WDW EM  
SSB 0  
LB 0.30 Hz  
GB 0  
PC 1.00

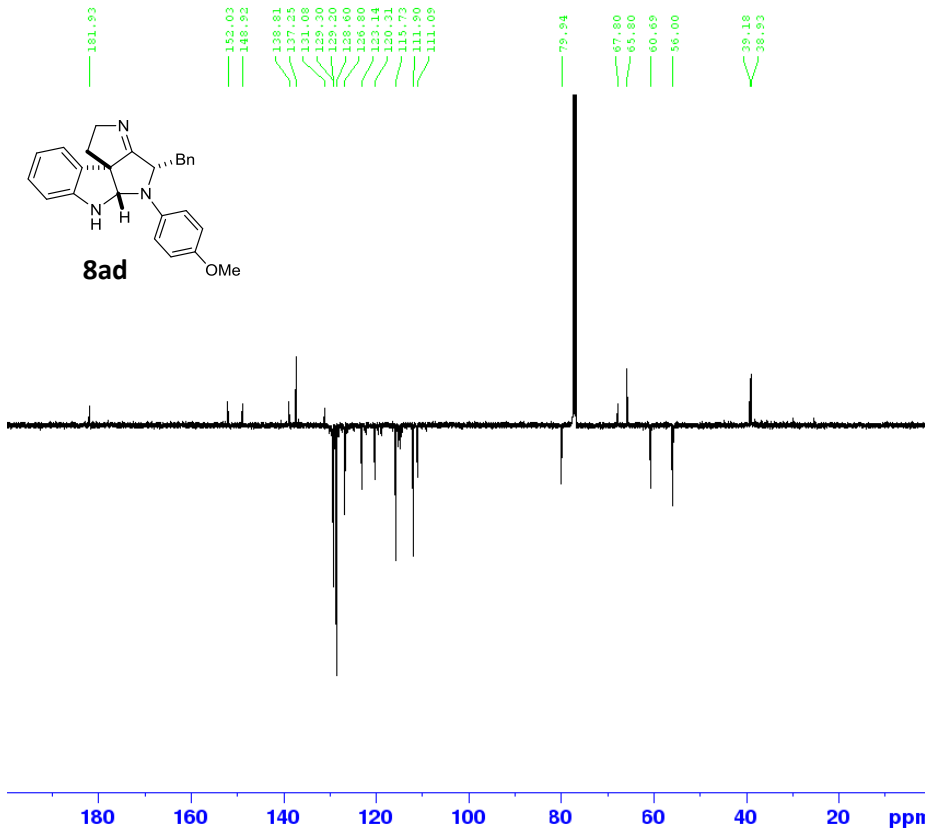

Current Data Parameters  
NAME JMS-265-c  
EXPNO 2  
PROCNO 1

F2 - Acquisition Parameters  
Date\_ 20160716  
Time 17.10  
INSTRUM spect  
PROBHD 5 mm CPTCI 1H-  
PULPROG jmod  
TD 65536  
SOLVENT cdcl3  
NS 2000  
DS 4  
SWH 29761.904 Hz  
FIDRES 0.454131 Hz  
AQ 1.1010048 sec  
RG 2050  
DW 16.800 usec  
DE 6.50 usec  
TE 286.9 K  
CNST2 145.0000000  
CNST11 1.0000000  
D1 2.00000000 sec  
D20 0.00689655 sec  
TDO 1

===== CHANNEL f1 =====  
NUC1 13C  
P1 11.20 usec  
P2 22.40 usec  
PL1 -2.00 dB  
PL1W 88.77790070 W  
SFO1 125.8055709 MHz

===== CHANNEL f2 =====  
CPDPRG[2] waltz16  
NUC2 1H  
PCPD2 80.00 usec  
PL2 4.00 dB  
PL12 25.28 dB  
PL2W 8.72000027 W  
PL12W 0.06494062 W  
SFO2 500.2720011 MHz

F2 - Processing parameters  
SI 32768  
SF 125.7929813 MHz  
WDW EM  
SSB 0  
LB 1.00 Hz  
GB 0  
PC 1.40



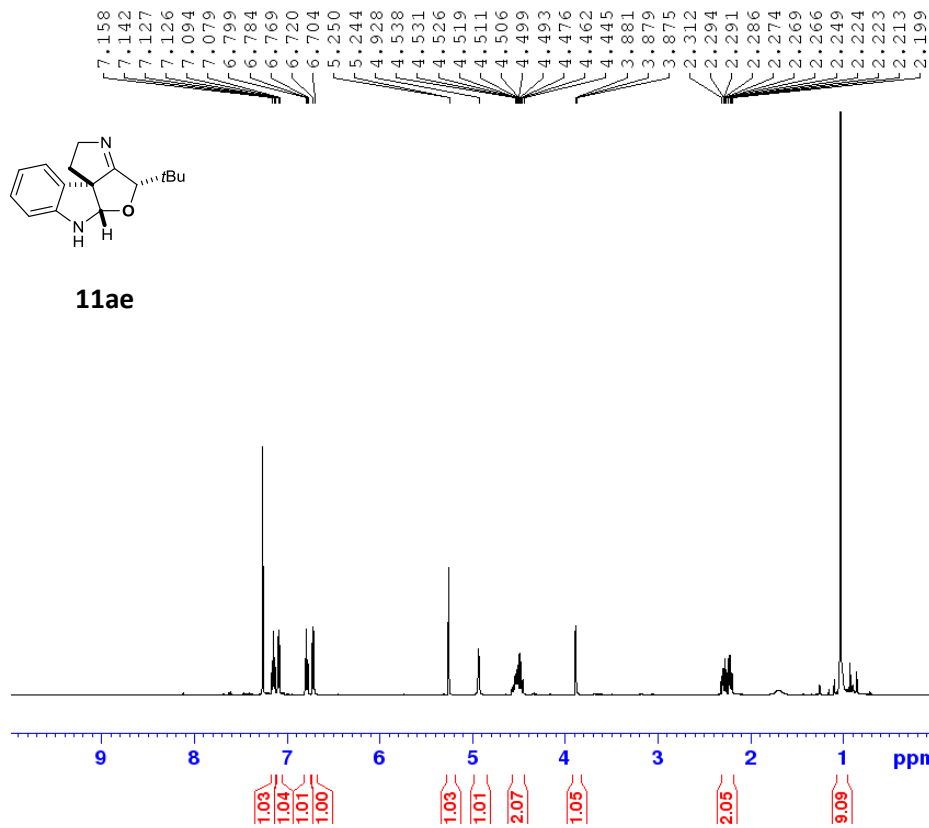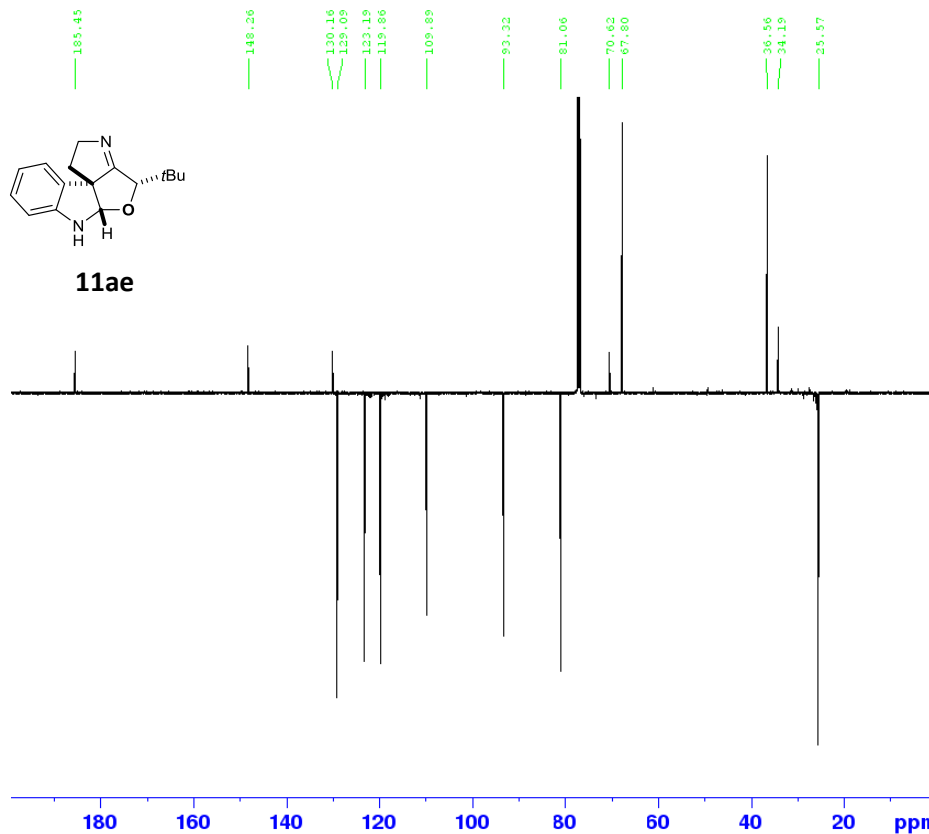

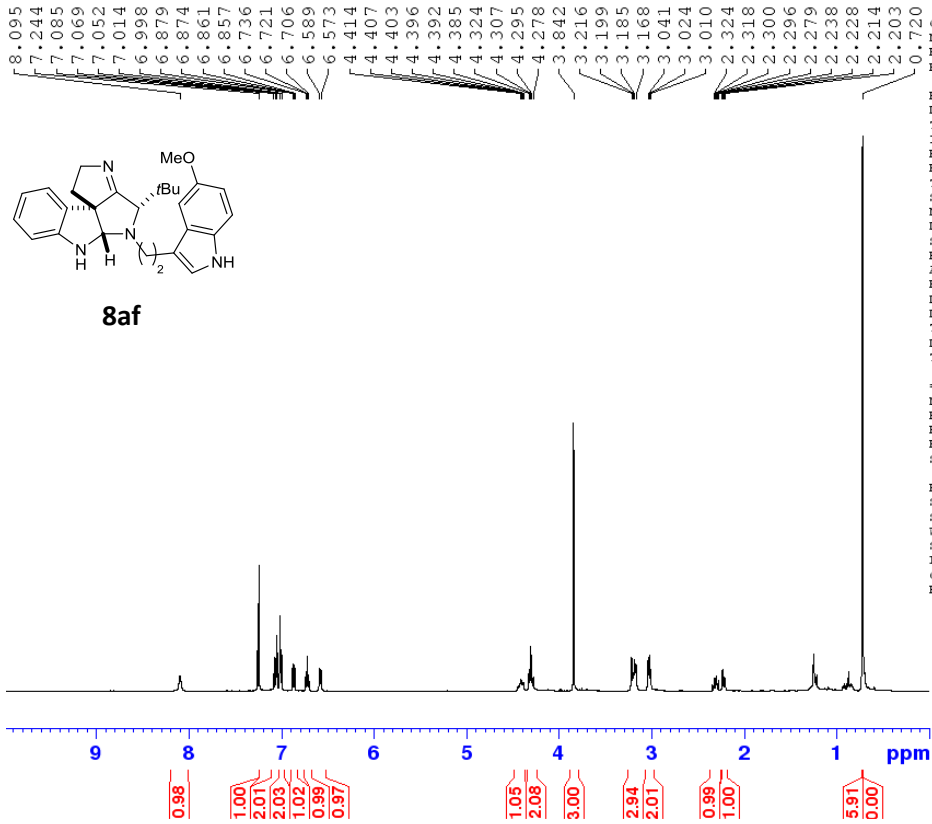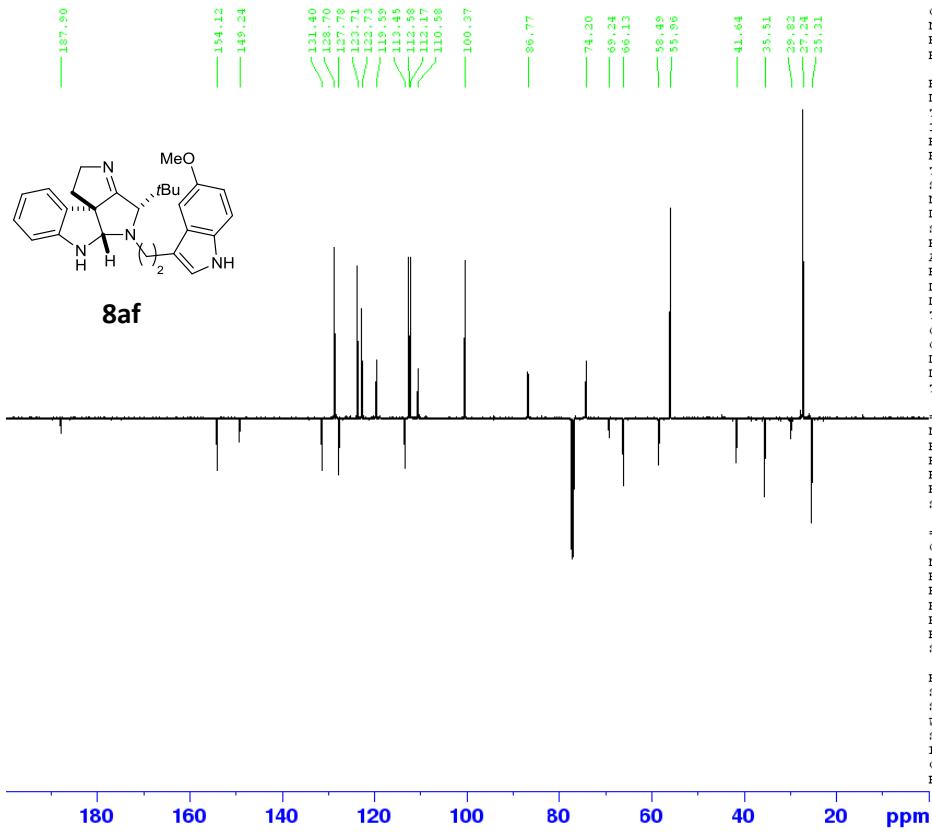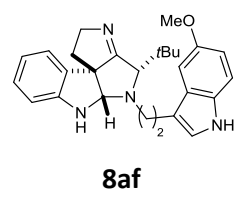

Current Data Parameters  
 NAME BOR-035-1  
 EXPNO 3  
 PROCNO 1

F2 - Acquisition Parameters  
 Date\_ 20160626  
 Time 17.29  
 INSTRUM spect  
 PROBHD 5 mm CPTCI 1H-  
 PULPROG zg30  
 TD 65536  
 SOLVENT CDCl3  
 NS 16  
 DS 2  
 SWH 10330.578 Hz  
 FIDRES 0.157632 Hz  
 AQ 3.1719425 sec  
 RG 14.2  
 DW 48.400 usec  
 DE 6.50 usec  
 TE 298.3 K  
 D1 1.00000000 sec  
 TDO 1

===== CHANNEL f1 =====  
 NUC1 1H  
 P1 6.70 usec  
 PL1 4.00 dB  
 PLLW 8.72000027 W  
 SFO1 500.2730894 MHz

F2 - Processing parameters  
 SI 32768  
 SF 500.2700161 MHz  
 WDW EM  
 SSB 0  
 LB 0.30 Hz  
 GB 0  
 PC 1.00

Current Data Parameters  
 NAME BOR-035-1  
 EXPNO 4  
 PROCNO 1

F2 - Acquisition Parameters  
 Date\_ 20160626  
 Time 17.56  
 INSTRUM spect  
 PROBHD 5 mm CPTCI 1H-  
 PULPROG jmod  
 TD 65536  
 SOLVENT CDCl3  
 NS 512  
 DS 4  
 SWH 29761.904 Hz  
 FIDRES 0.454131 Hz  
 AQ 1.1010048 sec  
 RG 2050  
 DW 16.800 usec  
 DE 6.50 usec  
 TE 298.2 K  
 CNST2 145.0000000  
 CNST11 1.0000000  
 D1 2.00000000 sec  
 D20 0.00689655 sec  
 TDO 1

===== CHANNEL f1 =====  
 NUC1 13C  
 P1 11.20 usec  
 P2 22.40 usec  
 PL1 -2.00 dB  
 PLLW 88.77790070 W  
 SFO1 125.8055709 MHz

===== CHANNEL f2 =====  
 CPDPRG[2] waltz16  
 NUC2 1H  
 P2CPD2 80.00 usec  
 PL2 4.00 dB  
 PLL2 35.28 dB  
 PLLW 8.72000027 W  
 PLL2W 0.06494062 W  
 SFO2 500.2720011 MHz

F2 - Processing parameters  
 SI 32768  
 SF 125.7929809 MHz  
 WDW EM  
 SSB 0  
 LB 1.00 Hz  
 GB 0  
 PC 1.40

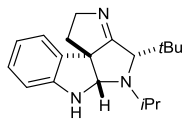

8ag

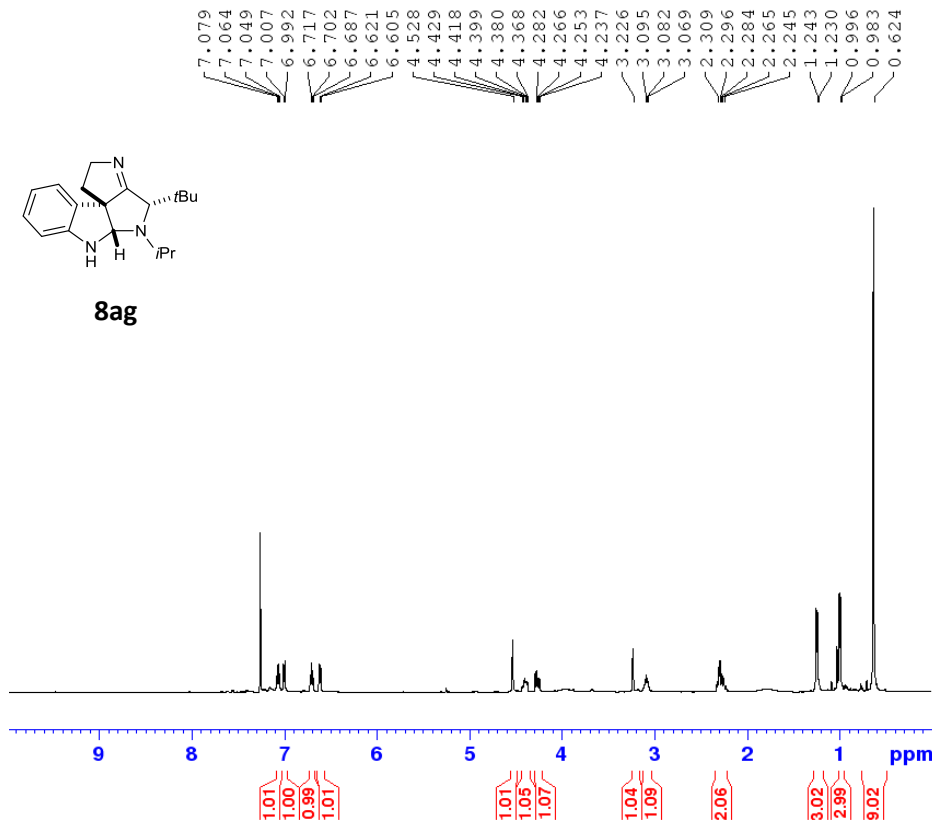

Current Data Parameters  
 NAME BOR-025-1  
 EXPNO 3  
 PROCNO 1

F2 - Acquisition Parameters  
 Date\_ 20160716  
 Time 11.22  
 INSTRUM spect  
 PROBHD 5 mm CPTCI 1H-  
 PULPROG zg30  
 TD 65536  
 SOLVENT CDCl3  
 NS 128  
 DS 0  
 SWH 10330.578 Hz  
 FIDRES 0.157632 Hz  
 AQ 3.1719425 sec  
 RG 18  
 DW 48.400 usec  
 DE 6.50 usec  
 TE 286.9 K  
 D1 2.00000000 sec  
 TDO 1

===== CHANNEL f1 =====  
 NUC1 1H  
 P1 6.70 usec  
 PL1 4.00 dB  
 PL1W 8.72000027 W  
 SFO1 500.2730894 MHz

F2 - Processing parameters  
 SI 32768  
 SF 500.2700085 MHz  
 WDW EM  
 SSB 0  
 LB 0.30 Hz  
 GB 0  
 PC 1.00

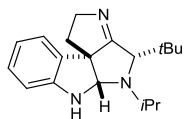

8ag

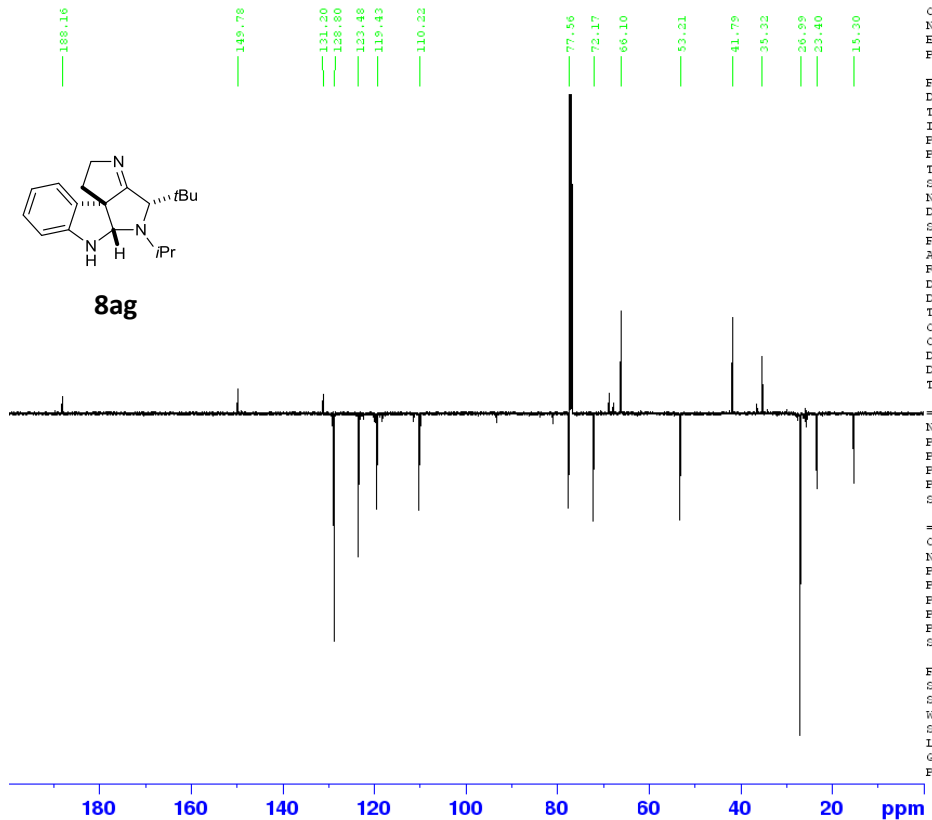

Current Data Parameters  
 NAME BOR-025-1  
 EXPNO 4  
 PROCNO 1

F2 - Acquisition Parameters  
 Date\_ 20160716  
 Time 13.08  
 INSTRUM spect  
 PROBHD 5 mm CPTCI 1H-  
 PULPROG jmod  
 TD 65536  
 SOLVENT CDCl3  
 NS 2000  
 DS 4  
 SWH 29761.904 Hz  
 FIDRES 0.454131 Hz  
 AQ 1.1010048 sec  
 RG 2050  
 DW 16.800 usec  
 DE 6.50 usec  
 TE 286.9 K  
 CNST2 145.0000000  
 CNST11 1.0000000  
 D1 2.00000000 sec  
 D20 0.00689655 sec  
 TDO 1

===== CHANNEL f1 =====  
 NUC1 13C  
 P1 11.20 usec  
 F2 22.40 usec  
 PL1 -2.00 dB  
 PL1W 88.77790070 W  
 SFO1 125.8055709 MHz

===== CHANNEL f2 =====  
 CPDPRG[2] waltz16  
 NUC2 1H  
 FCPD2 80.00 usec  
 PL2 4.00 dB  
 PL12 25.28 dB  
 PL2W 8.72000027 W  
 PL12W 0.06494062 W  
 SFO2 500.2720011 MHz

F2 - Processing parameters  
 SI 32768  
 SF 125.7929818 MHz  
 WDW EM  
 SSB 0  
 LB 1.00 Hz  
 GB 0  
 PC 1.40

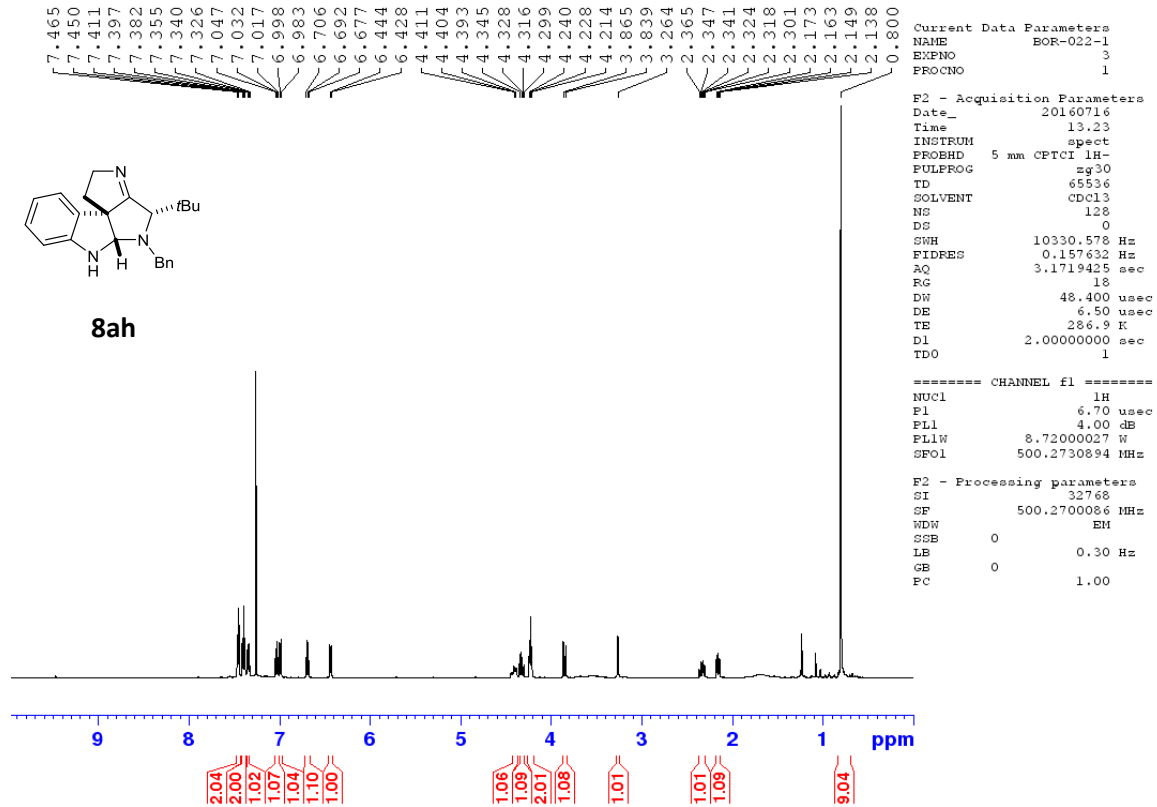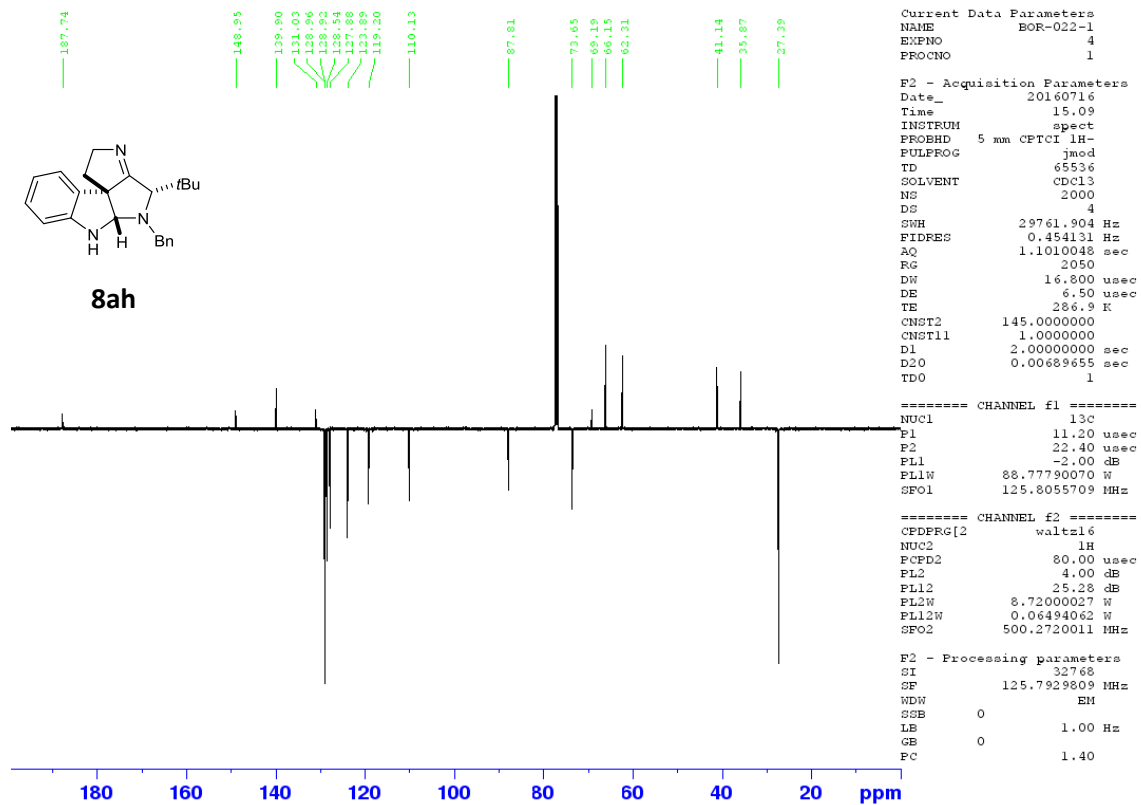

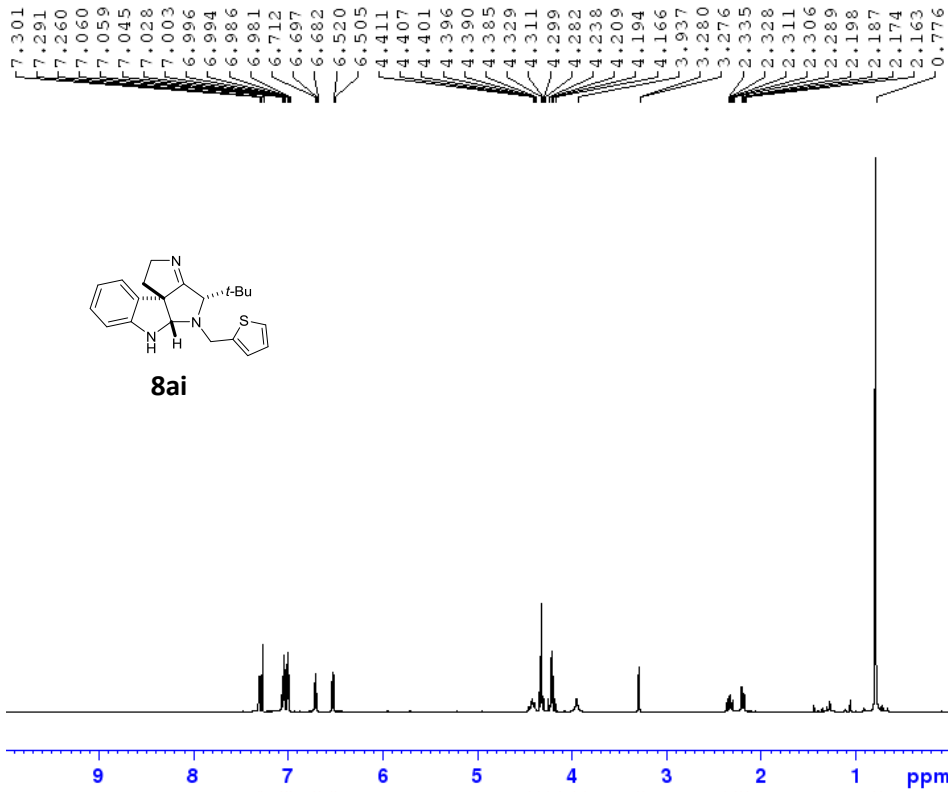

Current Data Parameters  
 NAME JMS-291B  
 EXPNO 1  
 PROCNO 1

F2 - Acquisition Parameters  
 Date\_ 20160909  
 Time 18.07  
 INSTRUM spect  
 PROBHD 5 mm CPTCI 1H-  
 PULPROG zg30  
 ID 65536  
 SOLVENT CDCl3  
 NS 16  
 DS 2  
 SWH 10330.578 Hz  
 FIDRES 0.157632 Hz  
 AQ 3.1719425 sec  
 RG 10  
 DW 48.400 usec  
 DE 6.50 usec  
 TE 298.3 K  
 D1 1.00000000 sec  
 TDO 1

----- CHANNEL f1 -----  
 NUC1 1H  
 P1 6.70 usec  
 PL1 4.00 dB  
 PL1W 8.72000027 W  
 SFO1 500.2730894 MHz

F2 - Processing parameters  
 SI 32768  
 SF 500.2700081 MHz  
 WDW EM  
 SSB 0  
 LB 0.30 Hz  
 GB 0  
 PC 1.00

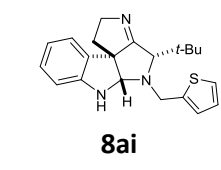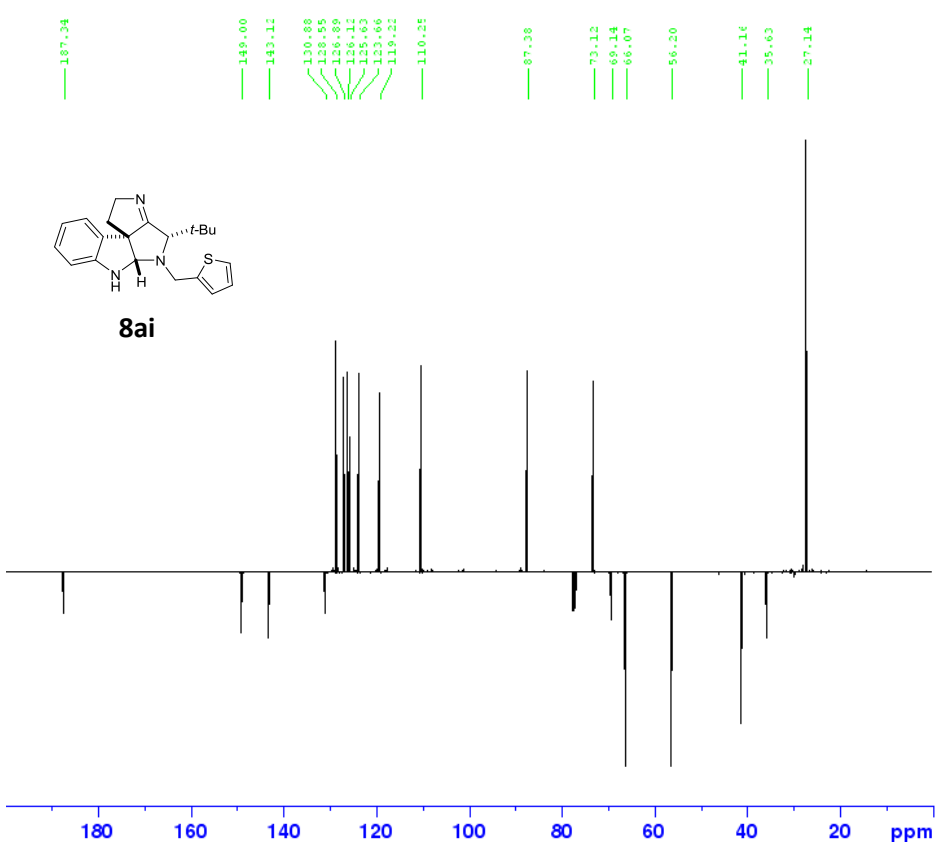

Current Data Parameters  
 NAME JMS-291B  
 EXPNO 2  
 PROCNO 1

F2 - Acquisition Parameters  
 Date\_ 20160909  
 Time 18.21  
 INSTRUM spect  
 PROBHD 5 mm CPTCI 1H-  
 PULPROG jmod  
 ID 65536  
 SOLVENT CDCl3  
 NS 256  
 DS 4  
 SWH 29761.904 Hz  
 FIDRES 0.454131 Hz  
 AQ 1.1010048 sec  
 RG 2050  
 DW 16.800 usec  
 DE 6.50 usec  
 TE 298.2 K  
 CHST2 145.0000000  
 CHST11 1.0000000  
 D1 2.00000000 sec  
 D20 0.00689655 sec  
 TDO 1

----- CHANNEL f1 -----  
 NUC1 13C  
 P1 11.20 usec  
 P2 23.40 usec  
 PL1 -2.00 dB  
 PL1W 88.77790070 W  
 SFO1 125.8055709 MHz

----- CHANNEL f2 -----  
 CPDPRG[2] waltz16  
 NUC2 1H  
 PCPD2 80.00 usec  
 PL2 4.00 dB  
 PL12 25.28 dB  
 PL2W 8.72000027 W  
 PL12W 0.06494062 W  
 SFO2 500.2720011 MHz

F2 - Processing parameters  
 SI 32768  
 SF 125.7929920 MHz  
 WDW EM  
 SSB 0  
 LB 1.00 Hz  
 GB 0  
 PC 1.40

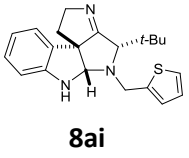

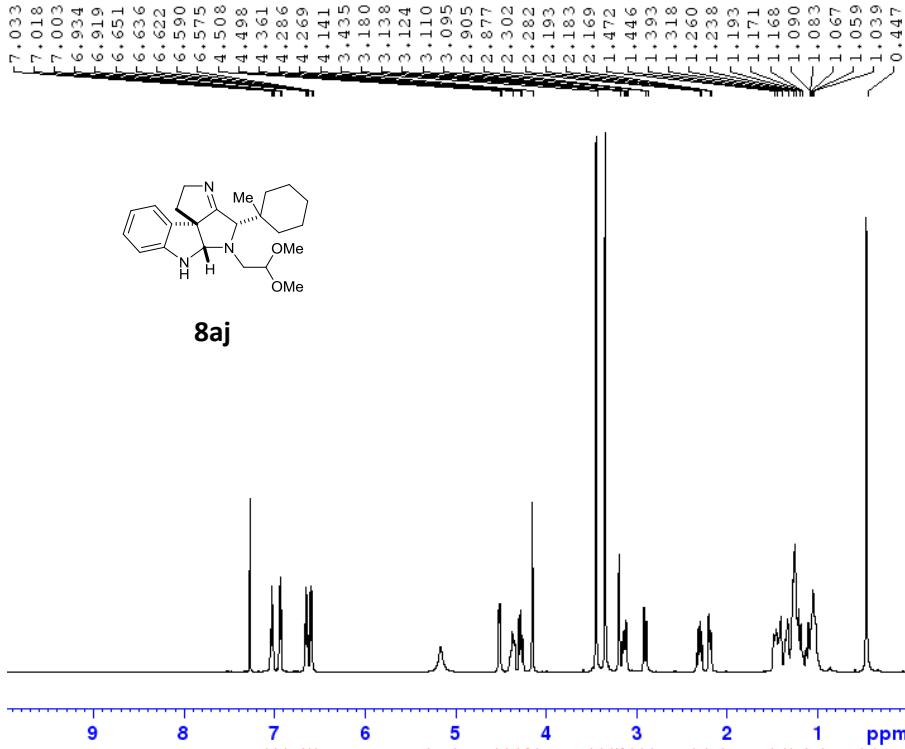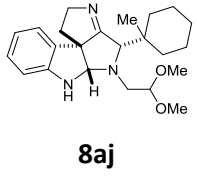

Current Data Parameters  
 NAME JMS-289B  
 EXPNO 2  
 PROCNO 1

F2 - Acquisition Parameters  
 Date\_ 20160909  
 Time 10.56  
 INSTRUM spect  
 PROBHD 5 mm CPTCI 1H-  
 PULPROG zg30  
 ID 65536  
 SOLVENT CDCl3  
 NS 16  
 DS 2  
 SWH 10330.578 Hz  
 FIDRES 0.157632 Hz  
 AQ 3.1719425 sec  
 RG 8  
 DW 48.400 usec  
 DE 6.50 usec  
 TE 298.3 K  
 D1 1.00000000 sec  
 TDO 1

----- CHANNEL f1 -----  
 NUC1 1H  
 P1 6.70 usec  
 PL1 4.00 dB  
 PLLW 8.72000027 W  
 SFO1 500.2730894 MHz

F2 - Processing parameters  
 SI 32768  
 SF 500.2700082 MHz  
 WDW EM  
 SSB 0  
 LB 0.30 Hz  
 GB 0  
 PC 1.00

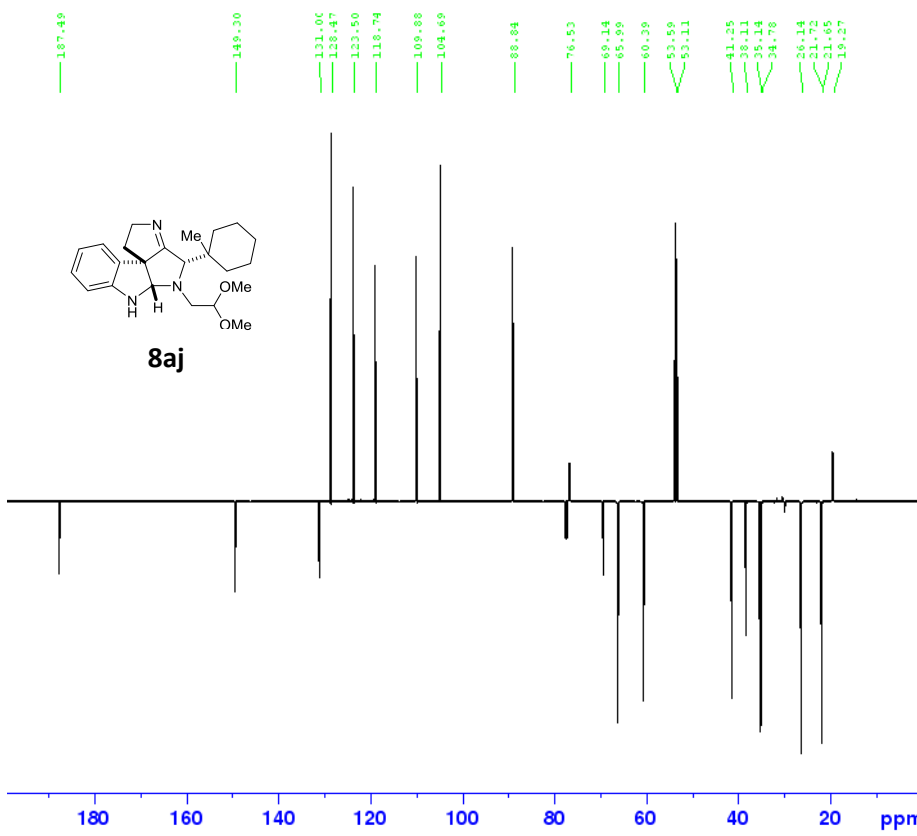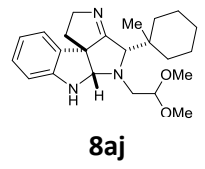

Current Data Parameters  
 NAME JMS-289B  
 EXPNO 3  
 PROCNO 1

F2 - Acquisition Parameters  
 Date\_ 20160909  
 Time 11.10  
 INSTRUM spect  
 PROBHD 5 mm CPTCI 1H-  
 PULPROG jmod  
 ID 65536  
 SOLVENT CDCl3  
 NS 4  
 DS 4  
 SWH 29761.904 Hz  
 FIDRES 0.454131 Hz  
 AQ 1.1010048 sec  
 RG 2050  
 DW 16.800 usec  
 DE 6.50 usec  
 TE 298.2 K  
 CHST2 145.0000000  
 CHST11 1.0000000  
 D1 2.00000000 sec  
 D20 0.00689655 sec  
 TDO 1

----- CHANNEL f1 -----  
 NUC1 13C  
 P1 11.20 usec  
 P2 23.40 usec  
 PL1 -2.00 dB  
 PLLW 88.77790070 W  
 SFO1 125.8055709 MHz

----- CHANNEL f2 -----  
 CPDPRG2 waltz16  
 NUC2 1H  
 P1 80.00 usec  
 PL2 4.00 dB  
 PL12 25.28 dB  
 PL2W 8.72000027 W  
 PL12W 0.06494062 W  
 SFO2 500.2720011 MHz

F2 - Processing parameters  
 SI 32768  
 SF 125.7929933 MHz  
 WDW EM  
 SSB 0  
 LB 1.00 Hz  
 GB 0  
 PC 1.40

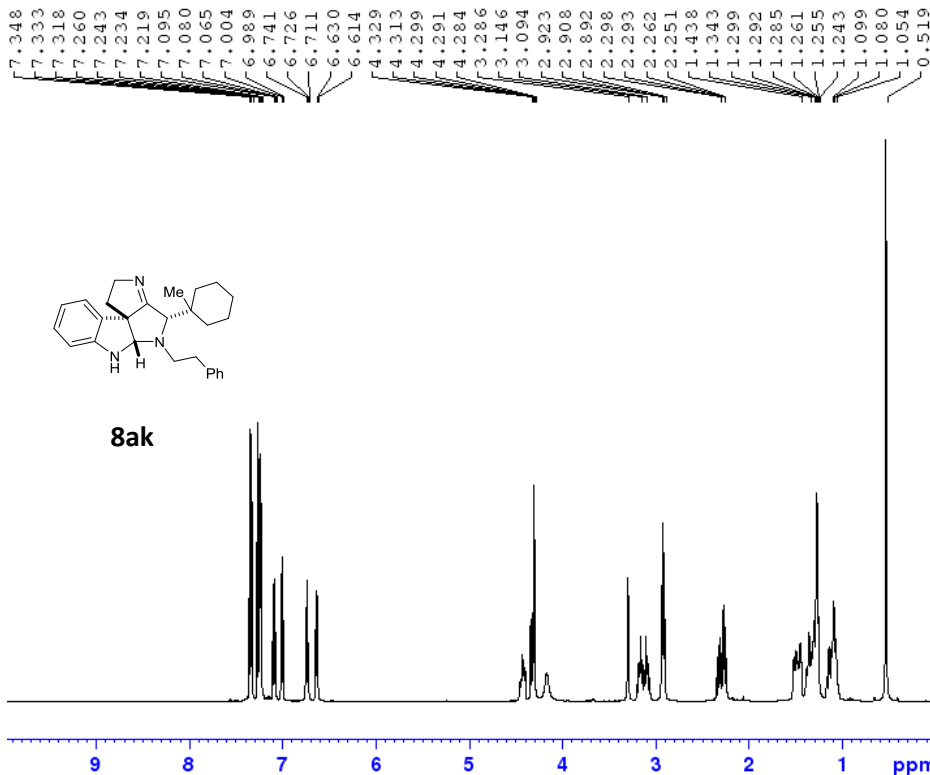

Current Data Parameters  
NAME JMS-289A2  
EXPNO 2  
PROCNO 1

F2 - Acquisition Parameters  
Date\_ 20160909  
Time 17.42  
INSTRUM spect  
PROBHD 5 mm CPTCI LH-  
PULPROG zg30  
TD 65536  
SOLVENT CDCl3  
NS 16  
DS 2  
SWH 10330.578 Hz  
FIDRES 0.157632 Hz  
AQ 3.1719425 sec  
RG 10  
DW 48.400 usec  
DE 6.50 usec  
TE 298.3 K  
D1 1.00000000 sec  
TDO 1

----- CHANNEL f1 -----  
NUC1 1H  
P1 6.70 usec  
PL1 4.00 dB  
PLLW 8.72000027 W  
SFO1 500.2730894 MHz

F2 - Processing parameters  
SI 32768  
SF 500.2700082 MHz  
WDW EM  
SSB 0  
LB 0.30 Hz  
GB 0  
PC 1.00

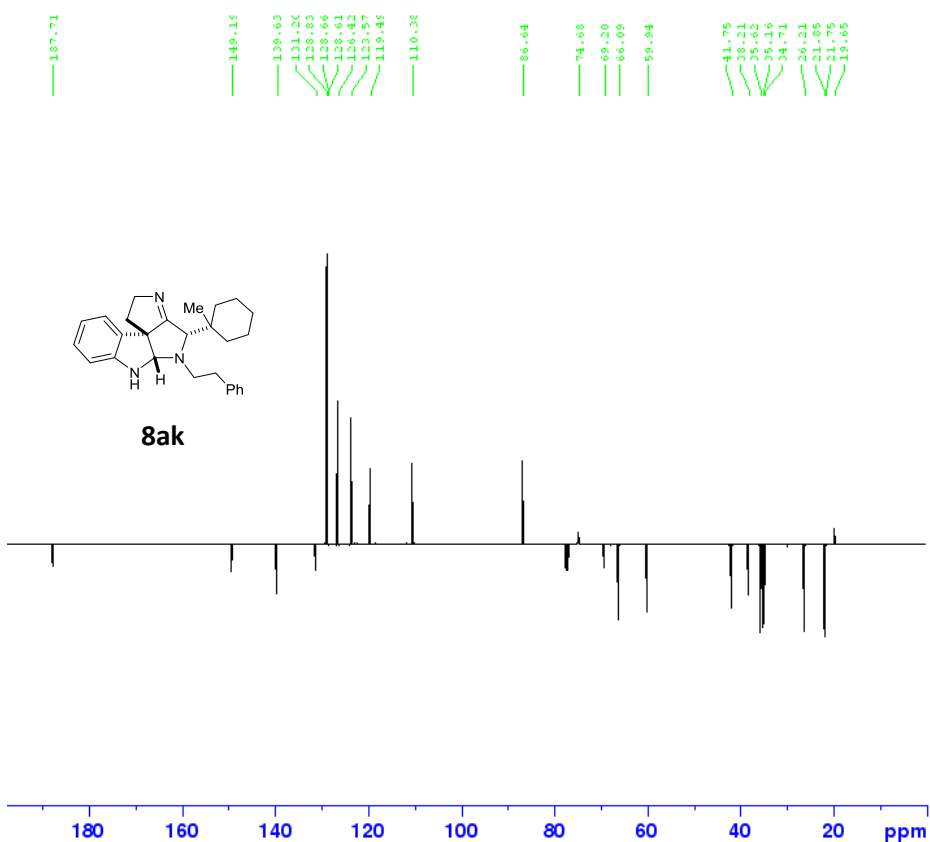

Current Data Parameters  
NAME JMS-289A2  
EXPNO 3  
PROCNO 1

F2 - Acquisition Parameters  
Date\_ 20160909  
Time 17.56  
INSTRUM spect  
PROBHD 5 mm CPTCI LH-  
PULPROG jmod  
TD 65536  
SOLVENT CDCl3  
NS 256  
DS 4  
SWH 29761.904 Hz  
FIDRES 0.454131 Hz  
AQ 1.1010048 sec  
RG 2050  
DW 16.800 usec  
DE 6.50 usec  
TE 298.2 K  
CHST2 145.0000000  
CHST11 1.0000000  
D1 2.00000000 sec  
D20 0.00689655 sec  
TDO 1

----- CHANNEL f1 -----  
HNC1 13C  
P1 11.20 usec  
P2 22.40 usec  
PL1 -2.00 dB  
PLLW 88.77790070 W  
SFO1 125.8055709 MHz

----- CHANNEL f2 -----  
CPDPRG[2] waltz16  
NUC2 1H  
PCPD2 80.00 usec  
PL2 4.00 dB  
PLI2 25.28 dB  
PLEW 8.72000027 W  
FLI2W 0.06494962 W  
SFO2 500.2720011 MHz

F2 - Processing parameters  
SI 32768  
SF 125.7929894 MHz  
WDW EM  
SSB 0  
LB 1.00 Hz  
GB 0  
PC 1.40

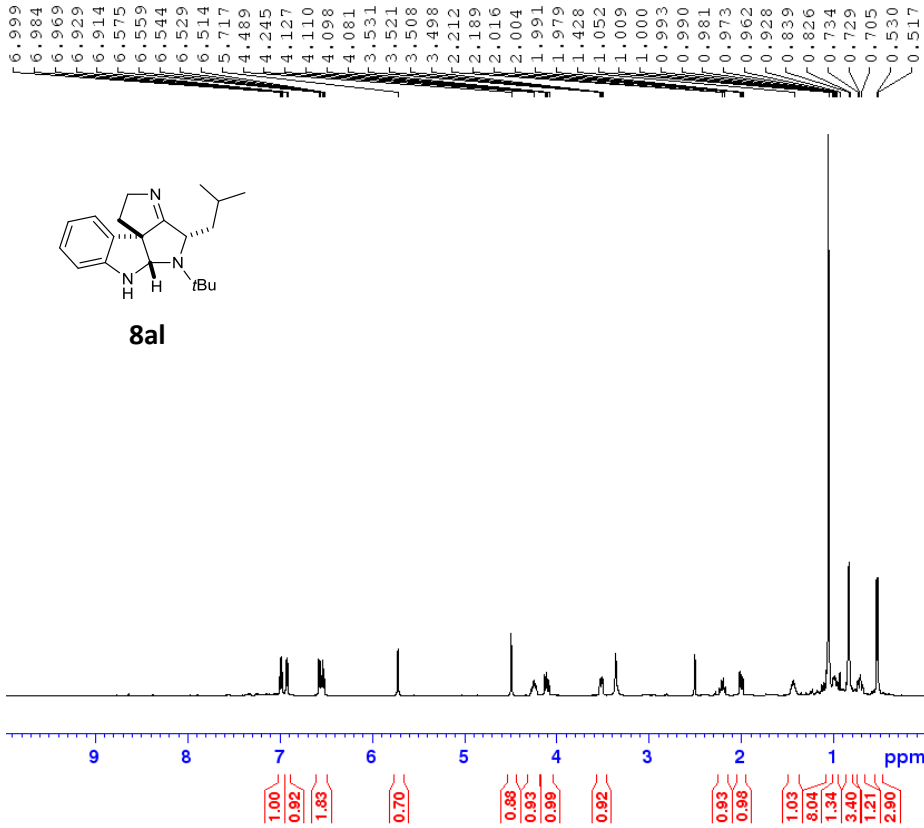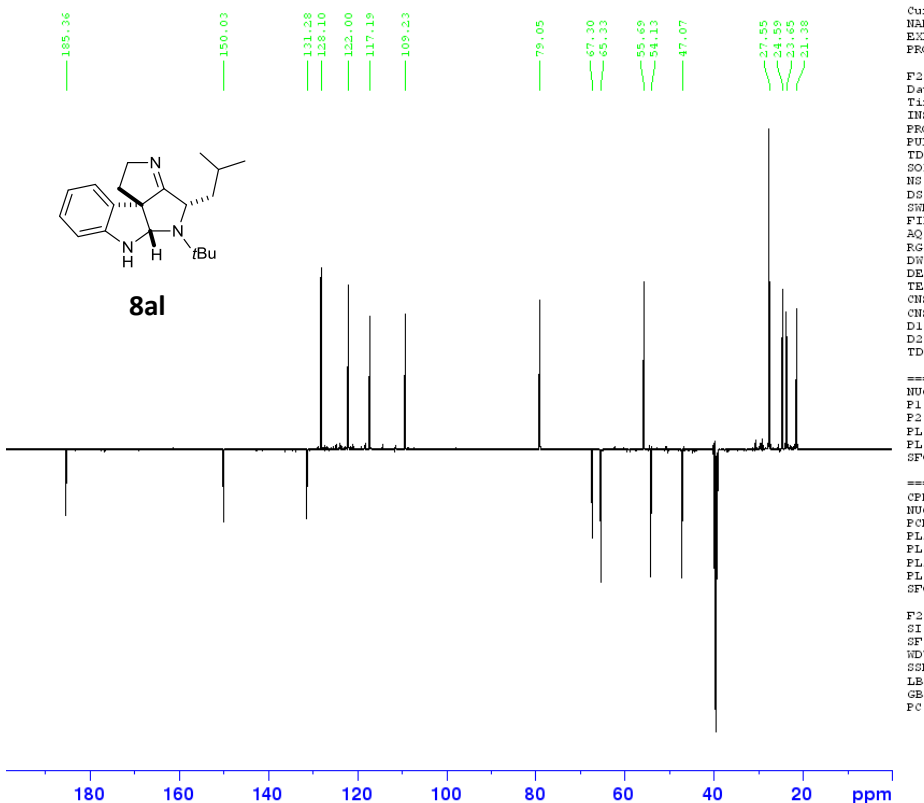



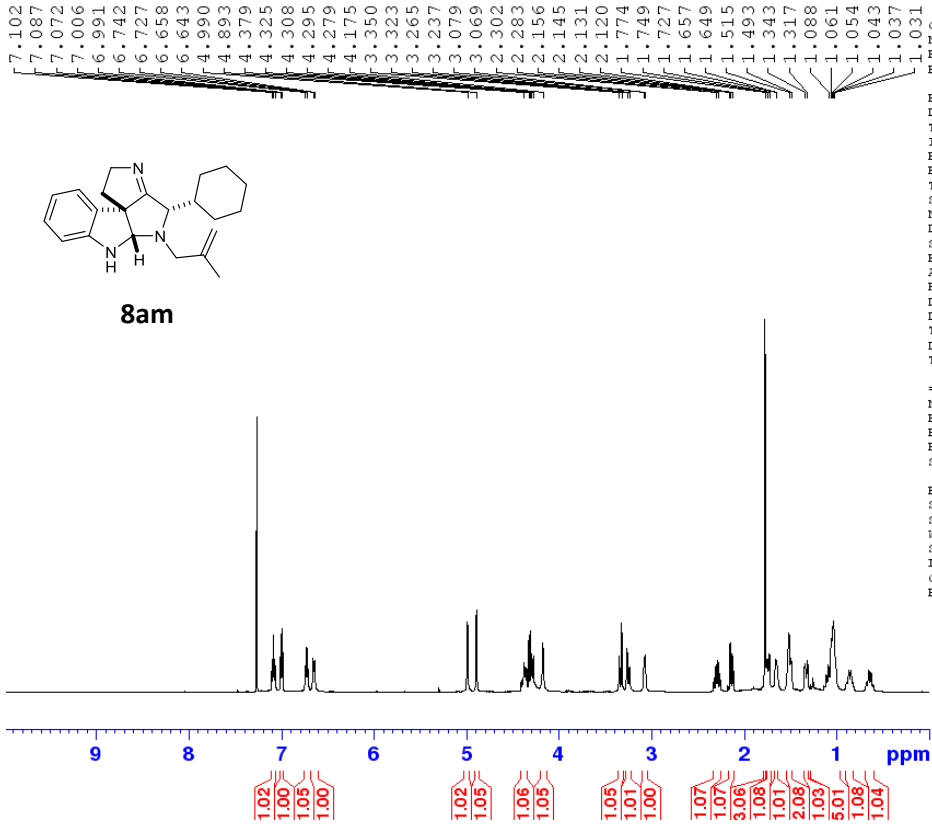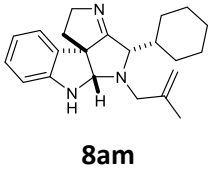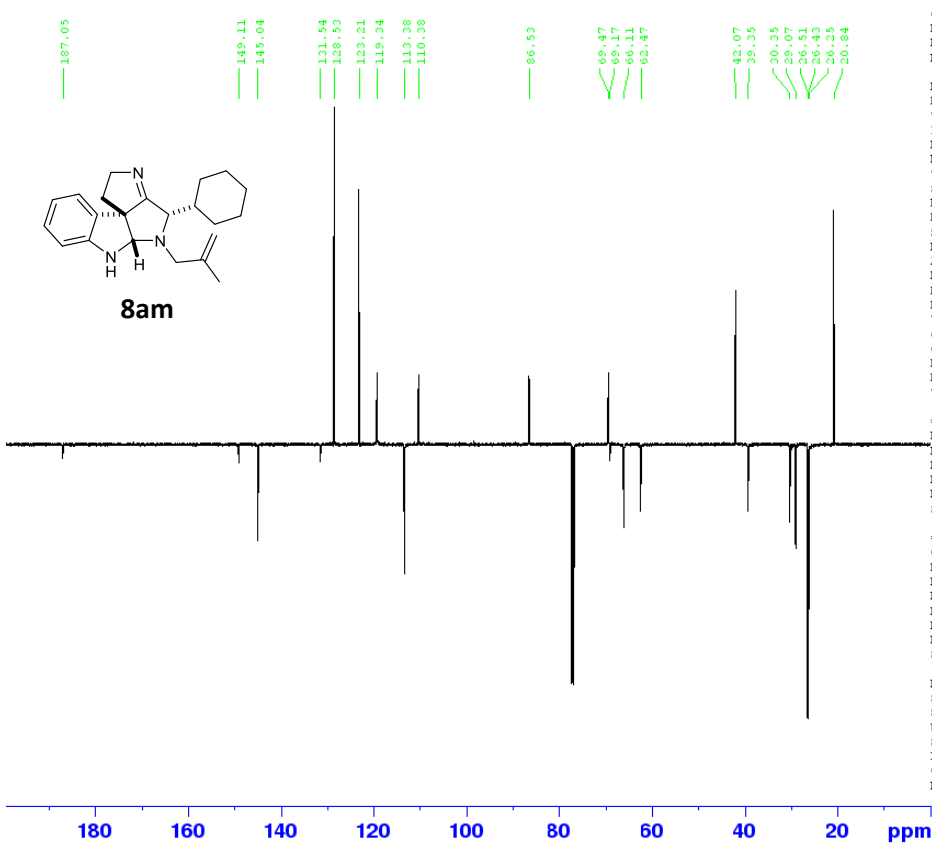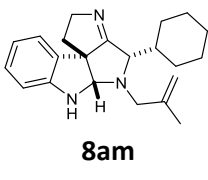

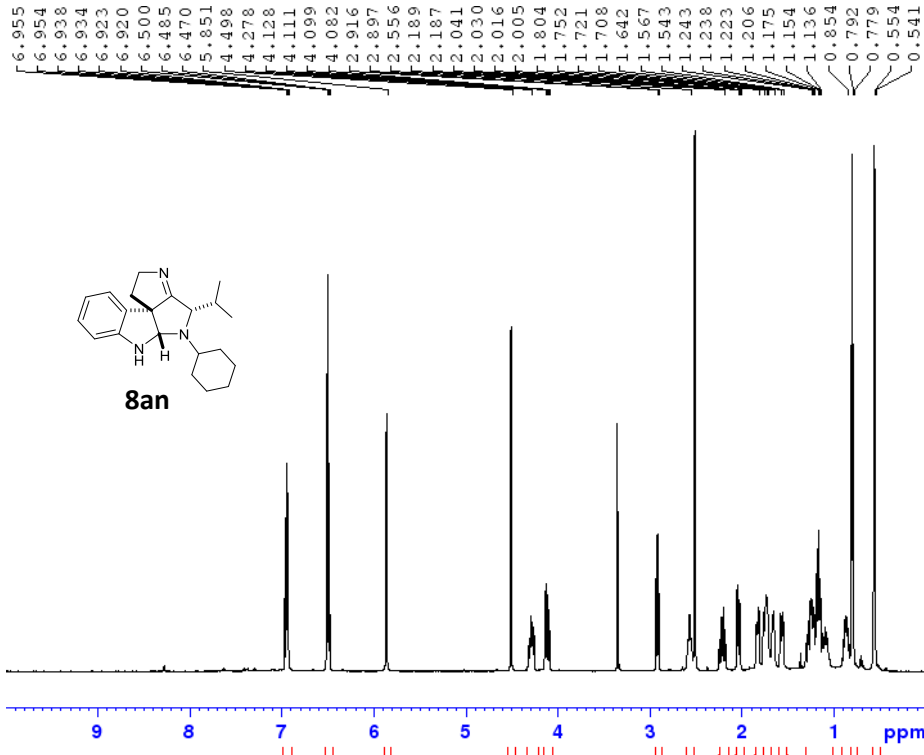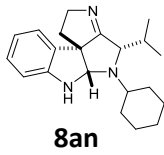

Current Data Parameters  
 NAME JMS-287B1  
 EXPNO 7  
 PROCNO 1

F2 - Acquisition Parameters  
 Date\_ 20160909  
 Time 10.33  
 INSTRUM spect  
 PROBHD 5 mm CPIC1 1H-  
 PULPROG zg30  
 ID 65536  
 SOLVENT DMSO  
 NS 16  
 DS 2  
 SWH 10330.578 Hz  
 FIDRES 0.157632 Hz  
 AQ 3.1719425 sec  
 RG 14.2  
 DW 48.400 usec  
 DE 6.50 usec  
 TE 298.2 K  
 D1 1.00000000 sec  
 TDO 1

----- CHANNEL f1 -----  
 NUC1 1H  
 P1 6.70 usec  
 PLL 4.00 dB  
 PLW 8.72000027 W  
 SFO1 500.2730894 MHz

F2 - Processing parameters  
 SI 32768  
 SF 500.2699995 MHz  
 WDW EM  
 SSB 0  
 LB 0.30 Hz  
 GB 0  
 PC 1.00

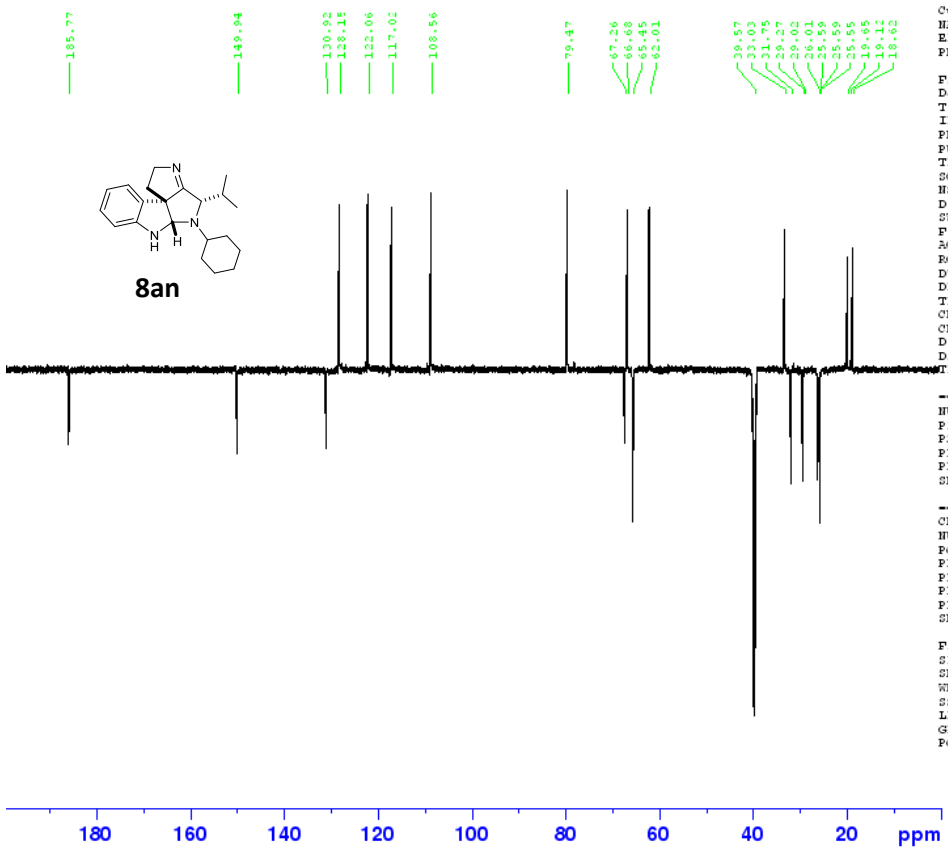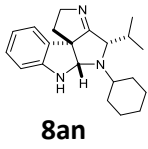

Current Data Parameters  
 NAME JMS-287B1  
 EXPNO 4  
 PROCNO 1

F2 - Acquisition Parameters  
 Date\_ 20160908  
 Time 2.28  
 INSTRUM spect  
 PROBHD 5 mm CPIC1 1H-  
 PULPROG jmod  
 ID 65536  
 SOLVENT DMSO  
 NS 512  
 DS 4  
 SWH 29761.904 Hz  
 FIDRES 0.454131 Hz  
 AQ 1.1010048 sec  
 RG 2050  
 DW 16.800 usec  
 DE 6.50 usec  
 TE 298.2 K  
 CHST2 145.00000000  
 CHST11 1.00000000  
 D1 2.00000000 sec  
 D20 0.00689655 sec  
 TDO 1

----- CHANNEL f1 -----  
 NUC1 13C  
 P1 11.20 usec  
 P2 22.40 usec  
 PLL -2.00 dB  
 PLW 88.77790070 W  
 SFO1 125.8055709 MHz

----- CHANNEL f2 -----  
 CPDPRG[2] waltz16  
 NUC2 1H  
 PCPD2 80.00 usec  
 PL2 4.00 dB  
 PLL2 25.28 dB  
 PLW 8.72000027 W  
 PLW 0.06494062 W  
 SFO2 500.2720011 MHz

F2 - Processing parameters  
 SI 32768  
 SF 125.7930473 MHz  
 WDW EM  
 SSB 0  
 LB 1.00 Hz  
 GB 0  
 PC 1.40

8.063  
7.558  
7.542  
7.322  
7.307  
7.290  
7.276  
7.273  
7.259  
7.221  
7.208  
7.192  
7.150  
7.135  
7.120  
7.045  
7.030  
4.265  
4.250  
4.190  
4.180  
4.173  
4.163  
3.898  
3.871  
3.400  
3.372  
2.563  
2.541  
2.402  
2.399  
2.389  
2.385  
2.375  
2.372  
2.130  
2.121  
2.114  
2.104  
2.094  
1.435  
1.429  
0.708  
0.696

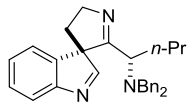

12aa

Current Data Parameters  
NAME BOR-030-2  
EXPNO 4  
PROCNO 1

F2 - Acquisition Parameters  
Date\_ 20160701  
Time 22.37  
INSTRUM spect  
PROBHD 5 mm CPTCI 1H-  
PULPROG zg30  
TD 65536  
SOLVENT cdcl3  
NS 16  
DS 2  
SWH 10330.578 Hz  
FIDRES 0.157632 Hz  
AQ 3.1719425 sec  
RG 14.2  
DW 48.400 usec  
DE 6.50 usec  
TE 298.3 K  
D1 1.00000000 sec  
TDO 1

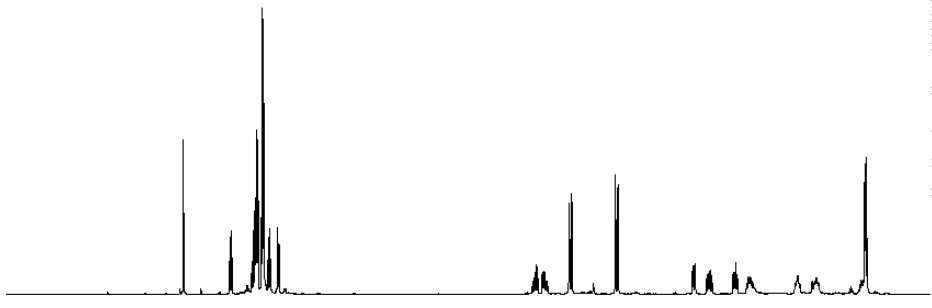

===== CHANNEL f1 =====  
NUC1 1H  
P1 6.70 usec  
PL1 4.00 dB  
PL1W 8.72000027 W  
SFO1 500.2730894 MHz

F2 - Processing parameters  
SI 32768  
SF 500.27000000 MHz  
WDW EM  
SSB 0  
LB 0.30 Hz  
GB 0  
FC 1.00

1.02  
1.00  
0.92  
4.91  
5.11  
1.08  
1.08  
1.06  
1.07  
2.04  
1.97  
1.00  
1.06  
1.72  
0.99  
1.01  
2.96

174.40  
173.12  
155.67  
139.37  
138.87  
139.11  
138.43  
138.32  
136.93  
136.32  
121.61  
121.37  
74.16  
60.61  
57.44  
54.29  
31.84  
25.14  
19.76  
13.99

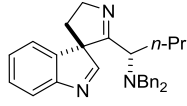

12aa

Current Data Parameters  
NAME BOR-030-2  
EXPNO 5  
PROCNO 1

F2 - Acquisition Parameters  
Date\_ 20160701  
Time 23.05  
INSTRUM spect  
PROBHD 5 mm CPTCI 1H-  
PULPROG jmod  
TD 65536  
SOLVENT cdcl3  
NS 512  
DS 4  
SWH 29761.904 Hz  
FIDRES 0.454131 Hz  
AQ 1.1010048 sec  
RG 2050  
DW 16.800 usec  
DE 6.50 usec  
TE 298.2 K  
CNST2 145.0000000  
CNST11 1.0000000  
D1 2.00000000 sec  
D20 0.00689655 sec  
TDO 1

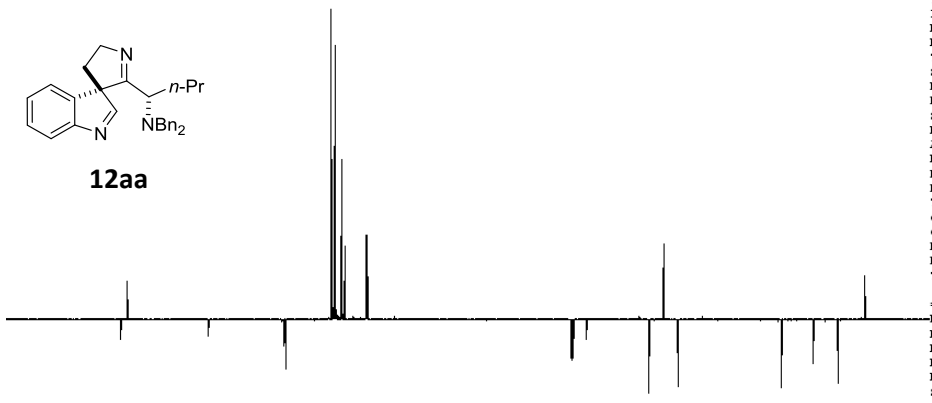

===== CHANNEL f1 =====  
NUC1 13C  
P1 11.20 usec  
P2 22.40 usec  
PL1 -2.00 dB  
PL1W 88.77790070 W  
SFO1 125.8055709 MHz

===== CHANNEL f2 =====  
CPDPRG[2] waltz16  
NUC2 1H  
PCPD2 80.00 usec  
PL2 4.00 dB  
PL12 25.28 dB  
PL2W 8.72000027 W  
PL12W 0.06494062 W  
SFO2 500.2720011 MHz

F2 - Processing parameters  
SI 32768  
SF 125.7929818 MHz  
WDW EM  
SSB 0  
LB 1.00 Hz  
GB 0  
FC 1.40

180  
160  
140  
120  
100  
80  
60  
40  
20  
ppm

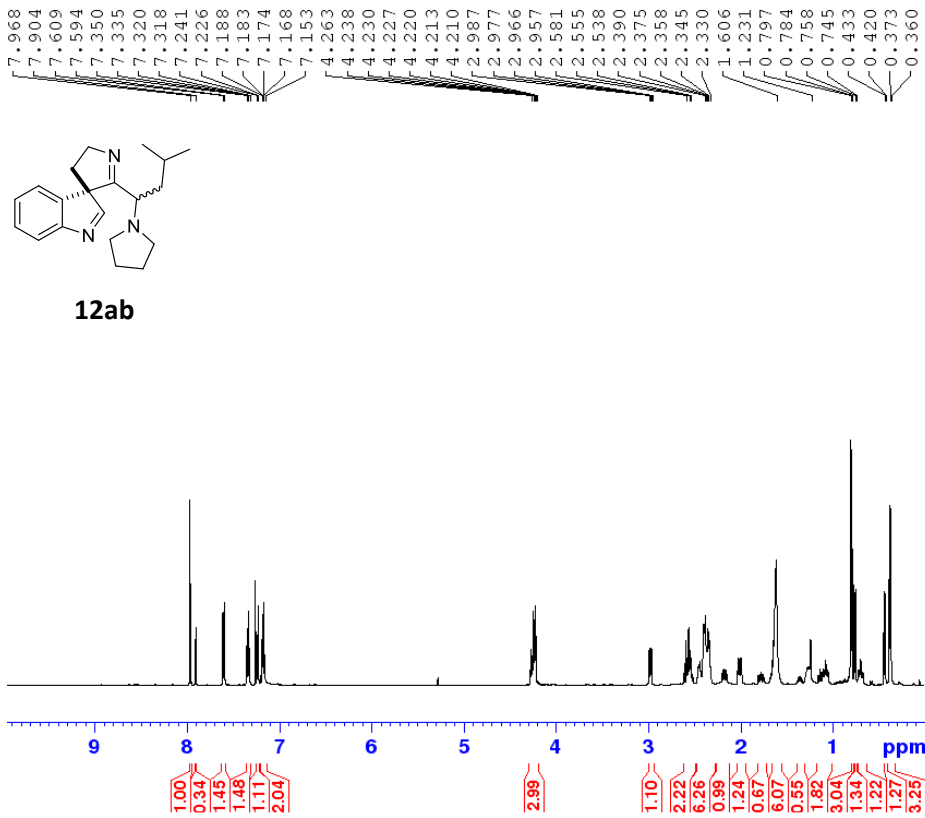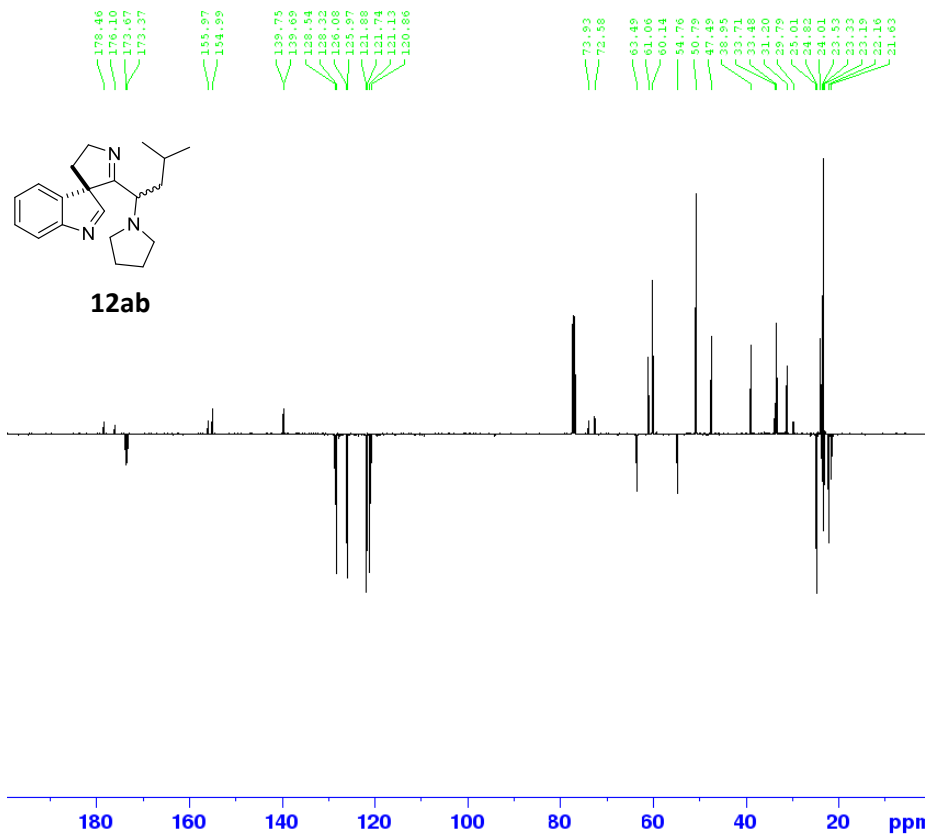

Current Data Parameters  
NAME JMS-243a  
EXFNO 1  
PROCNO 1

F2 - Acquisition Parameters  
Date\_ 20160615  
Time 20.33  
INSTRUM spect  
PROBHD 5 mm CPTCI 1H-  
PULPROG zg30  
TD 65536  
SOLVENT cdcl3  
NS 16  
DS 2  
SWH 10330.578 Hz  
FIDRES 0.157632 Hz  
AQ 3.1719425 sec  
RG 12.7  
DW 48.400 usec  
DE 6.50 usec  
TE 298.3 K  
D1 1.00000000 sec  
TDO 1

===== CHANNEL f1 =====  
NUC1 1H  
P1 6.70 usec  
PL1 4.00 dB  
PL1W 8.72000027 W  
SFO1 500.2730894 MHz

F2 - Processing parameters  
SI 32768  
SF 500.2700085 MHz  
WDW EM  
SSB 0  
LB 0.30 Hz  
GB 0  
PC 1.00

Current Data Parameters  
NAME JMS-243a  
EXFNO 2  
PROCNO 1

F2 - Acquisition Parameters  
Date\_ 20160615  
Time 21.27  
INSTRUM spect  
PROBHD 5 mm CPTCI 1H-  
PULPROG jmod  
TD 65536  
SOLVENT cdcl3  
NS 1024  
DS 4  
SWH 29761.904 Hz  
FIDRES 0.454131 Hz  
AQ 1.1010048 sec  
RG 2050  
DW 16.800 usec  
DE 6.50 usec  
TE 298.2 K  
CNST2 145.0000000  
CNST11 1.0000000  
D1 2.00000000 sec  
D20 0.00689655 sec  
TDO 1

===== CHANNEL f1 =====  
NUC1 13C  
P1 11.20 usec  
P2 22.40 usec  
PL1 -2.00 dB  
PL1W 88.77790070 W  
SFO1 125.8055709 MHz

===== CHANNEL f2 =====  
CPDPRG[2] waltz16  
NUC2 1H  
PCPD2 80.00 usec  
PL2 4.00 dB  
PL12 25.28 dB  
PL2W 8.72000027 W  
FL12W 0.06494062 W  
SFO2 500.2720011 MHz

F2 - Processing parameters  
SI 32768  
SF 125.7929809 MHz  
WDW EM  
SSB 0  
LB 1.00 Hz  
GB 0  
PC 1.40

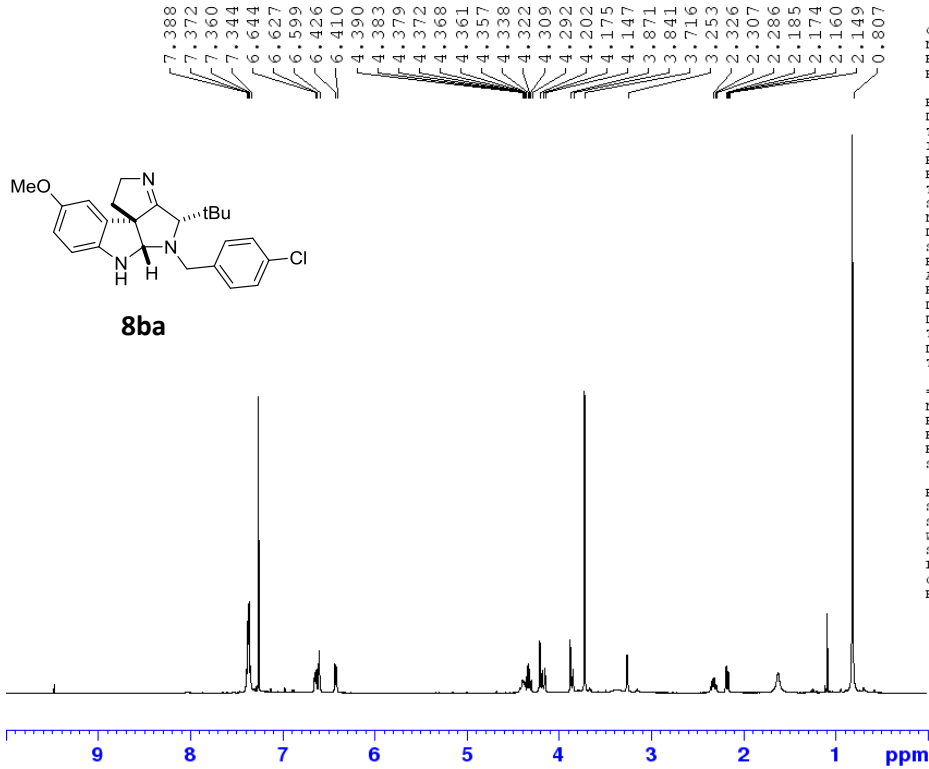

```

Current Data Parameters
NAME      JMS-270
EXPNO    1
PROCNO   1

F2 - Acquisition Parameters
Date_    20160709
Time     5.24
INSTRUM  spect
PROBHD   5 mm CPTCI 1H-
PULPROG  zg30
TD       65536
SOLVENT  cdcl3
NS       16
DS       2
SWH      10330.578 Hz
FIDRES   0.157632 Hz
AQ       3.1719425 sec
RG       18
DW       48.400 usec
DE       6.50 usec
TE       298.3 K
D1       1.00000000 sec
TDO      1

===== CHANNEL f1 =====
NUC1     1H
P1       6.70 usec
PLL      4.00 dB
PL1W     8.72000027 W
SFO1     500.2730894 MHz

F2 - Processing parameters
SI       32768
SF       500.2700085 MHz
WDW      EM
SSB      0
LB       0.30 Hz
GB       0
PC       1.00
  
```

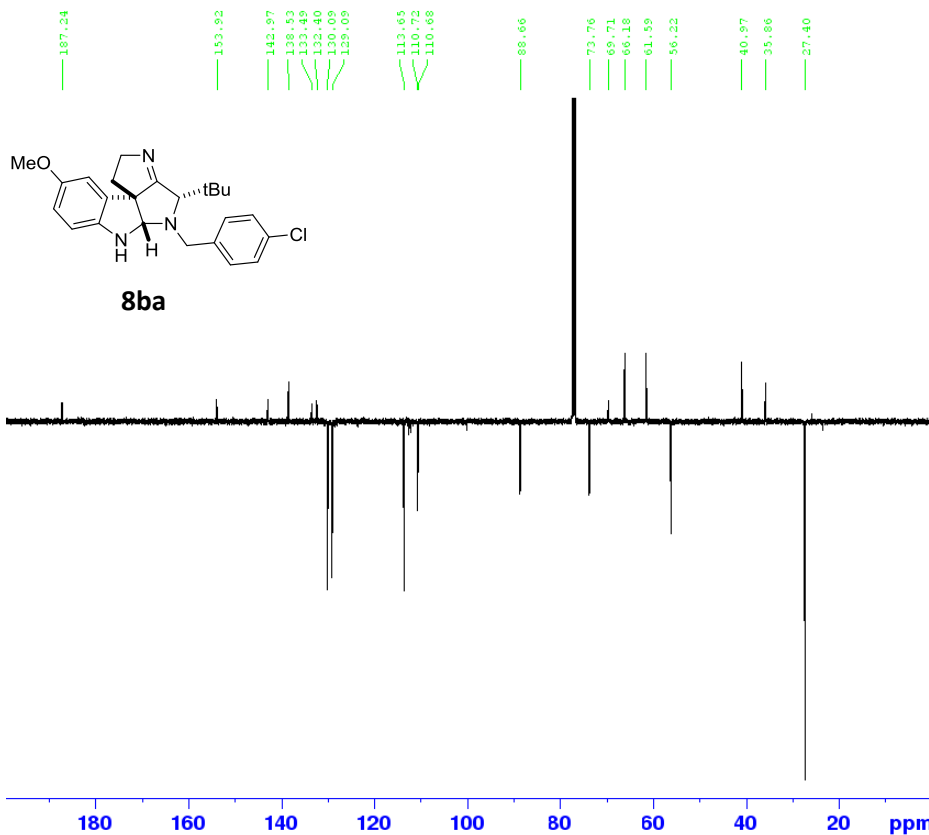

```

Current Data Parameters
NAME      JMS-270
EXPNO    2
PROCNO   1

F2 - Acquisition Parameters
Date_    20160709
Time     6.17
INSTRUM  spect
PROBHD   5 mm CPTCI 1H-
PULPROG  jmod
TD       65536
SOLVENT  cdcl3
NS       1000
DS       4
SWH      29761.904 Hz
FIDRES   0.454131 Hz
AQ       1.1010048 sec
RG       2050
DW       16.800 usec
DE       6.50 usec
TE       298.2 K
CNST2    145.0000000
CNST11   1.0000000
D1       2.00000000 sec
D20      0.00689655 sec
TDO      1

===== CHANNEL f1 =====
NUC1     13C
P1       11.20 usec
P2       22.40 usec
PL1      -2.00 dB
PL1W     88.77790070 W
SFO1     125.8055709 MHz

===== CHANNEL f2 =====
CPDPRG2  waltz16
NUC2     1H
PCPD2    80.00 usec
PL2      4.00 dB
PL12     25.28 dB
PL2W     8.72000027 W
PL12W    0.06494062 W
SFO2     500.2720011 MHz

F2 - Processing parameters
SI       32768
SF       125.7929764 MHz
WDW      EM
SSB      0
LB       1.00 Hz
GB       0
PC       1.40
  
```

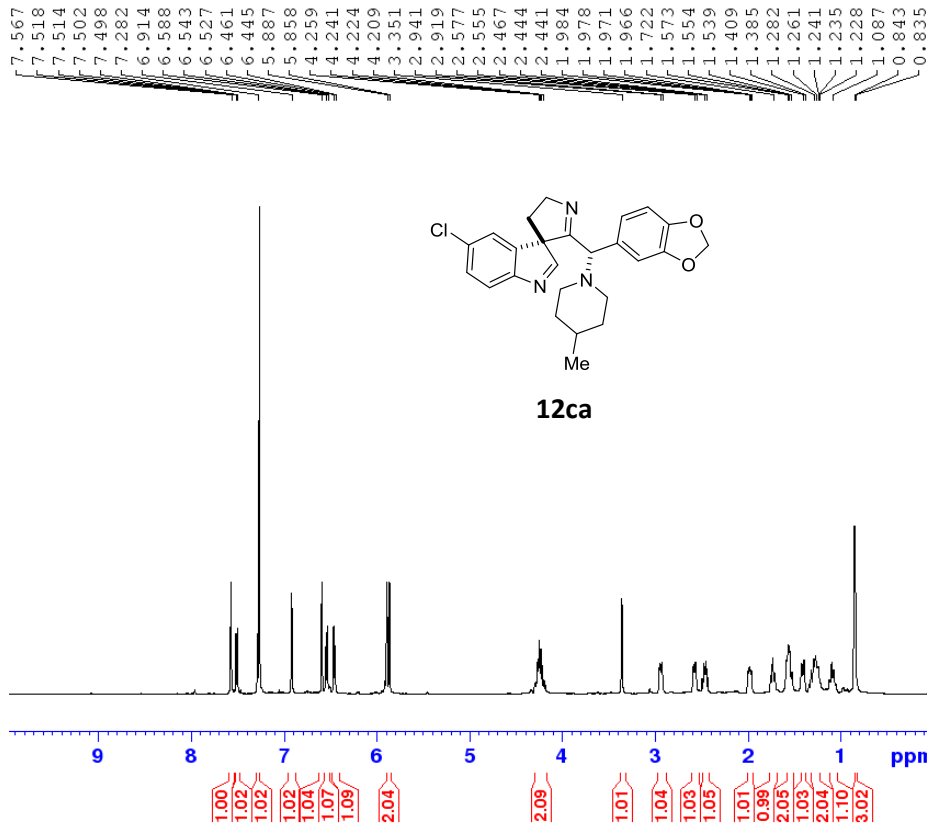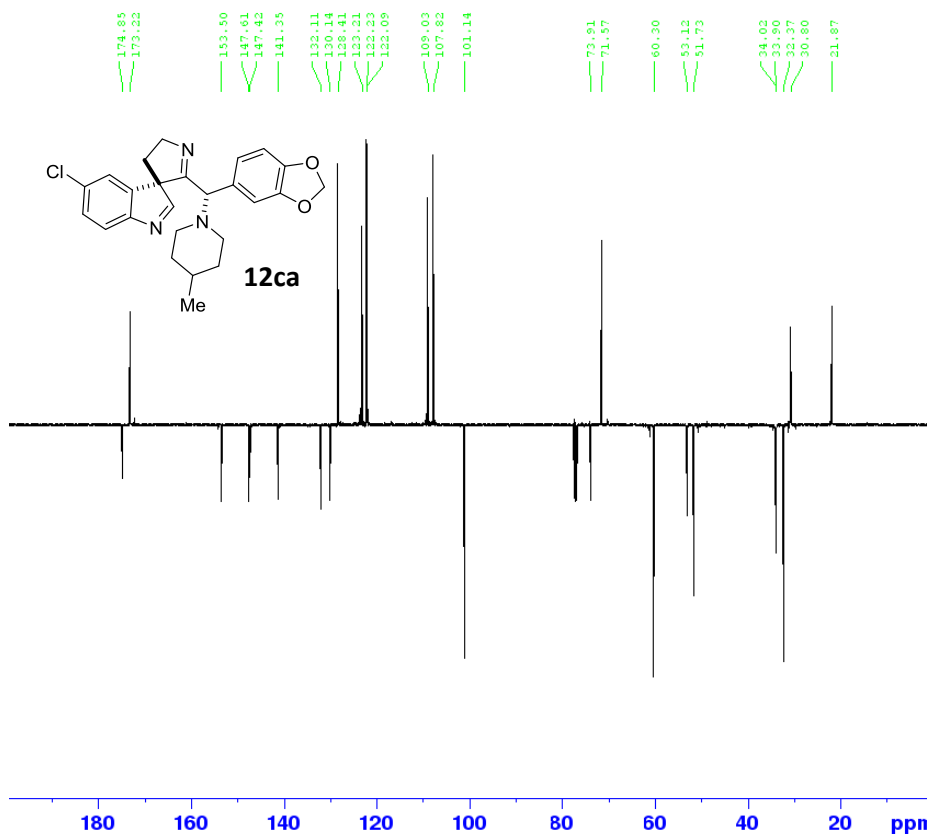

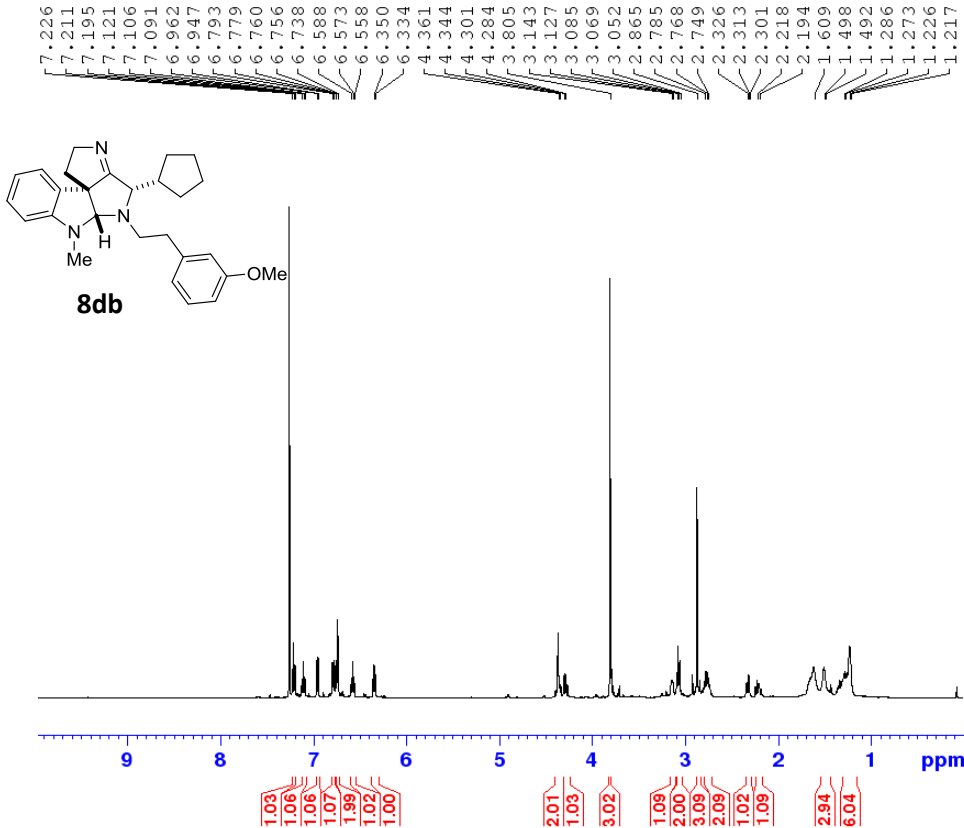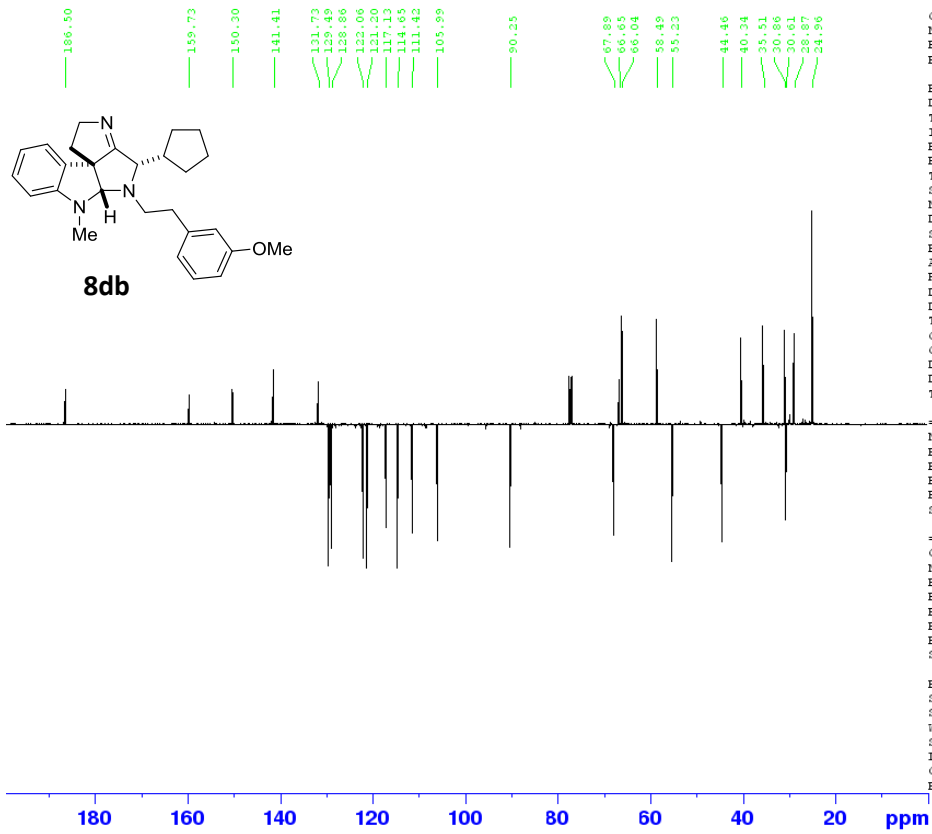

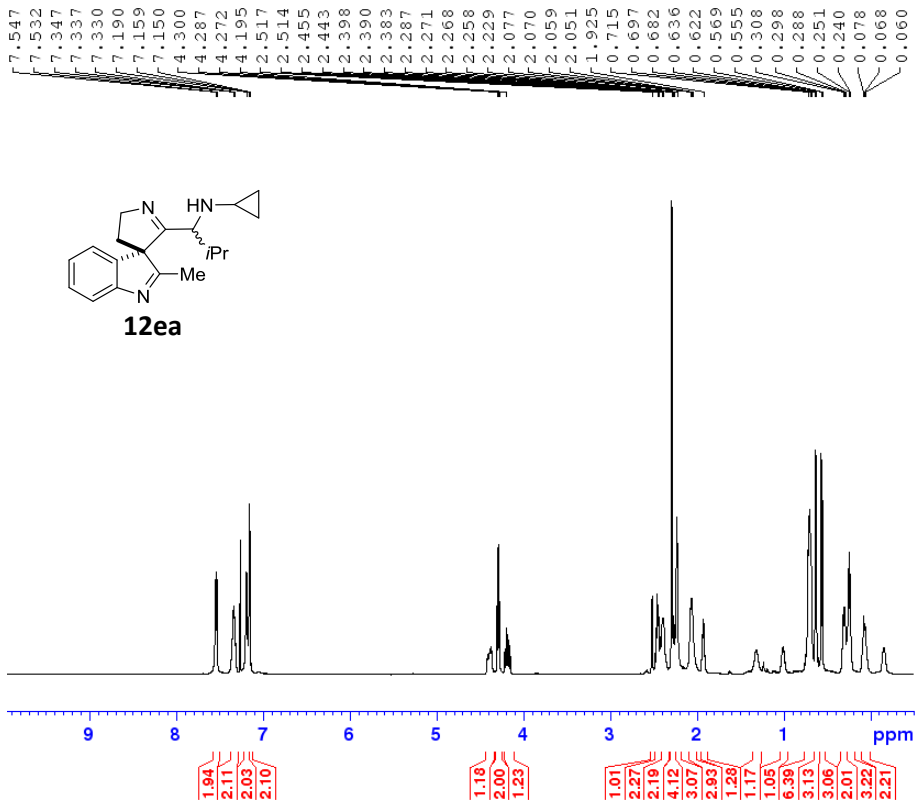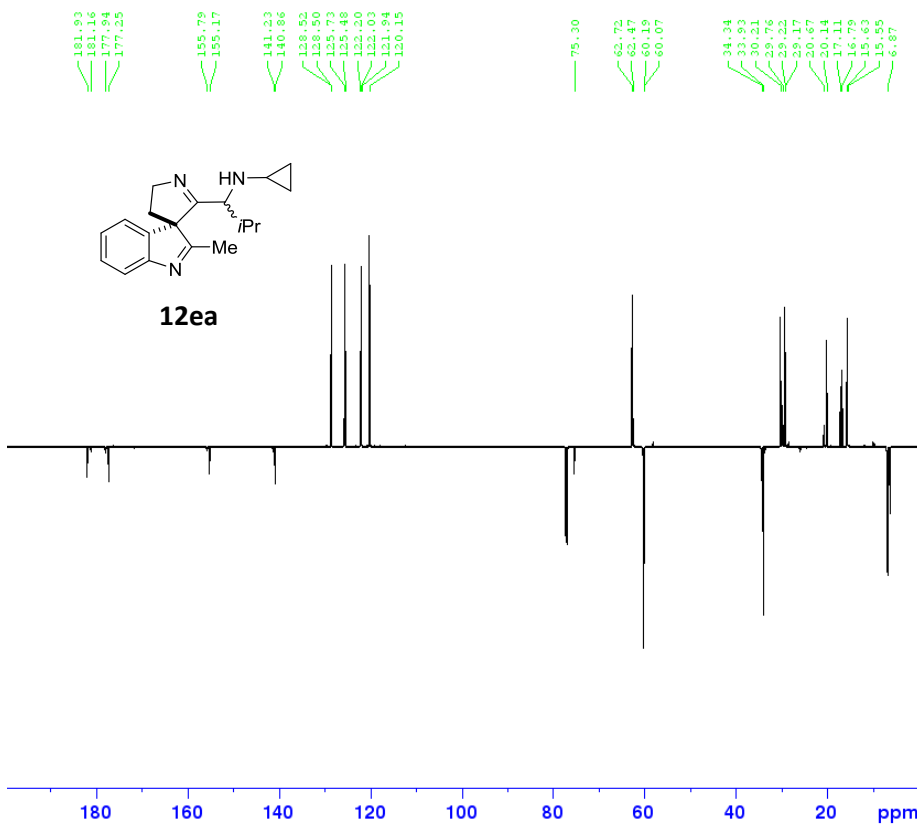



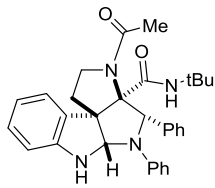

13a

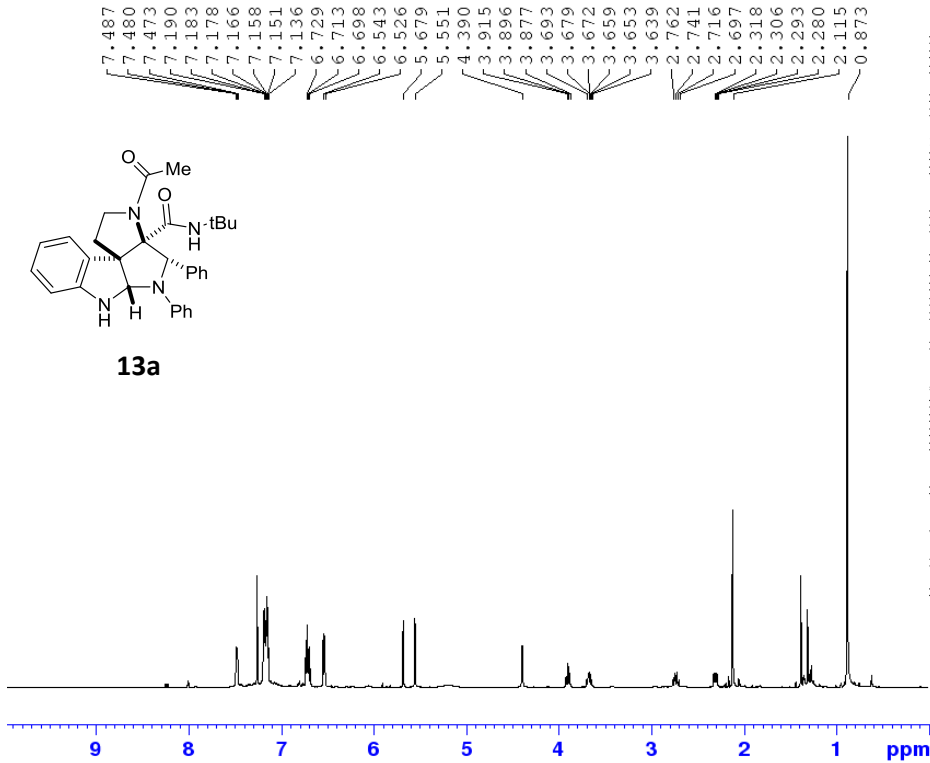

```
Current Data Parameters
NAME      JMS-237
EXPNO    5
PROCNO   1

F2 - Acquisition Parameters
Date_    20160722
Time     1.42
INSTRUM  spect
PROBHD   5 mm CPTCI 1H-
PULPROG  zg30
TD        65536
SOLVENT  CDCl3
NS        16
DS        2
SWH      10330.578 Hz
FIDRES   0.157632 Hz
AQ        3.1719425 sec
RG         9
DW        48.400 usec
DE        6.50 usec
TE        298.3 K
D1        1.00000000 sec
TDO       1

===== CHANNEL f1 =====
NUC1      1H
P1        6.70 usec
PL1       4.00 dB
PLLW      8.72000027 W
SFO1      500.2730894 MHz

F2 - Processing parameters
SI         32768
SF         500.2700081 MHz
WDW        EM
SSB        0
LB         0.30 Hz
GB         0
PC         1.00
```

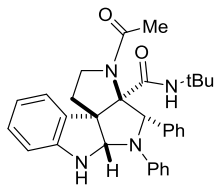

13a

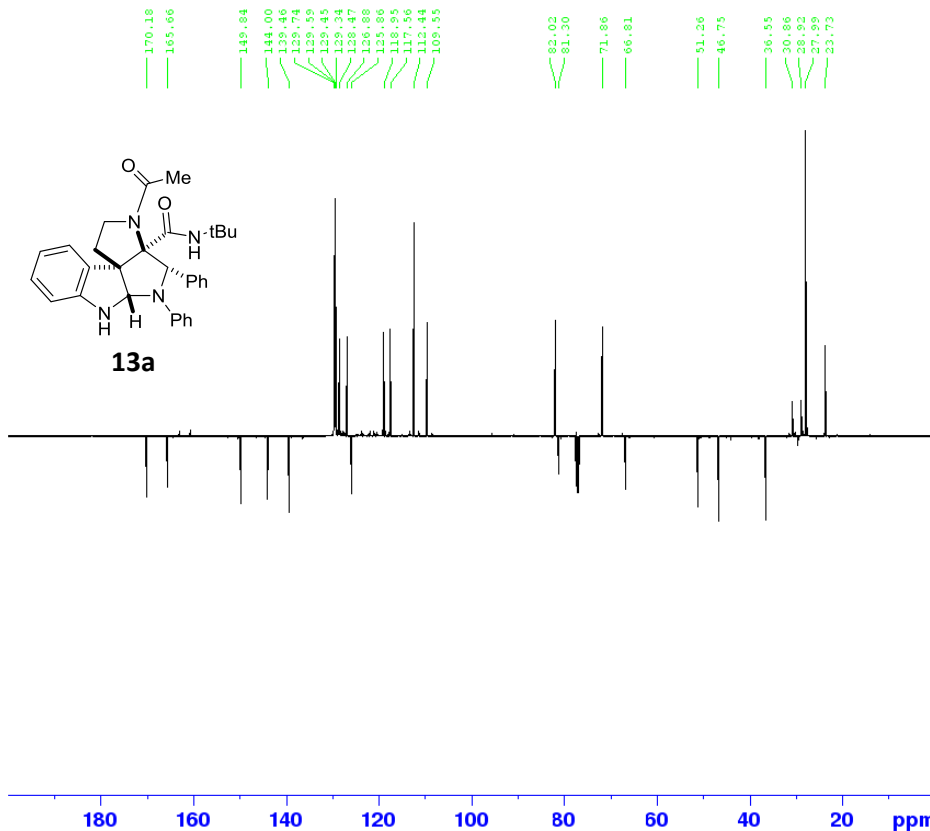

```
Current Data Parameters
NAME      JMS-237
EXPNO    3
PROCNO   1

F2 - Acquisition Parameters
Date_    20160626
Time     16.35
INSTRUM  spect
PROBHD   5 mm CPTCI 1H-
PULPROG  jmod
TD        65536
SOLVENT  CDCl3
NS        512
DS        4
SWH      29761.904 Hz
FIDRES   0.454131 Hz
AQ        1.1010048 sec
RG        2050
DW        16.800 usec
DE        6.50 usec
TE        298.2 K
CNST2    145.0000000
CNST11    1.0000000
D1        2.00000000 sec
D20       0.00689655 sec
TDO       1

===== CHANNEL f1 =====
NUC1      13C
P1        11.20 usec
P2        22.40 usec
PL1       -2.00 dB
PL12      25.28 dB
PLLW      88.77790070 W
SFO1      125.8055709 MHz

===== CHANNEL f2 =====
CPDPRG[2] waltz16
NUC2      1H
PCPD2     80.00 usec
PL2       4.00 dB
PL12      25.28 dB
PLLW      8.72000027 W
SFO2      500.2720011 MHz

F2 - Processing parameters
SI         32768
SF         125.7929946 MHz
WDW        EM
SSB        0
LB         1.00 Hz
GB         0
PC         1.40
```

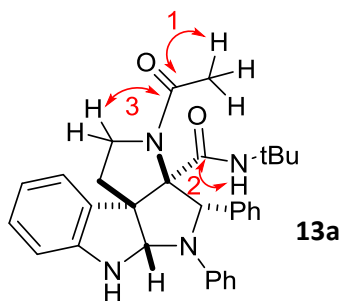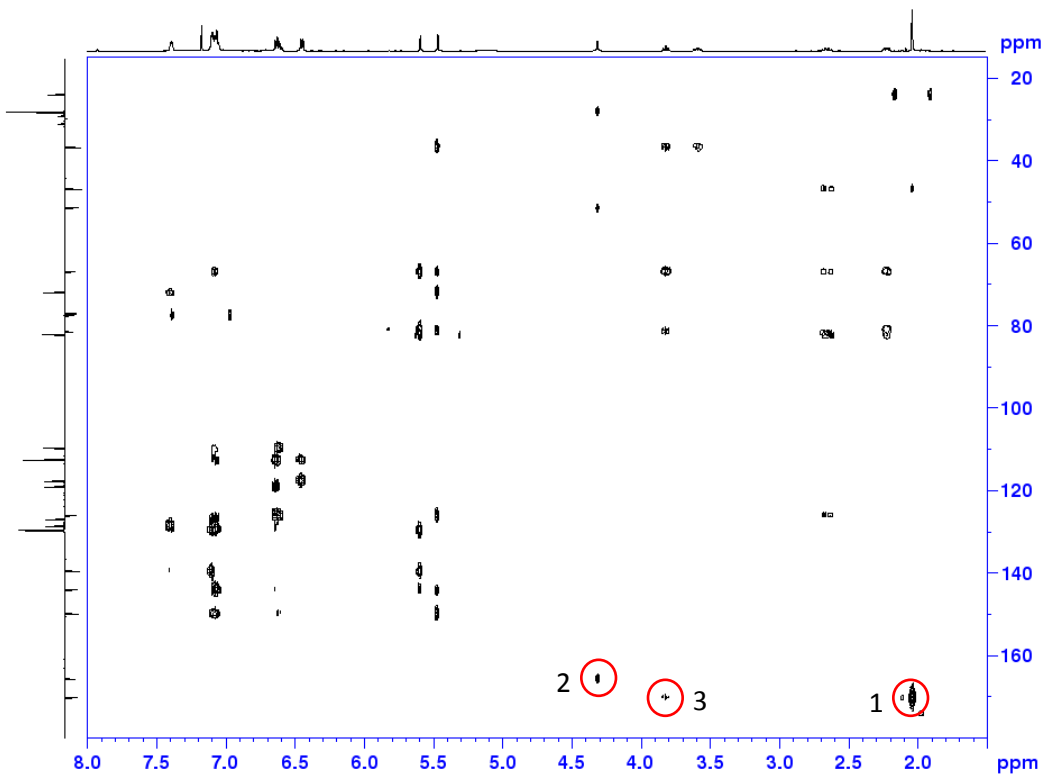

```

Current Data Parameters
NAME      315-217
EXPNO    7
PROCNO    1

F2 - Acquisition Parameters
Date_     20160722
Time      1.59
INSTRUM   spect
PROBHD    5 mm CPYAI 1H-
PULPROG   hmcgpgpg2g2
TD         4096
SOLVENT   CDCl3
NS         8
DS         16
SFR       500.1352 MHz
FIDRES    1.4261414 Hz
AQ        0.3481400 sec
RG         2500
DE        85.000 usec
DE2       4.50 usec
TE        298.2 K
===== CHANNEL f1 =====
NUC1       13C
P1         6.70 usec
P2         15.40 usec
PL1        -2.00 dB
PL2        0.00 dB
PL12      18.7779067 V
PL13      5.72000027 V
SFO1      500.135276 MHz

===== CHANNEL f2 =====
NUC2       13C
P1         11.20 usec
P2         -2.00 dB
PL12      18.7779067 V
SFO2      125.762538 MHz

===== GRADIENT CHANNEL =====
GPRM[1]    GMR 100
GPRM[2]    GMR 100
GPRM[3]    GMR 100
CPE1       50.00 %
CPE2       20.00 %
CPE3       40.10 %
F14        1000.00 usec

F1 - Acquisition parameters
TD         132
SFO1      125.762538 MHz
FIDRES    436.574816 Hz
SF        222.485 ppm
F2MODE    QF

F2 - Processing parameters
SI         2048
SF        500.135276 MHz
WDW        EM
SSB        0
LB         0 Hz
GB         0
FO         1.40

F1 - Processing parameters
SI         1024
SF        125.762538 MHz
WDW        EM
SSB        0
LB         0 Hz
GB         0

```

8.104  
8.088  
7.595  
7.565  
7.548  
7.539  
7.524  
7.477  
7.462  
7.446  
7.422  
7.407  
7.391  
7.376  
7.361  
7.233  
7.206  
7.189  
7.161  
7.071  
7.055  
7.038  
6.961  
6.946  
6.946  
6.770  
6.754  
6.745  
6.726  
6.709  
6.621  
6.621  
6.356  
6.339  
5.727  
5.668  
4.138  
3.804  
3.787  
1.112  
1.098  
0.798  
0.783  
0.769  
0.757  
0.744

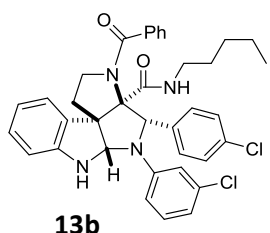

Current Data Parameters  
NAME JMS-273  
EXPNO 4  
PROCNO 1

F2 - Acquisition Parameters  
Date\_ 20160723  
Time 19.44  
INSTRUM spect  
PROBHD 5 mm CPTCI 1H-  
PULPROG zg30  
TD 65536  
SOLVENT CDCl3  
NS 16  
DS 2  
SWH 10330.578 Hz  
FIDRES 0.157632 Hz  
AQ 3.1719425 sec  
RG 14.2  
DW 48.400 usec  
DE 6.50 usec  
TE 298.3 K  
D1 1.00000000 sec  
TDO 1

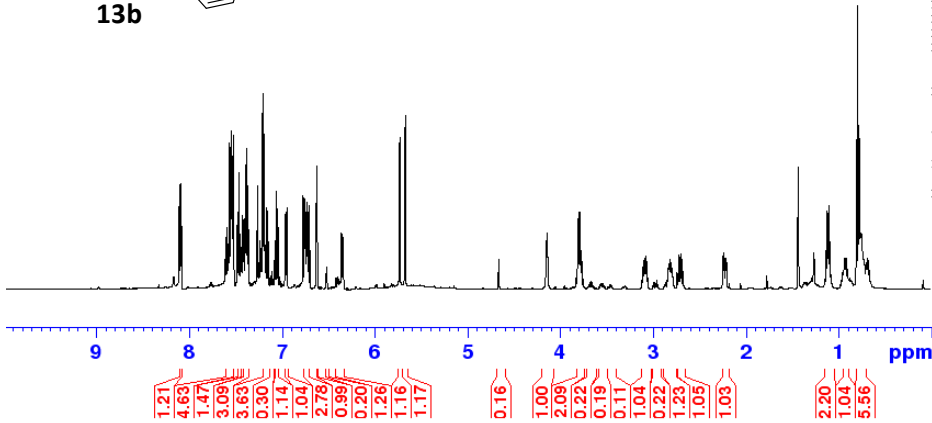

===== CHANNEL f1 =====  
NUC1 1H  
P1 6.70 usec  
PL1 4.00 dB  
PL1W 8.72000027 W  
SFO1 500.2730894 MHz

F2 - Processing parameters  
SI 32768  
SF 500.2700062 MHz  
WDW EH  
SSB 0  
LB 0.30 Hz  
GB 0  
FC 1.00

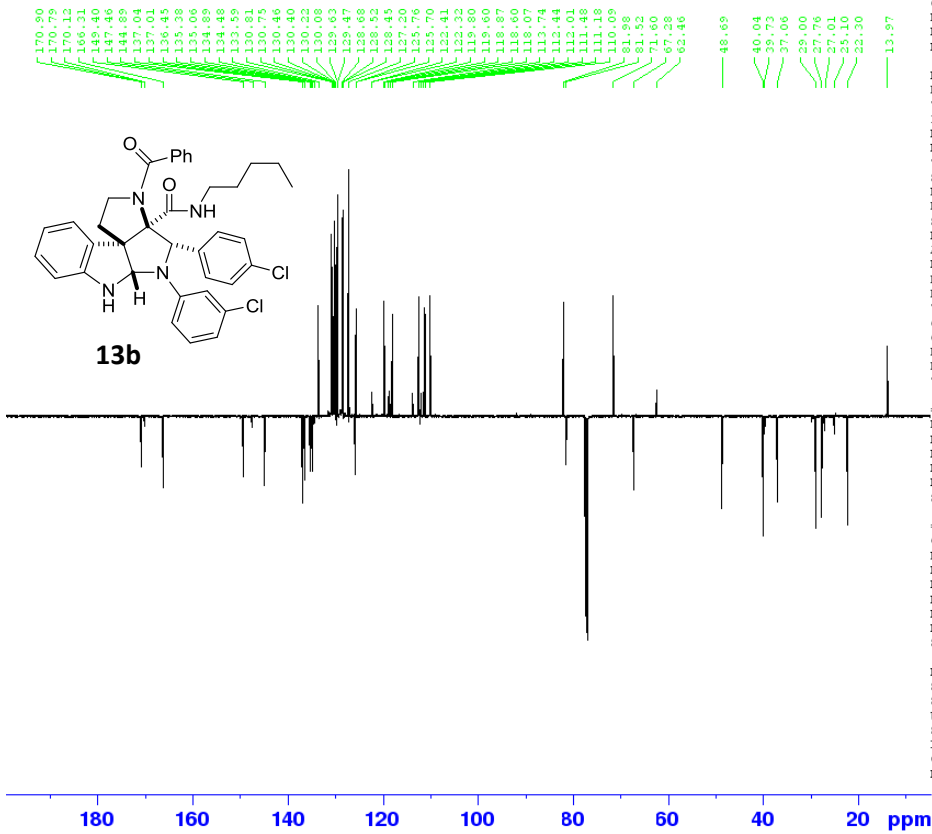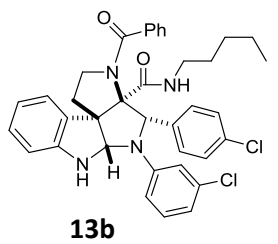

Current Data Parameters  
NAME JMS-273  
EXPNO 2  
PROCNO 1

F2 - Acquisition Parameters  
Date\_ 20160722  
Time 9.26  
INSTRUM spect  
PROBHD 5 mm CPTCI 1H-  
PULPROG jmod  
TD 65536  
SOLVENT CDCl3  
NS 512  
DS 4  
SWH 29761.904 Hz  
FIDRES 0.454131 Hz  
AQ 1.1010048 sec  
RG 2050  
DW 16.800 usec  
DE 6.50 usec  
TE 298.2 K  
CNST2 145.0000000  
CNST11 1.0000000  
D1 2.00000000 sec  
D20 0.00689655 sec  
TDO 1

===== CHANNEL f1 =====  
NUC1 13C  
P1 11.20 usec  
P2 22.40 usec  
PL1 -2.00 dB  
PL1W 88.77790070 W  
SFO1 125.8055709 MHz

===== CHANNEL f2 =====  
CPDPRG[2] waltz16  
NUC2 1H  
PCPD2 80.00 usec  
PL2 4.00 dB  
PL12 25.28 dB  
PL2W 8.72000027 W  
PL12W 0.06494062 W  
SFO2 500.2720011 MHz

F2 - Processing parameters  
SI 32768  
SF 125.7929810 MHz  
WDW EH  
SSB 0  
LB 1.00 Hz  
GB 0  
FC 1.40

## References

- (1) A. V Lygin and A. de Meijere, *Eur. J. Org. Chem.* 2009, **30**, 5138.
- (2) T. D. Montgomery, A. E. Nibbs, Y. Zhu and V. H. Rawal, *Org. Lett.* 2014, **16**, 3480.
- (3) J. M. Allen and T. H. Lambert, *J. Am. Chem. Soc.* 2011, **133**, 1260–1262.
- (4) G.M. Sheldrick, *Acta Cryst.* 2008, **A64**, 112.
- (5) C. B. Hübschle, G. M. Sheldrick and B. Dittrich, *J. Appl. Cryst.* 2011, **44**, 1281.
